# Supplementary material for: A functional map of genomic HIF1α-DNA complexes in the eye lens revealed through multiomics analysis
Source: BMC Genomics. 2021 Jul 3;22:497. doi: 10.1186/s12864-021-07795-9 (PMC8254356; doi:10.1186/s12864-021-07795-9)
Supplement: Supplementary file 2 — Additional file 2 Table S2. Gene expression analysis via RNA-seq of DMOG-treated vs untreated primary lens cells. [file 12864_2021_7795_MOESM2_ESM.xlsx]

## Sheet: README
Column Name	Description		DEGs Upregulated	DEGs Downregulated	NonDEGs
gene_id	gene identification number		genes with log2FC > 0.6, p < 0.05	genes with log2FC < -0.6, p < 0.05	genes with p > 0.05
gene_name	Gene symbol
transcript_id	Ensembl transcript Id
GO	Gene ontologies
KEGG	KEGG pathways
Description	Gene name
FPKM.DMOG1	fragments per kilobase transcript per million reads in DMOG-treated lens cells
FPKM.DMOG2
FPKM.DMOG3
FPKM.Control1	fragments per kilobase transcript per million reads in untreated lens cells
FPKM.Control2
FPKM.Control3
fc	fold change average DMOG FPKM/Control FPKM
log2(fc)	log2(fold change)
pval	statistic from edgeR

## Sheet: DEGs Upregulated
gene_id	gene_name	transcript_id	GO	KEGG	Description	FPKM.DMOG1	FPKM.DMOG2	FPKM.DMOG3	FPKM.Control1	FPKM.Control2	FPKM.Control3	fc	log2(fc)	pval
MSTRG.24523	ENSGALG00000049602	ENSGALT00000105641	NA	NA		8.03007	2.8089	2.15205	0.0001	0.0001	0.0001	43303.4	15.4022	0.00171042
MSTRG.57545	ENSGALG00000052538	ENSGALT00000107182	NA	NA		1.77648	0.25663	2.29888	0.0001	0.0001	0.0001	14440	13.8178	0.0354922
MSTRG.116362	RGS4	ENSGALT00000004050;ENSGALT00000103723	GO:0005096(GTPase activator activity);GO:0005634(nucleus);GO:0005737(cytoplasm);GO:0007186(G protein-coupled receptor signaling pathway);GO:0043547(positive regulation of GTPase activity);GO:0043547(positive regulation of GTPase activity)	NA	regulator of G-protein signaling 4 [Source:NCBI gene;Acc:378901]	1.41882	0.959785	0.0001	0.0001	0.0001	0.0001	7929	12.9529	0.00713958
MSTRG.62613	STC1	ENSGALT00000000496	GO:0001886(endothelial cell morphogenesis);GO:0003421(growth plate cartilage axis specification);GO:0005179(hormone activity);GO:0005576(extracellular region);GO:0005615(extracellular space);GO:0005634(nucleus);GO:0005737(cytoplasm);GO:0006874(cellular calcium ion homeostasis);GO:0010469(regulation of signaling receptor activity);GO:0010596(negative regulation of endothelial cell migration);GO:00…	NA	stanniocalcin 1 [Source:NCBI gene;Acc:428201]	31.0759	30.3161	14.0601	0.0001	0.099991	0.0001	753.083	9.55667	9.08254e-24
MSTRG.62121	EFHD2	ENSGALT00000079686	GO:0005509(calcium ion binding)	NA	EF-hand domain family member D2 [Source:NCBI gene;Acc:430669]	6.90142	2.48067	4.26796	0.0001	0.0001	0.188363	72.3899	6.17772	5.90117e-05
MSTRG.103075	ENSGALG00000011166	ENSGALT00000018206	NA	NA	protein kinase domain containing, cytoplasmic b [Source:NCBI gene;Acc:423451]	0.607756	6.86378	3.81475	0.0001	0.20642	0.0001	54.6234	5.77145	0.0010107
MSTRG.28431	TERF2IP	ENSGALT00000001325	GO:0000723(telomere maintenance);GO:0000781(chromosome, telomeric region);GO:0000783(nuclear telomere cap complex);GO:0000784(nuclear chromosome, telomeric region);GO:0001933(negative regulation of protein phosphorylation);GO:0003677(DNA binding);GO:0005634(nucleus);GO:0005635(nuclear envelope);GO:0005654(nucleoplasm);GO:0005737(cytoplasm);GO:0005829(cytosol);GO:0006355(regulation of transcriptio…	NA	TERF2 interacting protein [Source:NCBI gene;Acc:395122]	14.2969	0.220229	19.3762	0.0001	0.145944	0.503134	52.2096	5.70624	8.14513e-05
MSTRG.65620	G0S2	ENSGALT00000040292	GO:0005739(mitochondrion);GO:0097191(extrinsic apoptotic signaling pathway);GO:0120162(positive regulation of cold-induced thermogenesis);GO:2001238(positive regulation of extrinsic apoptotic signaling pathway)	NA	G0/G1 switch 2 [Source:NCBI gene;Acc:419860]	61.2238	107.034	44.7604	0.0001	0.0001	4.30685	49.4581	5.62814	0.000401792
MSTRG.100918	EGLN3	ENSGALT00000016249	GO:0001666(response to hypoxia);GO:0005506(iron ion binding);GO:0005634(nucleus);GO:0005737(cytoplasm);GO:0005829(cytosol);GO:0006915(apoptotic process);GO:0006919(activation of cysteine-type endopeptidase activity involved in apoptotic process);GO:0016491(oxidoreductase activity);GO:0016705(oxidoreductase activity, acting on paired donors, with incorporation or reduction of molecular oxygen);GO:…	NA	egl-9 family hypoxia inducible factor 3 [Source:NCBI gene;Acc:423316]	57.1509	54.0382	47.6113	1.3536	2.05693	1.86709	30.0894	4.91118	2.28864e-31
MSTRG.101149	PGF	ENSGALT00000095943	GO:0008083(growth factor activity);GO:0016020(membrane)	04010(MAPK signaling pathway);04510(Focal adhesion)	placental growth factor [Source:NCBI gene;Acc:771832]	10.7492	11.0317	14.4228	0.0001	0.972003	0.366823	27.0394	4.75699	3.92551e-06
MSTRG.28935	SLC38A3	ENSGALT00000043109	GO:0003333(amino acid transmembrane transport);GO:0005290(L-histidine transmembrane transporter activity);GO:0005886(plasma membrane);GO:0005887(integral component of plasma membrane);GO:0006867(asparagine transport);GO:0006868(glutamine transport);GO:0015171(amino acid transmembrane transporter activity);GO:0015180(L-alanine transmembrane transporter activity);GO:0015182(L-asparagine transmembra…	NA	solute carrier family 38 member 3 [Source:NCBI gene;Acc:429200]	5.682	4.89118	2.74945	0.024458	0.0001	0.582252	21.9552	4.45649	0.00053736
MSTRG.9380	ENO2	ENSGALT00000089014;ENSGALT00000085364;ENSGALT00000023444	GO:0000015(phosphopyruvate hydratase complex);GO:0000287(magnesium ion binding);GO:0001917(photoreceptor inner segment);GO:0004634(phosphopyruvate hydratase activity);GO:0005737(cytoplasm);GO:0005829(cytosol);GO:0005886(plasma membrane);GO:0006096(glycolytic process);GO:0016020(membrane);GO:0043025(neuronal cell body);GO:0043204(perikaryon);GO:0043204(perikaryon)	00010(Glycolysis / Gluconeogenesis);03018(RNA degradation);03018(RNA degradation)	enolase 2 [Source:NCBI gene;Acc:395689]	17.9288	15.9046	5.71325	0.692694	0.51327	1.22258	16.2841	4.02539	7.67826e-11
MSTRG.130651	LOX	ENSGALT00000069909	NA	NA	lysyl oxidase [Source:NCBI gene;Acc:396474]	141.929	133.908	91.1652	8.4402	7.63528	8.22524	15.1025	3.91672	8.84992e-23
MSTRG.106584	ANAPC16;DDIT4	ENSGALT00000007029;ENSGALT00000080768	GO:0000776(kinetochore);GO:0005680(anaphase-promoting complex);GO:0005829(cytosol);GO:0016567(protein ubiquitination);GO:0001666(response to hypoxia);GO:0005737(cytoplasm);GO:0005739(mitochondrion);GO:0009968(negative regulation of signal transduction);GO:0032007(negative regulation of TOR signaling);GO:0032984(protein-containing complex disassembly);GO:0042771(intrinsic apoptotic signaling pathw…	NA	anaphase promoting complex subunit 16 [Source:NCBI gene;Acc:423708];DNA damage inducible transcript 4 [Source:HGNC Symbol;Acc:HGNC:24944]	27.6608	36.0257	28.3248	2.04023	1.84686	2.56048	14.2707	3.83498	2.42508e-19
MSTRG.100916	ENSGALG00000054153	ENSGALT00000099662	NA	NA		12.6523	9.89261	7.08942	0.825883	0.784319	0.883215	11.885	3.57107	3.42601e-15
MSTRG.83239	IL13RA1	ENSGALT00000087811	GO:0004896(cytokine receptor activity);GO:0005515(protein binding);GO:0009897(external side of plasma membrane);GO:0016020(membrane);GO:0016021(integral component of membrane);GO:0019221(cytokine-mediated signaling pathway);GO:0019955(cytokine binding);GO:0019976(interleukin-2 binding);GO:0043235(receptor complex)	04060(Cytokine-cytokine receptor interaction)	interleukin 13 receptor subunit alpha 1 [Source:NCBI gene;Acc:422230]	4.72117	3.37768	0.95115	0.146757	0.677041	0.0001	10.9844	3.45738	0.00489373
MSTRG.31127	BHLHE40	ENSGALT00000073347	GO:0000122(negative regulation of transcription by RNA polymerase II);GO:0000977(RNA polymerase II regulatory region sequence-specific DNA binding);GO:0000978(RNA polymerase II proximal promoter sequence-specific DNA binding);GO:0000980(RNA polymerase II distal enhancer sequence-specific DNA binding);GO:0000981(DNA-binding transcription factor activity, RNA polymerase II-specific);GO:0001102(RNA …	NA	basic helix-loop-helix family member e40 [Source:NCBI gene;Acc:416108]	35.8614	34.2854	3.99551	2.64021	2.66542	1.51738	10.8665	3.44181	3.27142e-07
MSTRG.68787	COQ8B	ENSGALT00000014777	GO:0005739(mitochondrion);GO:0006744(ubiquinone biosynthetic process);GO:0016301(kinase activity);GO:0016310(phosphorylation);GO:0031314(extrinsic component of mitochondrial inner membrane);GO:0043531(ADP binding)	NA	coenzyme Q8B [Source:NCBI gene;Acc:416745]	247.593	242.184	156.231	20.4074	20.1115	22.361	10.2737	3.36088	1.05714e-17
MSTRG.108248	PPP1R3C	ENSGALT00000010788	GO:0005515(protein binding);GO:0005975(carbohydrate metabolic process);GO:0005977(glycogen metabolic process);GO:0005978(glycogen biosynthetic process);GO:0019888(protein phosphatase regulator activity);GO:0019903(protein phosphatase binding);GO:0043666(regulation of phosphoprotein phosphatase activity)	04910(Insulin signaling pathway)	protein phosphatase 1 regulatory subunit 3C [Source:NCBI gene;Acc:425328]	16.8864	13.4348	26.894	2.05361	2.09965	1.83497	9.55461	3.2562	1.35723e-12
MSTRG.42569	HIC1	ENSGALT00000079270	GO:0000122(negative regulation of transcription by RNA polymerase II);GO:0001227(DNA-binding transcription repressor activity, RNA polymerase II-specific);GO:0003676(nucleic acid binding);GO:0003700(DNA-binding transcription factor activity);GO:0005515(protein binding);GO:0005634(nucleus);GO:0005654(nucleoplasm);GO:0005829(cytosol);GO:0008630(intrinsic apoptotic signaling pathway in response to D…	NA	HIC ZBTB transcriptional repressor 1 [Source:NCBI gene;Acc:396164]	2.10281	1.5716	1.43307	0.233085	0.0001	0.308673	9.42587	3.23663	0.00589906
MSTRG.64405	NLRX1;PDZD3	ENSGALT00000010967;ENSGALT00000091364;ENSGALT00000040801	GO:0000166(nucleotide binding);GO:0005515(protein binding);GO:0005524(ATP binding);GO:0005737(cytoplasm);GO:0005739(mitochondrion);GO:0005886(plasma membrane);GO:0030054(cell junction);GO:0032688(negative regulation of interferon-beta production);GO:0032715(negative regulation of interleukin-6 production);GO:0035556(intracellular signal transduction);GO:0039536(negative regulation of RIG-I signal…	04621(NOD-like receptor signaling pathway);04622(RIG-I-like receptor signaling pathway);05164(Influenza A);05164(Influenza A)	NLR family member X1 [Source:NCBI gene;Acc:419755];PDZ domain containing 3 [Source:NCBI gene;Acc:769876]	1.69612	1.1369	0.0001	0.0864557	0.110247	0.106531	9.34302	3.22389	0.0326417
MSTRG.20739	FLT1	ENSGALT00000027608	GO:0000166(nucleotide binding);GO:0002040(sprouting angiogenesis);GO:0002548(monocyte chemotaxis);GO:0004672(protein kinase activity);GO:0004713(protein tyrosine kinase activity);GO:0004714(transmembrane receptor protein tyrosine kinase activity);GO:0005021(vascular endothelial growth factor-activated receptor activity);GO:0005524(ATP binding);GO:0005886(plasma membrane);GO:0005887(integral compo…	04010(MAPK signaling pathway);04510(Focal adhesion)	fms related tyrosine kinase 1 [Source:NCBI gene;Acc:374100]	12.7318	7.70372	7.38794	0.441785	1.50663	1.47249	8.13336	3.02385	8.66909e-08
MSTRG.23567	CHRNA7	ENSGALT00000006519	GO:0001933(negative regulation of protein phosphorylation);GO:0001934(positive regulation of protein phosphorylation);GO:0001988(positive regulation of heart rate involved in baroreceptor response to decreased systemic arterial blood pressure);GO:0004888(transmembrane signaling receptor activity);GO:0005216(ion channel activity);GO:0005230(extracellular ligand-gated ion channel activity);GO:00057…	04020(Calcium signaling pathway);04080(Neuroactive ligand-receptor interaction)	cholinergic receptor nicotinic alpha 7 subunit [Source:NCBI gene;Acc:374001]	25.7054	29.3392	15.1863	0.550535	2.36323	6.2792	7.63964	2.9335	3.16771e-05
MSTRG.95252	ENSGALG00000047526	ENSGALT00000096586	GO:0004930(G protein-coupled receptor activity);GO:0007186(G protein-coupled receptor signaling pathway);GO:0016021(integral component of membrane)	NA	G protein-coupled receptor 152 [Source:NCBI gene;Acc:430433]	1.96786	7.36308	2.15522	0.853643	0.571947	0.136584	7.35268	2.87827	0.00494657
MSTRG.59419	NRBP2	ENSGALT00000105120;ENSGALT00000067911	GO:0004672(protein kinase activity);GO:0004674(protein serine/threonine kinase activity);GO:0005524(ATP binding);GO:0005737(cytoplasm);GO:0006468(protein phosphorylation);GO:0006888(endoplasmic reticulum to Golgi vesicle-mediated transport);GO:0012505(endomembrane system);GO:0016242(negative regulation of macroautophagy);GO:0035556(intracellular signal transduction);GO:0035556(intracellular signa…	NA	nuclear receptor binding protein 2 [Source:NCBI gene;Acc:776552]	3.36072	2.96185	1.00392	0.088984	0.181972	0.734407	7.28741	2.86541	0.0032039
MSTRG.41102	RAB11FIP4	ENSGALT00000099188;ENSGALT00000005109	GO:0003407(neural retina development);GO:0005509(calcium ion binding);GO:0005768(endosome);GO:0005813(centrosome);GO:0017137(Rab GTPase binding);GO:0030139(endocytic vesicle);GO:0030306(ADP-ribosylation factor binding);GO:0030496(midbody);GO:0032154(cleavage furrow);GO:0032456(endocytic recycling);GO:0032465(regulation of cytokinesis);GO:0042803(protein homodimerization activity);GO:0048471(perin…	04144(Endocytosis);04144(Endocytosis)	RAB11 family interacting protein 4 (class II) [Source:NCBI gene;Acc:427808]	32.9188	39.6751	8.62322	1.67118	7.13752	2.37379	7.26288	2.86054	5.12109e-06
MSTRG.63066	SDC3	ENSGALT00000062640	GO:0009986(cell surface);GO:0016020(membrane);GO:0016021(integral component of membrane);GO:0016477(cell migration);GO:0035988(chondrocyte proliferation);GO:0042802(identical protein binding);GO:1900026(positive regulation of substrate adhesion-dependent cell spreading)	04514(Cell adhesion molecules (CAMs))	syndecan 3 [Source:NCBI gene;Acc:396343]	4.0891	3.3531	1.79246	0.870923	0.0001	0.417695	7.16578	2.84112	0.0152811
MSTRG.114631	ITGB5	ENSGALT00000081641	GO:0005178(integrin binding);GO:0005925(focal adhesion);GO:0007155(cell adhesion);GO:0007160(cell-matrix adhesion);GO:0007179(transforming growth factor beta receptor signaling pathway);GO:0007229(integrin-mediated signaling pathway);GO:0008305(integrin complex);GO:0009986(cell surface);GO:0016020(membrane);GO:0016021(integral component of membrane);GO:0016477(cell migration);GO:0033627(cell adhe…	04145(Phagosome);04510(Focal adhesion);04512(ECM-receptor interaction);04810(Regulation of actin cytoskeleton)	integrin subunit beta 5 [Source:NCBI gene;Acc:395142]	13.9041	13.1066	6.11377	0.716356	0.807439	3.42656	6.69135	2.7423	4.11871e-05
MSTRG.20166	UFM1	ENSGALT00000049545	GO:0005634(nucleus);GO:0005737(cytoplasm);GO:0005783(endoplasmic reticulum);GO:0007420(brain development);GO:0033146(regulation of intracellular estrogen receptor signaling pathway);GO:0034976(response to endoplasmic reticulum stress);GO:0071569(protein ufmylation);GO:1990592(protein K69-linked ufmylation)	NA	ubiquitin fold modifier 1 [Source:NCBI gene;Acc:418894]	10.2143	43.235	68.4438	3.56216	10.8219	4.01043	6.6266	2.72827	2.16952e-05
MSTRG.25596	ENSGALG00000030576	ENSGALT00000056028	GO:0005515(protein binding)	NA	ankyrin repeat domain 34C [Source:NCBI gene;Acc:415579]	4.37013	3.12715	2.14772	0.286538	0.0001	1.19549	6.50752	2.70211	0.0410354
MSTRG.40014	CACFD1	ENSGALT00000082185	GO:0016020(membrane);GO:0016021(integral component of membrane);GO:0016192(vesicle-mediated transport)	NA	calcium channel flower domain containing 1 [Source:NCBI gene;Acc:417151]	6.25144	7.76992	5.3547	0.465007	0.367397	2.17108	6.45119	2.68957	0.000479429
MSTRG.81048	ENSGALG00000054948;ENSGALG00000038191	ENSGALT00000107534;ENSGALT00000024548	GO:0005737(cytoplasm);GO:0008270(zinc ion binding);GO:0045202(synapse)	NA		2.01431	6.00309	1.133	0.826716	0.184083	0.456729	6.23525	2.64045	0.0221601
MSTRG.124299	CA9	ENSGALT00000034416	GO:0002009(morphogenesis of an epithelium);GO:0004089(carbonate dehydratase activity);GO:0005886(plasma membrane);GO:0008270(zinc ion binding);GO:0016020(membrane);GO:0016021(integral component of membrane);GO:0046872(metal ion binding);GO:0046903(secretion)	00910(Nitrogen metabolism)	carbonic anhydrase 9 [Source:NCBI gene;Acc:770004]	2.6157	3.96716	0.958952	0.0250808	0.14722	1.0849	5.99892	2.5847	0.0145396
MSTRG.87677	FAM13A	ENSGALT00000016897;ENSGALT00000064524	GO:0007165(signal transduction);GO:0007165(signal transduction)	NA	family with sequence similarity 13 member A [Source:NCBI gene;Acc:422515]	21.5567	20.2431	14.5837	2.81382	3.73094	2.8708	5.98832	2.58215	2.20404e-11
MSTRG.13615	UBASH3A	ENSGALT00000036706	GO:0005515(protein binding);GO:0005654(nucleoplasm);GO:0005794(Golgi apparatus);GO:0009968(negative regulation of signal transduction);GO:0016311(dephosphorylation);GO:0016791(phosphatase activity);GO:0050860(negative regulation of T cell receptor signaling pathway)	NA	ubiquitin associated and SH3 domain containing A [Source:NCBI gene;Acc:418535]	0.455646	0.623009	1.27129	0.0001	0.265511	0.146448	5.70293	2.5117	0.033959
MSTRG.67187	ENSGALG00000054562;ENSGALG00000037029	ENSGALT00000105852;ENSGALT00000107883;ENSGALT00000078372	GO:0004114(3',5'-cyclic-nucleotide phosphodiesterase activity);GO:0004115(3',5'-cyclic-AMP phosphodiesterase activity);GO:0005515(protein binding);GO:0007165(signal transduction);GO:0008081(phosphoric diester hydrolase activity);GO:0016787(hydrolase activity);GO:0046872(metal ion binding);GO:0046872(metal ion binding)	00230(Purine metabolism);00230(Purine metabolism)	phosphodiesterase 4C [Source:NCBI gene;Acc:769860]	0.902099	1.45913	0.258193	0.159794	0.242617	0.0603992	5.65982	2.50076	0.0199062
MSTRG.33818	KLHL3	ENSGALT00000070628;ENSGALT00000056509	GO:0005515(protein binding);GO:0005829(cytosol);GO:0006511(ubiquitin-dependent protein catabolic process);GO:0016567(protein ubiquitination);GO:0031463(Cul3-RING ubiquitin ligase complex);GO:0050801(ion homeostasis);GO:0070294(renal sodium ion absorption);GO:0070936(protein K48-linked ubiquitination);GO:0072156(distal tubule morphogenesis);GO:0072156(distal tubule morphogenesis)	NA	kelch like family member 3 [Source:NCBI gene;Acc:416303]	10.8278	9.5731	6.70354	2.00957	0.869806	1.97397	5.58469	2.48148	9.22777e-06
MSTRG.99237	CHAC1	ENSGALT00000045646	GO:0003839(gamma-glutamylcyclotransferase activity);GO:0005112(Notch binding);GO:0005737(cytoplasm);GO:0005802(trans-Golgi network);GO:0006751(glutathione catabolic process);GO:0016829(lyase activity);GO:0022008(neurogenesis);GO:0061928(glutathione specific gamma-glutamylcyclotransferase activity)	00480(Glutathione metabolism)	ChaC glutathione specific gamma-glutamylcyclotransferase 1 [Source:NCBI gene;Acc:423209]	4.3224	4.97185	3.3463	0.482692	1.22001	0.618483	5.44572	2.44512	0.000458915
MSTRG.100832	NPAS3	ENSGALT00000085517;ENSGALT00000088783	GO:0000981(DNA-binding transcription factor activity, RNA polymerase II-specific);GO:0005515(protein binding);GO:0005634(nucleus);GO:0005654(nucleoplasm);GO:0005829(cytosol);GO:0006355(regulation of transcription, DNA-templated);GO:0006357(regulation of transcription by RNA polymerase II);GO:0045944(positive regulation of transcription by RNA polymerase II);GO:0046983(protein dimerization activit…	NA	neuronal PAS domain protein 3 [Source:NCBI gene;Acc:423315]	6.34563	5.28698	3.04609	0.38271	0.577057	1.74308	5.43084	2.44117	7.59403e-05
MSTRG.122761	AADAC	ENSGALT00000016884	GO:0004806(triglyceride lipase activity);GO:0005789(endoplasmic reticulum membrane);GO:0010898(positive regulation of triglyceride catabolic process);GO:0016021(integral component of membrane);GO:0016787(hydrolase activity);GO:0017171(serine hydrolase activity);GO:0019213(deacetylase activity);GO:0052689(carboxylic ester hydrolase activity)	NA	arylacetamide deacetylase [Source:NCBI gene;Acc:425034]	3.5694	2.9176	0.975697	0.424849	0.155431	0.82458	5.31205	2.40927	0.00761559
MSTRG.690	DHTKD1	ENSGALT00000005822	GO:0002244(hematopoietic progenitor cell differentiation);GO:0004591(oxoglutarate dehydrogenase (succinyl-transferring) activity);GO:0005739(mitochondrion);GO:0005829(cytosol);GO:0006091(generation of precursor metabolites and energy);GO:0006099(tricarboxylic acid cycle);GO:0016624(oxidoreductase activity, acting on the aldehyde or oxo group of donors, disulfide as acceptor);GO:0030976(thiamine p…	00310(Lysine degradation);00380(Tryptophan metabolism)	dehydrogenase E1 and transketolase domain containing 1 [Source:NCBI gene;Acc:426076]	14.163	12.3714	6.60634	2.06862	2.15437	2.0708	5.26562	2.3966	3.42127e-07
MSTRG.121179	FAM43A	ENSGALT00000082189	GO:0005515(protein binding)	NA	family with sequence similarity 43 member A [Source:NCBI gene;Acc:429145]	16.5897	20.0906	18.721	3.88365	2.34784	4.54035	5.14316	2.36265	2.92511e-06
MSTRG.40743	SEPT9	ENSGALT00000100690;ENSGALT00000047767	GO:0000166(nucleotide binding);GO:0001725(stress fiber);GO:0003924(GTPase activity);GO:0005525(GTP binding);GO:0005874(microtubule);GO:0005930(axoneme);GO:0005940(septin ring);GO:0015629(actin cytoskeleton);GO:0015630(microtubule cytoskeleton);GO:0031105(septin complex);GO:0032947(protein-containing complex scaffold activity);GO:0048471(perinuclear region of cytoplasm);GO:0051291(protein heterool…	NA	septin 9 [Source:NCBI gene;Acc:417347]	26.0722	31.715	14.8785	3.35566	3.65434	7.66305	4.95232	2.30811	1.11682e-06
MSTRG.41719	SLC9A3R1	ENSGALT00000012381;ENSGALT00000108148	GO:0003096(renal sodium ion transport);GO:0005102(signaling receptor binding);GO:0005515(protein binding);GO:0005737(cytoplasm);GO:0005902(microvillus);GO:0007097(nuclear migration);GO:0007191(adenylate cyclase-activating dopamine receptor signaling pathway);GO:0007605(sensory perception of sound);GO:0008013(beta-catenin binding);GO:0008285(negative regulation of cell population proliferation);GO…	04530(Tight junction);04530(Tight junction)	SLC9A3 regulator 1 [Source:NCBI gene;Acc:422108]	8.82453	10.8363	7.25792	1.26979	1.20488	3.14462	4.79041	2.26015	6.64088e-05
MSTRG.39471	TOR4A	ENSGALT00000103889;ENSGALT00000014051	GO:0005524(ATP binding);GO:0043066(negative regulation of apoptotic process);GO:0043066(negative regulation of apoptotic process)	NA	torsin family 4 member A [Source:NCBI gene;Acc:417257]	4.56081	3.258	2.02437	1.86371	0.202326	0.102428	4.53924	2.18245	0.0158516
MSTRG.24195	ENSGALG00000026607	ENSGALT00000044915	NA	NA		6.74564	3.27433	5.96124	0.890739	1.61237	1.07791	4.46276	2.15793	0.00122318
MSTRG.40368	PBX3	ENSGALT00000001436;ENSGALT00000079937;ENSGALT00000059403;ENSGALT00000061641	GO:0003677(DNA binding);GO:0003700(DNA-binding transcription factor activity);GO:0005634(nucleus);GO:0006355(regulation of transcription, DNA-templated);GO:0043565(sequence-specific DNA binding);GO:0043565(sequence-specific DNA binding)	NA	PBX homeobox 3 [Source:NCBI gene;Acc:417093]	3.57213	2.03373	1.25403	0.443017	0.552457	0.555004	4.42437	2.14547	0.00156794
MSTRG.22477	MAP6	ENSGALT00000012041	GO:0000226(microtubule cytoskeleton organization);GO:0005516(calmodulin binding);GO:0005798(Golgi-associated vesicle);GO:0005801(cis-Golgi network);GO:0005874(microtubule);GO:0008017(microtubule binding);GO:0030424(axon);GO:0030425(dendrite);GO:0030705(cytoskeleton-dependent intracellular transport);GO:0032418(lysosome localization);GO:0048471(perinuclear region of cytoplasm);GO:0048813(dendrite …	NA	microtubule associated protein 6 [Source:NCBI gene;Acc:395753]	0.88674	0.607562	0.715873	0.261296	0.044299	0.195914	4.40705	2.13981	0.0405681
MSTRG.67250	KLF2	ENSGALT00000006275	GO:0000981(DNA-binding transcription factor activity, RNA polymerase II-specific);GO:0003676(nucleic acid binding);GO:0003700(DNA-binding transcription factor activity);GO:0005634(nucleus);GO:0006357(regulation of transcription by RNA polymerase II);GO:0045944(positive regulation of transcription by RNA polymerase II)	04068(FoxO signaling pathway);04371(Apelin signaling pathway)	Kruppel like factor 2 [Source:NCBI gene;Acc:420148]	13.0373	14.3228	14.9457	1.91689	1.17134	6.58214	4.37479	2.12921	0.000612037
MSTRG.36108	SOCS1	ENSGALT00000011595	GO:0001932(regulation of protein phosphorylation);GO:0005159(insulin-like growth factor receptor binding);GO:0005654(nucleoplasm);GO:0005737(cytoplasm);GO:0005942(phosphatidylinositol 3-kinase complex);GO:0007259(receptor signaling pathway via JAK-STAT);GO:0010533(regulation of activation of Janus kinase activity);GO:0016567(protein ubiquitination);GO:0019210(kinase inhibitor activity);GO:0019221…	04120(Ubiquitin mediated proteolysis);04910(Insulin signaling pathway)	suppressor of cytokine signaling 1 [Source:NCBI gene;Acc:416630]	4.22604	2.89796	4.2313	0.591364	1.42502	0.640954	4.27319	2.09531	0.0341705
MSTRG.66641	FBN3	ENSGALT00000057924	GO:0005201(extracellular matrix structural constituent);GO:0005509(calcium ion binding);GO:0062023(collagen-containing extracellular matrix)	NA	fibrillin 3 [Source:NCBI gene;Acc:395079]	0.457962	0.553664	0.404302	0.140634	0.069754	0.121135	4.27098	2.09457	0.0210322
MSTRG.467	PFKFB3	ENSGALT00000049952;ENSGALT00000075327;ENSGALT00000068310;ENSGALT00000083042	GO:0003824(catalytic activity);GO:0003873(6-phosphofructo-2-kinase activity);GO:0004331(fructose-2,6-bisphosphate 2-phosphatase activity);GO:0005524(ATP binding);GO:0005829(cytosol);GO:0006000(fructose metabolic process);GO:0006003(fructose 2,6-bisphosphate metabolic process);GO:0016311(dephosphorylation);GO:0046835(carbohydrate phosphorylation);GO:0046835(carbohydrate phosphorylation)	00051(Fructose and mannose metabolism);00051(Fructose and mannose metabolism)	6-phosphofructo-2-kinase/fructose-2,6-biphosphatase 3 [Source:NCBI gene;Acc:418247]	45.7633	47.0734	33.32	10.5598	9.13118	11.136	4.09242	2.03295	3.21192e-08
MSTRG.60000	DBNDD2	ENSGALT00000006247	GO:0005737(cytoplasm);GO:0006469(negative regulation of protein kinase activity)	NA	dysbindin domain containing 2 [Source:NCBI gene;Acc:419180]	19.5181	25.4643	14.8286	5.28174	3.82236	5.55514	4.08009	2.0286	7.05089e-06
MSTRG.49577	NRSN1	ENSGALT00000067111;ENSGALT00000106628	GO:0007399(nervous system development);GO:0016020(membrane);GO:0016021(integral component of membrane);GO:0030133(transport vesicle);GO:0030426(growth cone);GO:0031410(cytoplasmic vesicle);GO:0043005(neuron projection);GO:0043025(neuronal cell body);GO:0043025(neuronal cell body)	NA	neurensin 1 [Source:NCBI gene;Acc:420822]	15.5873	10.8323	8.41663	6.0437	1.2968	1.2155	4.07156	2.02558	0.00111177
MSTRG.40673	NARF	ENSGALT00000002433	GO:0005521(lamin binding);GO:0005634(nucleus);GO:0005638(lamin filament);GO:0005730(nucleolus);GO:0031981(nuclear lumen)	NA	nuclear prelamin A recognition factor [Source:NCBI gene;Acc:417341]	26.7715	32.3093	25.0659	5.92919	6.63837	8.17117	4.05747	2.02058	2.31112e-07
MSTRG.62457	SLC2A1	ENSGALT00000072050;ENSGALT00000049667	GO:0001939(female pronucleus);GO:0005215(transporter activity);GO:0005355(glucose transmembrane transporter activity);GO:0005737(cytoplasm);GO:0005829(cytosol);GO:0005886(plasma membrane);GO:0005887(integral component of plasma membrane);GO:0016020(membrane);GO:0016021(integral component of membrane);GO:0016323(basolateral plasma membrane);GO:0016324(apical plasma membrane);GO:0022857(transmembra…	04920(Adipocytokine signaling pathway);04920(Adipocytokine signaling pathway)	solute carrier family 2 member 1 [Source:NCBI gene;Acc:396130]	94.3886	96.4579	75.9277	18.2768	19.7092	28.2356	4.02851	2.01024	1.43678e-07
MSTRG.66395	MLLT6	ENSGALT00000071262	GO:0003014(renal system process);GO:0007588(excretion);GO:0010765(positive regulation of sodium ion transport);GO:0031491(nucleosome binding);GO:0035811(negative regulation of urine volume);GO:0035812(renal sodium excretion);GO:0036359(renal potassium excretion);GO:0042393(histone binding);GO:0045944(positive regulation of transcription by RNA polymerase II);GO:0046872(metal ion binding);GO:20011…	NA	MLLT6, PHD finger containing [Source:NCBI gene;Acc:419995]	1.38344	4.70672	2.45889	1.14289	0.528828	0.481817	3.96978	1.98906	0.00113058
MSTRG.84816	RASL11AL	ENSGALT00000086947	GO:0000166(nucleotide binding);GO:0003924(GTPase activity);GO:0005525(GTP binding);GO:0007165(signal transduction);GO:0016020(membrane)	NA	ras-like protein family member 11A-like [Source:NCBI gene;Acc:422321]	10.112	5.80483	1.88814	0.406144	2.00838	2.10534	3.93928	1.97793	0.00859742
MSTRG.25747	NDRG4	ENSGALT00000070962;ENSGALT00000046836;ENSGALT00000074634	GO:0005737(cytoplasm);GO:0007165(signal transduction);GO:0007420(brain development);GO:0070374(positive regulation of ERK1 and ERK2 cascade);GO:0070374(positive regulation of ERK1 and ERK2 cascade)	NA	NDRG family member 4 [Source:NCBI gene;Acc:768618]	3.60506	1.60316	0.536222	0.520302	0.456786	0.484981	3.92898	1.97416	0.02905
MSTRG.119933	FBXO45	ENSGALT00000104565	GO:0001764(neuron migration);GO:0004842(ubiquitin-protein transferase activity);GO:0005515(protein binding);GO:0006511(ubiquitin-dependent protein catabolic process);GO:0006974(cellular response to DNA damage stimulus);GO:0014069(postsynaptic density);GO:0016567(protein ubiquitination);GO:0019005(SCF ubiquitin ligase complex);GO:0021799(cerebral cortex radially oriented cell migration);GO:0021800…	NA	F-box protein 45 [Source:NCBI gene;Acc:770111]	21.3887	3.4418	4.4882	2.4412	2.59281	2.47941	3.90218	1.96428	0.00223645
MSTRG.117505	ENSGALG00000048056;ABCA4	ENSGALT00000099657;ENSGALT00000009238	GO:0016021(integral component of membrane);GO:0042626(ATPase activity, coupled to transmembrane movement of substances);GO:0055085(transmembrane transport);GO:0000166(nucleotide binding);GO:0001750(photoreceptor outer segment);GO:0004012(phospholipid-translocating ATPase activity);GO:0005319(lipid transporter activity);GO:0005524(ATP binding);GO:0005548(phospholipid transporter activity);GO:00066…	02010(ABC transporters)	ATP binding cassette subfamily A member 4 [Source:NCBI gene;Acc:424490]	8.07815	8.91748	3.19399	1.25487	1.43633	2.50883	3.8826	1.95702	6.68598e-05
MSTRG.117009	PTGS2	ENSGALT00000048282;ENSGALT00000068693;ENSGALT00000047966;ENSGALT00000067436	GO:0001516(prostaglandin biosynthetic process);GO:0004601(peroxidase activity);GO:0004666(prostaglandin-endoperoxide synthase activity);GO:0005737(cytoplasm);GO:0005783(endoplasmic reticulum);GO:0005789(endoplasmic reticulum membrane);GO:0006629(lipid metabolic process);GO:0006631(fatty acid metabolic process);GO:0006633(fatty acid biosynthetic process);GO:0006693(prostaglandin metabolic process)…	00590(Arachidonic acid metabolism);04370(VEGF signaling pathway);04625(C-type lectin receptor signaling pathway);04625(C-type lectin receptor signaling pathway)	prostaglandin-endoperoxide synthase 2 [Source:NCBI gene;Acc:396451]	4.01257	4.92705	3.64864	0.860021	0.864861	1.51815	3.88164	1.95667	6.70192e-05
MSTRG.103886	SNAPC1	ENSGALT00000019362	GO:0005634(nucleus);GO:0005730(nucleolus);GO:0019185(snRNA-activating protein complex);GO:0042795(snRNA transcription by RNA polymerase II);GO:0042796(snRNA transcription by RNA polymerase III);GO:0043565(sequence-specific DNA binding)	NA	small nuclear RNA activating complex polypeptide 1 [Source:NCBI gene;Acc:423517]	17.0355	15.1392	10.3792	2.33026	3.72508	5.16321	3.79317	1.92341	9.03707e-05
MSTRG.66728	ANGPTL4	ENSGALT00000000877;ENSGALT00000104951	GO:0001525(angiogenesis);GO:0004857(enzyme inhibitor activity);GO:0005576(extracellular region);GO:0005615(extracellular space);GO:0042802(identical protein binding);GO:0043066(negative regulation of apoptotic process);GO:0051005(negative regulation of lipoprotein lipase activity);GO:0070328(triglyceride homeostasis);GO:2000352(negative regulation of endothelial cell apoptotic process);GO:2000352…	03320(PPAR signaling pathway);03320(PPAR signaling pathway)	angiopoietin like 4 [Source:NCBI gene;Acc:769087]	35.4958	37.01	34.8828	11.263	4.45054	12.7684	3.77042	1.91472	1.44171e-05
MSTRG.64163	IGSF9B	ENSGALT00000096294;ENSGALT00000094962;ENSGALT00000002205	GO:0005515(protein binding);GO:0007156(homophilic cell adhesion via plasma membrane adhesion molecules);GO:0016020(membrane);GO:0016021(integral component of membrane);GO:0019900(kinase binding);GO:0030425(dendrite);GO:0043025(neuronal cell body);GO:0060077(inhibitory synapse);GO:0097151(positive regulation of inhibitory postsynaptic potential);GO:0098982(GABA-ergic synapse);GO:0099560(synaptic m…	NA	immunoglobulin superfamily member 9B [Source:NCBI gene;Acc:428237]	8.19499	8.72406	3.54139	1.71263	1.04439	2.72557	3.73189	1.89991	0.000297494
MSTRG.21483	SESN3	ENSGALT00000027810;ENSGALT00000104610;ENSGALT00000067294	GO:0005634(nucleus);GO:0005737(cytoplasm);GO:0016239(positive regulation of macroautophagy);GO:0016684(oxidoreductase activity, acting on peroxide as acceptor);GO:0031932(TORC2 complex);GO:0032868(response to insulin);GO:0034198(cellular response to amino acid starvation);GO:0038203(TORC2 signaling);GO:0042149(cellular response to glucose starvation);GO:0042593(glucose homeostasis);GO:0046626(reg…	04115(p53 signaling pathway);04115(p53 signaling pathway)	sestrin 3 [Source:NCBI gene;Acc:428089]	31.0444	31.4479	15.1374	5.06535	6.09659	9.91358	3.68341	1.88104	1.63554e-05
MSTRG.74338	PPP1R14C	ENSGALT00000079316	GO:0004865(protein serine/threonine phosphatase inhibitor activity);GO:0005737(cytoplasm);GO:0032515(negative regulation of phosphoprotein phosphatase activity);GO:0042325(regulation of phosphorylation)	NA	protein phosphatase 1 regulatory inhibitor subunit 14C [Source:NCBI gene;Acc:421630]	18.0463	18.4608	3.0987	1.08637	1.01337	9.01116	3.56459	1.83374	0.0302883
MSTRG.104339	ERO1A	ENSGALT00000020256	GO:0003756(protein disulfide isomerase activity);GO:0005783(endoplasmic reticulum);GO:0005789(endoplasmic reticulum membrane);GO:0006457(protein folding);GO:0015035(protein disulfide oxidoreductase activity);GO:0016491(oxidoreductase activity);GO:0016671(oxidoreductase activity, acting on a sulfur group of donors, disulfide as acceptor);GO:0019471(4-hydroxyproline metabolic process);GO:0022417(pr…	04141(Protein processing in endoplasmic reticulum)	endoplasmic reticulum oxidoreductase 1 alpha [Source:NCBI gene;Acc:423585]	36.6923	32.0094	20.8977	9.125	6.35741	9.86111	3.53539	1.82187	1.72988e-05
MSTRG.104370	BMP4	ENSGALT00000020316	GO:0000122(negative regulation of transcription by RNA polymerase II);GO:0000186(activation of MAPKK activity);GO:0001501(skeletal system development);GO:0001525(angiogenesis);GO:0001568(blood vessel development);GO:0001649(osteoblast differentiation);GO:0001656(metanephros development);GO:0001657(ureteric bud development);GO:0001658(branching involved in ureteric bud morphogenesis);GO:0001707(me…	04060(Cytokine-cytokine receptor interaction);04350(TGF-beta signaling pathway)	bone morphogenetic protein 4 [Source:NCBI gene;Acc:396165]	11.4131	18.2691	1.59717	2.05015	0.757669	6.09382	3.51389	1.81307	0.0336661
MSTRG.32832	ENSGALG00000053025	ENSGALT00000091707;ENSGALT00000096815	GO:0046872(metal ion binding);GO:0046872(metal ion binding)	NA	MAX dimerization protein 3 [Source:NCBI gene;Acc:427629]	2.05904	1.46397	4.43757	0.385929	0.598609	1.38294	3.36248	1.74952	0.0343589
MSTRG.4001	GRIP1	ENSGALT00000102781;ENSGALT00000064143;ENSGALT00000016088;ENSGALT00000106854	GO:0005515(protein binding);GO:0005886(plasma membrane);GO:0008022(protein C-terminus binding);GO:0008104(protein localization);GO:0016358(dendrite development);GO:0030159(receptor signaling complex scaffold activity);GO:0035259(glucocorticoid receptor binding);GO:0043005(neuron projection);GO:0045121(membrane raft);GO:0098887(neurotransmitter receptor transport, endosome to postsynaptic membrane…	NA	glutamate receptor interacting protein 1 [Source:NCBI gene;Acc:427863]	8.1538	9.96209	6.56701	1.676	2.27169	3.46479	3.32991	1.73548	0.000262846
MSTRG.63571	GRIK3	ENSGALT00000003274	GO:0001640(adenylate cyclase inhibiting G protein-coupled glutamate receptor activity);GO:0004970(ionotropic glutamate receptor activity);GO:0005216(ion channel activity);GO:0005886(plasma membrane);GO:0005887(integral component of plasma membrane);GO:0006811(ion transport);GO:0007196(adenylate cyclase-inhibiting G protein-coupled glutamate receptor signaling pathway);GO:0007215(glutamate recepto…	04080(Neuroactive ligand-receptor interaction)	glutamate ionotropic receptor kainate type subunit 3 [Source:NCBI gene;Acc:419619]	2.99378	2.5982	1.06333	0.734445	0.571116	0.693939	3.32849	1.73487	0.0184086
MSTRG.125752	FAM169A	ENSGALT00000024106;ENSGALT00000094857;ENSGALT00000103634	NA	NA	family with sequence similarity 169 member A [Source:NCBI gene;Acc:431595]	16.9079	14.5021	12.253	4.96542	3.6933	4.74394	3.25779	1.70389	1.30932e-05
MSTRG.42863	YPEL2	ENSGALT00000043623	GO:0046872(metal ion binding)	NA	yippee like 2 [Source:NCBI gene;Acc:417632]	6.0469	7.37827	7.39375	1.35259	2.7318	2.32654	3.24741	1.69929	0.000168577
MSTRG.7176	CCDC77	ENSGALT00000021201	GO:0005813(centrosome)	NA	coiled-coil domain containing 77 [Source:NCBI gene;Acc:418149]	4.50438	1.75772	4.20568	0.851666	1.03948	1.35186	3.2278	1.69055	0.0115907
MSTRG.66310	ENSGALG00000035369	ENSGALT00000059066	GO:0000188(inactivation of MAPK activity);GO:0004721(phosphoprotein phosphatase activity);GO:0004725(protein tyrosine phosphatase activity);GO:0005829(cytosol);GO:0006470(protein dephosphorylation);GO:0008138(protein tyrosine/serine/threonine phosphatase activity);GO:0016311(dephosphorylation);GO:0016787(hydrolase activity);GO:0016791(phosphatase activity);GO:0033549(MAP kinase phosphatase activi…	04010(MAPK signaling pathway)	dual specificity phosphatase 3 [Source:NCBI gene;Acc:425527]	9.27187	2.81653	2.30999	0.717194	0.603247	3.1577	3.21526	1.68494	0.0354969
MSTRG.33999	P4HA2	ENSGALT00000102412;ENSGALT00000010797;ENSGALT00000091334;ENSGALT00000095800	GO:0004656(procollagen-proline 4-dioxygenase activity);GO:0005506(iron ion binding);GO:0005515(protein binding);GO:0005654(nucleoplasm);GO:0005783(endoplasmic reticulum);GO:0005829(cytosol);GO:0016491(oxidoreductase activity);GO:0016702(oxidoreductase activity, acting on single donors with incorporation of molecular oxygen, incorporation of two atoms of oxygen);GO:0016705(oxidoreductase activity,…	00330(Arginine and proline metabolism);00330(Arginine and proline metabolism)	prolyl 4-hydroxylase subunit alpha 2 [Source:NCBI gene;Acc:416326]	22.0253	22.61	14.4653	5.14965	4.29476	9.23506	3.16393	1.66172	0.000119887
MSTRG.30090	SLC6A6	ENSGALT00000010371;ENSGALT00000083889;ENSGALT00000107487;ENSGALT00000099232;ENSGALT00000094201;ENSGALT00000094444;ENSGALT00000103514	GO:0005328(neurotransmitter:sodium symporter activity);GO:0005368(taurine transmembrane transporter activity);GO:0005369(taurine:sodium symporter activity);GO:0005886(plasma membrane);GO:0005887(integral component of plasma membrane);GO:0006836(neurotransmitter transport);GO:0015293(symporter activity);GO:0015734(taurine transport);GO:0016020(membrane);GO:0016021(integral component of membrane);G…	NA	solute carrier family 6 member 6 [Source:NCBI gene;Acc:416041]	36.6413	45.9738	21.303	7.20538	13.3857	12.6859	3.12282	1.64285	8.81657e-05
MSTRG.111255	ACKR3	ENSGALT00000033813	GO:0001525(angiogenesis);GO:0001570(vasculogenesis);GO:0004930(G protein-coupled receptor activity);GO:0005044(scavenger receptor activity);GO:0005768(endosome);GO:0005886(plasma membrane);GO:0005905(clathrin-coated pit);GO:0006935(chemotaxis);GO:0007165(signal transduction);GO:0007186(G protein-coupled receptor signaling pathway);GO:0009986(cell surface);GO:0015026(coreceptor activity);GO:001602…	04060(Cytokine-cytokine receptor interaction)	atypical chemokine receptor 3 [Source:NCBI gene;Acc:428997]	13.3961	14.341	11.2578	3.77673	3.12465	5.68557	3.09804	1.63136	0.000457426
MSTRG.119967	SNED1	ENSGALT00000102827;ENSGALT00000090493;ENSGALT00000050723	GO:0005509(calcium ion binding);GO:0005515(protein binding);GO:0007160(cell-matrix adhesion);GO:0007160(cell-matrix adhesion)	NA	sushi, nidogen and EGF like domains 1 [Source:NCBI gene;Acc:424846]	7.70354	8.94712	4.11002	2.86397	1.18545	2.69264	3.07928	1.62259	0.000762832
MSTRG.32716	STC2	ENSGALT00000040996	GO:0005179(hormone activity);GO:0005576(extracellular region);GO:0005783(endoplasmic reticulum);GO:0005794(Golgi apparatus);GO:0006874(cellular calcium ion homeostasis);GO:0006979(response to oxidative stress);GO:0010469(regulation of signaling receptor activity);GO:0010629(negative regulation of gene expression);GO:0019899(enzyme binding);GO:0020037(heme binding);GO:0030968(endoplasmic reticulum…	NA	stanniocalcin 2 [Source:NCBI gene;Acc:416208]	59.5584	86.28	53.2579	21.5159	17.4557	26.2076	3.0546	1.61098	6.61032e-05
MSTRG.71907	VEGFA	ENSGALT00000106991;ENSGALT00000016742;ENSGALT00000077832;ENSGALT00000065872	GO:0001525(angiogenesis);GO:0001666(response to hypoxia);GO:0001934(positive regulation of protein phosphorylation);GO:0001938(positive regulation of endothelial cell proliferation);GO:0001955(blood vessel maturation);GO:0002040(sprouting angiogenesis);GO:0003347(epicardial cell to mesenchymal cell transition);GO:0005172(vascular endothelial growth factor receptor binding);GO:0005615(extracellula…	04010(MAPK signaling pathway);04370(VEGF signaling pathway);04510(Focal adhesion);04933(AGE-RAGE signaling pathway in diabetic complications);04933(AGE-RAGE signaling pathway in diabetic complications)	vascular endothelial growth factor A [Source:NCBI gene;Acc:395909]	12.3228	15.3522	7.17252	3.71943	3.16739	4.6735	3.01441	1.59187	0.000234858
MSTRG.62549	CDS2	ENSGALT00000070522;ENSGALT00000096754	GO:0004605(phosphatidate cytidylyltransferase activity);GO:0005783(endoplasmic reticulum);GO:0005789(endoplasmic reticulum membrane);GO:0006629(lipid metabolic process);GO:0008654(phospholipid biosynthetic process);GO:0016020(membrane);GO:0016021(integral component of membrane);GO:0016024(CDP-diacylglycerol biosynthetic process);GO:0016740(transferase activity);GO:0016772(transferase activity, tr…	00564(Glycerophospholipid metabolism);04070(Phosphatidylinositol signaling system);04070(Phosphatidylinositol signaling system)	CDP-diacylglycerol synthase (phosphatidate cytidylyltransferase) 2 [Source:NCBI gene;Acc:419517]	32.2337	24.2719	20.6784	8.09165	10.5227	7.05395	3.00698	1.58831	3.60967e-05
MSTRG.58325	HAS2	ENSGALT00000074165	GO:0001570(vasculogenesis);GO:0005737(cytoplasm);GO:0005887(integral component of plasma membrane);GO:0008284(positive regulation of cell population proliferation);GO:0016020(membrane);GO:0016021(integral component of membrane);GO:0030212(hyaluronan metabolic process);GO:0030213(hyaluronan biosynthetic process);GO:0030335(positive regulation of cell migration);GO:0036120(cellular response to plat…	NA	hyaluronan synthase 2 [Source:NCBI gene;Acc:395594]	3.30819	3.6434	3.92056	0.224883	1.27825	2.13981	2.98444	1.57746	0.0352018
MSTRG.106558	P4HA1	ENSGALT00000006896;ENSGALT00000058801;ENSGALT00000083944	GO:0004656(procollagen-proline 4-dioxygenase activity);GO:0005506(iron ion binding);GO:0005515(protein binding);GO:0005739(mitochondrion);GO:0005783(endoplasmic reticulum);GO:0016222(procollagen-proline 4-dioxygenase complex);GO:0016491(oxidoreductase activity);GO:0016702(oxidoreductase activity, acting on single donors with incorporation of molecular oxygen, incorporation of two atoms of oxygen)…	00330(Arginine and proline metabolism);00330(Arginine and proline metabolism)	prolyl 4-hydroxylase subunit alpha 1 [Source:NCBI gene;Acc:423704]	33.2417	30.1917	14.3212	7.33676	7.37853	11.353	2.98273	1.57663	0.000183287
MSTRG.116195	gga-mir-181b-1;gga-mir-181a-1	ENSGALT00000035268;ENSGALT00000035272	NA	NA	gga-mir-181b-1 [Source:miRBase;Acc:MI0001219];gga-mir-181a-1 [Source:miRBase;Acc:MI0001218]	6.51704	6.79399	6.14865	1.92599	3.1149	1.51033	2.97039	1.57065	0.012492
MSTRG.115112	CXCR4	ENSGALT00000020184	GO:0001666(response to hypoxia);GO:0003779(actin binding);GO:0004930(G protein-coupled receptor activity);GO:0004950(chemokine receptor activity);GO:0005764(lysosome);GO:0005769(early endosome);GO:0005770(late endosome);GO:0005886(plasma membrane);GO:0006935(chemotaxis);GO:0006955(immune response);GO:0007154(cell communication);GO:0007165(signal transduction);GO:0007186(G protein-coupled receptor…	04020(Calcium signaling pathway);04060(Cytokine-cytokine receptor interaction);04144(Endocytosis);04672(Intestinal immune network for IgA production);04810(Regulation of actin cytoskeleton)	C-X-C motif chemokine receptor 4 [Source:NCBI gene;Acc:395324]	10.2078	9.14933	11.0787	3.56806	3.58851	3.09867	2.96784	1.56941	0.0007985
MSTRG.96738	ENSGALG00000046593	ENSGALT00000088854	GO:0005179(hormone activity);GO:0005576(extracellular region);GO:0010469(regulation of signaling receptor activity)	04080(Neuroactive ligand-receptor interaction);04270(Vascular smooth muscle contraction)	adrenomedullin [Source:NCBI gene;Acc:423042]	33.1756	19.2118	33.5792	10.2698	9.92493	9.05024	2.93954	1.55559	0.0010702
MSTRG.9580	GABARAPL1	ENSGALT00000023745	GO:0000045(autophagosome assembly);GO:0000421(autophagosome membrane);GO:0000422(autophagy of mitochondrion);GO:0005737(cytoplasm);GO:0005739(mitochondrion);GO:0005776(autophagosome);GO:0005829(cytosol);GO:0006914(autophagy);GO:0006995(cellular response to nitrogen starvation);GO:0030957(Tat protein binding);GO:0031625(ubiquitin protein ligase binding);GO:0050811(GABA receptor binding)	04068(FoxO signaling pathway);04136(Autophagy - other);04137(Mitophagy - animal);04140(Autophagy - animal);04371(Apelin signaling pathway);04621(NOD-like receptor signaling pathway)	GABA type A receptor associated protein like 1 [Source:NCBI gene;Acc:769118]	133.396	48.1297	71.6349	35.7574	40.1118	10.8796	2.91832	1.54514	0.00187268
MSTRG.99189	ENSGALG00000008469	ENSGALT00000013800;ENSGALT00000102354	GO:0004867(serine-type endopeptidase inhibitor activity);GO:0005515(protein binding);GO:0010951(negative regulation of endopeptidase activity);GO:0016020(membrane);GO:0016021(integral component of membrane);GO:0016021(integral component of membrane)	NA	serine peptidase inhibitor, Kunitz type 1 [Source:NCBI gene;Acc:423206]	9.57879	23.403	10.2579	5.13872	3.70598	5.98723	2.91531	1.54365	0.000604452
MSTRG.65654	WNT2B	ENSGALT00000059836	GO:0002062(chondrocyte differentiation);GO:0005102(signaling receptor binding);GO:0005109(frizzled binding);GO:0005576(extracellular region);GO:0005615(extracellular space);GO:0007275(multicellular organism development);GO:0008584(male gonad development);GO:0009267(cellular response to starvation);GO:0016055(Wnt signaling pathway);GO:0021871(forebrain regionalization);GO:0030182(neuron differenti…	04150(mTOR signaling pathway);04310(Wnt signaling pathway);04916(Melanogenesis)	Wnt family member 2B [Source:NCBI gene;Acc:374243]	15.7044	20.8711	9.45635	2.17768	1.67521	12.0887	2.88753	1.52983	0.0287828
MSTRG.61409	SNAI1	ENSGALT00000013010	GO:0000122(negative regulation of transcription by RNA polymerase II);GO:0000977(RNA polymerase II regulatory region sequence-specific DNA binding);GO:0001227(DNA-binding transcription repressor activity, RNA polymerase II-specific);GO:0001649(osteoblast differentiation);GO:0001707(mesoderm formation);GO:0001837(epithelial to mesenchymal transition);GO:0003198(epithelial to mesenchymal transition…	04520(Adherens junction)	snail family transcriptional repressor 1 [Source:NCBI gene;Acc:396047]	8.65885	8.10445	8.99769	2.80333	2.75625	3.58143	2.81817	1.49476	0.00244402
MSTRG.42752	PIGL	ENSGALT00000007156	GO:0000225(N-acetylglucosaminylphosphatidylinositol deacetylase activity);GO:0006506(GPI anchor biosynthetic process);GO:0016020(membrane);GO:0016021(integral component of membrane)	00563(Glycosylphosphatidylinositol (GPI)-anchor biosynthesis)	phosphatidylinositol glycan anchor biosynthesis class L [Source:NCBI gene;Acc:417600]	7.2206	5.82256	4.08881	1.84459	2.24525	2.04452	2.79279	1.48171	0.00392473
MSTRG.9377	CDCA3	ENSGALT00000023425;ENSGALT00000055758	GO:0005913(cell-cell adherens junction);GO:0005913(cell-cell adherens junction)	NA	cell division cycle associated 3 [Source:NCBI gene;Acc:770517]	24.7218	12.5155	22.3713	17.1737	1.52205	2.66522	2.79055	1.48055	0.0363819
MSTRG.81337	FDFT1	ENSGALT00000026894	GO:0004310(farnesyl-diphosphate farnesyltransferase activity);GO:0005789(endoplasmic reticulum membrane);GO:0006695(cholesterol biosynthetic process);GO:0006696(ergosterol biosynthetic process);GO:0008610(lipid biosynthetic process);GO:0009058(biosynthetic process);GO:0016021(integral component of membrane);GO:0016740(transferase activity);GO:0016765(transferase activity, transferring alkyl or ar…	00100(Steroid biosynthesis)	farnesyl-diphosphate farnesyltransferase 1 [Source:NCBI gene;Acc:422038]	64.7347	71.865	40.4001	16.185	15.3858	32.679	2.75486	1.46198	0.000806319
MSTRG.108666	ATP6V0E2	ENSGALT00000054688;ENSGALT00000033256	GO:0006811(ion transport);GO:0015078(proton transmembrane transporter activity);GO:0015991(ATP hydrolysis coupled proton transport);GO:0016020(membrane);GO:0016021(integral component of membrane);GO:0016787(hydrolase activity);GO:0033179(proton-transporting V-type ATPase, V0 domain);GO:0055085(transmembrane transport);GO:0055085(transmembrane transport)	00190(Oxidative phosphorylation);04145(Phagosome);04145(Phagosome)	ATPase H+ transporting V0 subunit e2 [Source:NCBI gene;Acc:769770]	3.14631	5.14353	6.09645	1.48605	2.74296	1.00386	2.74922	1.45902	0.0440645
MSTRG.115153	HNMT	ENSGALT00000020209;ENSGALT00000057311;ENSGALT00000057796	GO:0001695(histamine catabolic process);GO:0005737(cytoplasm);GO:0007420(brain development);GO:0008170(N-methyltransferase activity);GO:0032259(methylation);GO:0043005(neuron projection);GO:0046539(histamine N-methyltransferase activity);GO:0046539(histamine N-methyltransferase activity)	00340(Histidine metabolism);00340(Histidine metabolism)	histamine N-methyltransferase [Source:NCBI gene;Acc:424298]	2.94995	1.46158	2.58176	0.825516	0.586744	1.13155	2.74915	1.45898	0.010029
MSTRG.121367	P3H2	ENSGALT00000046911	GO:0005506(iron ion binding);GO:0005515(protein binding);GO:0005604(basement membrane);GO:0005783(endoplasmic reticulum);GO:0005794(Golgi apparatus);GO:0008285(negative regulation of cell population proliferation);GO:0016491(oxidoreductase activity);GO:0016529(sarcoplasmic reticulum);GO:0016705(oxidoreductase activity, acting on paired donors, with incorporation or reduction of molecular oxygen);…	NA	prolyl 3-hydroxylase 2 [Source:NCBI gene;Acc:414143]	11.9836	21.1087	9.10893	4.21141	3.3224	7.81747	2.74904	1.45893	0.00139822
MSTRG.106534	HK1	ENSGALT00000006719	GO:0000166(nucleotide binding);GO:0001678(cellular glucose homeostasis);GO:0002741(positive regulation of cytokine secretion involved in immune response);GO:0004340(glucokinase activity);GO:0004396(hexokinase activity);GO:0005524(ATP binding);GO:0005536(glucose binding);GO:0005739(mitochondrion);GO:0005829(cytosol);GO:0005975(carbohydrate metabolic process);GO:0006096(glycolytic process);GO:00088…	00010(Glycolysis / Gluconeogenesis);00051(Fructose and mannose metabolism);00052(Galactose metabolism);00500(Starch and sucrose metabolism);00520(Amino sugar and nucleotide sugar metabolism);00524(Neomycin, kanamycin and gentamicin biosynthesis);04910(Insulin signaling pathway)	hexokinase 1 [Source:NCBI gene;Acc:373889]	31.0784	40.6629	24.6578	10.3141	8.86348	16.038	2.7374	1.45281	0.000329434
MSTRG.48388	STARD3NL	ENSGALT00000084890;ENSGALT00000087935	GO:0005789(endoplasmic reticulum membrane);GO:0015485(cholesterol binding);GO:0016020(membrane);GO:0016021(integral component of membrane);GO:0031902(late endosome membrane);GO:0042803(protein homodimerization activity);GO:0043231(intracellular membrane-bounded organelle);GO:0044232(organelle membrane contact site);GO:0099044(vesicle tethering to endoplasmic reticulum);GO:0140284(endoplasmic reti…	NA	STARD3 N-terminal like [Source:NCBI gene;Acc:420730]	9.47957	19.131	17.9801	4.33119	7.23961	5.56764	2.71849	1.4428	0.00227161
MSTRG.119019	HOOK1	ENSGALT00000017699	GO:0003779(actin binding);GO:0005515(protein binding);GO:0005737(cytoplasm);GO:0005813(centrosome);GO:0005829(cytosol);GO:0007030(Golgi organization);GO:0007032(endosome organization);GO:0007040(lysosome organization);GO:0007286(spermatid development);GO:0008017(microtubule binding);GO:0008333(endosome to lysosome transport);GO:0015630(microtubule cytoskeleton);GO:0030705(cytoskeleton-dependent i…	NA	hook microtubule tethering protein 1 [Source:NCBI gene;Acc:424675]	5.44781	2.81825	4.14259	1.37489	1.25962	1.97344	2.69288	1.42915	0.00967347
MSTRG.25708	PLA2G15	ENSGALT00000069079	GO:0005615(extracellular space);GO:0005654(nucleoplasm);GO:0006629(lipid metabolic process);GO:0006650(glycerophospholipid metabolic process);GO:0006672(ceramide metabolic process);GO:0008374(O-acyltransferase activity);GO:0034638(phosphatidylcholine catabolic process);GO:0043231(intracellular membrane-bounded organelle);GO:0046338(phosphatidylethanolamine catabolic process);GO:0047499(calcium-in…	00564(Glycerophospholipid metabolism);04142(Lysosome)	phospholipase A2 group XV [Source:NCBI gene;Acc:768530]	40.4143	16.7743	30.5297	8.04	12.6698	12.3113	2.65644	1.40949	0.000934907
MSTRG.50132	ATXN1	ENSGALT00000099196;ENSGALT00000020748	GO:0000122(negative regulation of transcription by RNA polymerase II);GO:0003723(RNA binding);GO:0005515(protein binding);GO:0005634(nucleus);GO:0005654(nucleoplasm);GO:0005730(nucleolus);GO:0005737(cytoplasm);GO:0005829(cytosol);GO:0007420(brain development);GO:0007612(learning);GO:0007613(memory);GO:0008022(protein C-terminus binding);GO:0008266(poly(U) RNA binding);GO:0016363(nuclear matrix);G…	NA	ataxin 1 [Source:NCBI gene;Acc:420843]	11.8107	9.51981	5.65005	3.51351	2.28989	4.38712	2.64762	1.40469	0.00123384
MSTRG.8283	PARVB	ENSGALT00000022966;ENSGALT00000087649;ENSGALT00000102951;ENSGALT00000057912	GO:0003779(actin binding);GO:0005515(protein binding);GO:0005737(cytoplasm);GO:0005925(focal adhesion);GO:0007155(cell adhesion);GO:0007163(establishment or maintenance of cell polarity);GO:0015629(actin cytoskeleton);GO:0030027(lamellipodium);GO:0030031(cell projection assembly);GO:0030032(lamellipodium assembly);GO:0031532(actin cytoskeleton reorganization);GO:0034446(substrate adhesion-depende…	04510(Focal adhesion);04510(Focal adhesion)	parvin beta [Source:NCBI gene;Acc:418235]	46.5085	17.8858	48.8301	14.7604	18.6124	9.73796	2.62636	1.39307	0.00148425
MSTRG.65748	MAGI3	ENSGALT00000002807;ENSGALT00000101775	GO:0005515(protein binding);GO:0005737(cytoplasm);GO:0005911(cell-cell junction);GO:0007165(signal transduction);GO:0030054(cell junction);GO:0032947(protein-containing complex scaffold activity);GO:0046328(regulation of JNK cascade);GO:0046328(regulation of JNK cascade)	NA	membrane associated guanylate kinase, WW and PDZ domain containing 3 [Source:NCBI gene;Acc:419877]	16.5256	17.4892	8.17494	6.79558	3.22408	6.05595	2.62445	1.39202	0.00127093
MSTRG.65634	CTTNBP2NL	ENSGALT00000045948;ENSGALT00000095516;ENSGALT00000052064	GO:0006470(protein dephosphorylation);GO:0015629(actin cytoskeleton);GO:0016020(membrane);GO:0016021(integral component of membrane);GO:0032410(negative regulation of transporter activity);GO:0034763(negative regulation of transmembrane transport);GO:0051721(protein phosphatase 2A binding);GO:0051721(protein phosphatase 2A binding)	NA	CTTNBP2 N-terminal like [Source:NCBI gene;Acc:419870]	4.23608	3.53651	4.93736	1.63726	2.07227	1.19217	2.59296	1.3746	0.00121808
MSTRG.114381	SEMA5B	ENSGALT00000075814;ENSGALT00000019105;ENSGALT00000062580;ENSGALT00000057754;ENSGALT00000105496	GO:0001755(neural crest cell migration);GO:0005515(protein binding);GO:0016020(membrane);GO:0016021(integral component of membrane);GO:0030215(semaphorin receptor binding);GO:0030335(positive regulation of cell migration);GO:0045499(chemorepellent activity);GO:0048675(axon extension);GO:0048843(negative regulation of axon extension involved in axon guidance);GO:0050908(detection of light stimulus…	NA	semaphorin 5B [Source:NCBI gene;Acc:424248]	8.64784	9.8787	1.56615	2.89996	1.36341	3.55271	2.57069	1.36215	0.0273739
MSTRG.119152	PGM1	ENSGALT00000017947	GO:0000287(magnesium ion binding);GO:0004614(phosphoglucomutase activity);GO:0005975(carbohydrate metabolic process);GO:0006006(glucose metabolic process);GO:0015629(actin cytoskeleton);GO:0016868(intramolecular transferase activity, phosphotransferases);GO:0046872(metal ion binding);GO:0071704(organic substance metabolic process)	00010(Glycolysis / Gluconeogenesis);00030(Pentose phosphate pathway);00052(Galactose metabolism);00230(Purine metabolism);00500(Starch and sucrose metabolism);00520(Amino sugar and nucleotide sugar metabolism)	phosphoglucomutase 1 [Source:NCBI gene;Acc:424691]	14.367	10.7169	6.01794	5.16847	2.52063	4.46011	2.55998	1.35613	0.00625141
MSTRG.63835	HDAC1;LCK	ENSGALT00000084635;ENSGALT00000000635	GO:0000118(histone deacetylase complex);GO:0000122(negative regulation of transcription by RNA polymerase II);GO:0000785(chromatin);GO:0000790(nuclear chromatin);GO:0000792(heterochromatin);GO:0000976(transcription regulatory region sequence-specific DNA binding);GO:0000978(RNA polymerase II proximal promoter sequence-specific DNA binding);GO:0000979(RNA polymerase II core promoter sequence-speci…	04110(Cell cycle);04330(Notch signaling pathway)	histone deacetylase 1 [Source:NCBI gene;Acc:373961];LCK proto-oncogene, Src family tyrosine kinase [Source:NCBI gene;Acc:396460]	23.4128	31.6539	21.8253	10.2595	11.0348	8.78914	2.55595	1.35386	0.000154928
MSTRG.64812	ENSGALG00000054020;ENSGALG00000047672;ENSGALG00000028843;ENSGALG00000026987;F-KER	ENSGALT00000106614;ENSGALT00000102157;ENSGALT00000093740;ENSGALT00000045159;ENSGALT00000101943;ENSGALT00000043504;ENSGALT00000086245;ENSGALT00000044794	GO:0005200(structural constituent of cytoskeleton);GO:0005882(intermediate filament);GO:0007010(cytoskeleton organization);GO:0007010(cytoskeleton organization)	NA	Gallus gallus feather keratin 3-like (LOC100859191), mRNA. [Source:RefSeq mRNA;Acc:NM_001277808];feather keratin 1-like [Source:NCBI gene;Acc:107049929];feather keratin 1-like [Source:NCBI gene;Acc:426913];feather keratin 1-like [Source:NCBI gene;Acc:426914];feather keratin I [Source:NCBI gene;Acc:769269]	15.5524	23.4784	31.6629	11.8029	9.97531	5.91189	2.55303	1.35221	0.000832681
MSTRG.66521	P3H4	ENSGALT00000046092	GO:0005515(protein binding);GO:0005783(endoplasmic reticulum);GO:0017185(peptidyl-lysine hydroxylation);GO:0030199(collagen fibril organization);GO:0032964(collagen biosynthetic process);GO:0046849(bone remodeling);GO:1902494(catalytic complex)	NA	prolyl 3-hydroxylase family member 4 (non-enzymatic) [Source:NCBI gene;Acc:430099]	5.8643	5.74284	3.41166	1.01974	2.56969	2.29527	2.55218	1.35173	0.0259513
MSTRG.84658	GABRQ	ENSGALT00000055905	GO:0004888(transmembrane signaling receptor activity);GO:0004890(GABA-A receptor activity);GO:0005216(ion channel activity);GO:0005230(extracellular ligand-gated ion channel activity);GO:0005254(chloride channel activity);GO:0005886(plasma membrane);GO:0005887(integral component of plasma membrane);GO:0006811(ion transport);GO:0006821(chloride transport);GO:0007165(signal transduction);GO:0007268…	04080(Neuroactive ligand-receptor interaction)	gamma-aminobutyric acid type A receptor theta subunit [Source:NCBI gene;Acc:396288]	3.1801	3.68173	1.61566	1.21077	0.685732	1.42532	2.55206	1.35166	0.0254567
MSTRG.121209	LRRC15	ENSGALT00000071744	GO:0001968(fibronectin binding);GO:0005515(protein binding);GO:0005518(collagen binding);GO:0016020(membrane);GO:0016021(integral component of membrane);GO:0030335(positive regulation of cell migration);GO:0043236(laminin binding);GO:0046813(receptor-mediated virion attachment to host cell);GO:0062023(collagen-containing extracellular matrix);GO:1903077(negative regulation of protein localization…	NA	leucine rich repeat containing 15 [Source:HGNC Symbol;Acc:HGNC:20818]	7.27809	11.0516	9.13078	1.90635	2.87909	6.00877	2.544	1.3471	0.018799
MSTRG.3146	PNPLA8	ENSGALT00000015471	GO:0001516(prostaglandin biosynthetic process);GO:0005777(peroxisome);GO:0005778(peroxisomal membrane);GO:0006629(lipid metabolic process);GO:0006631(fatty acid metabolic process);GO:0008219(cell death);GO:0016020(membrane);GO:0016042(lipid catabolic process);GO:0016787(hydrolase activity);GO:0019369(arachidonic acid metabolic process);GO:0034638(phosphatidylcholine catabolic process);GO:0043651(…	NA	patatin like phospholipase domain containing 8 [Source:NCBI gene;Acc:417785]	23.7232	18.8071	17.4176	5.63378	10.3261	7.63119	2.54113	1.34547	0.000970239
MSTRG.122668	TIPARP	ENSGALT00000016682	GO:0001570(vasculogenesis);GO:0001822(kidney development);GO:0003950(NAD+ ADP-ribosyltransferase activity);GO:0005634(nucleus);GO:0006471(protein ADP-ribosylation);GO:0006807(nitrogen compound metabolic process);GO:0008209(androgen metabolic process);GO:0008210(estrogen metabolic process);GO:0008270(zinc ion binding);GO:0008585(female gonad development);GO:0009791(post-embryonic development);GO:0…	NA	TCDD inducible poly(ADP-ribose) polymerase [Source:NCBI gene;Acc:425026]	34.6656	30.3795	32.567	12.291	13.1011	13.6261	2.50171	1.32291	0.000221825
MSTRG.61637	ENSGALG00000001136	ENSGALT00000035200	GO:0000977(RNA polymerase II regulatory region sequence-specific DNA binding);GO:0001756(somitogenesis);GO:0003677(DNA binding);GO:0003714(transcription corepressor activity);GO:0005634(nucleus);GO:0006355(regulation of transcription, DNA-templated);GO:0007219(Notch signaling pathway);GO:0008134(transcription factor binding);GO:0030154(cell differentiation);GO:0043565(sequence-specific DNA bindin…	04330(Notch signaling pathway)	hairy and enhancer of split 5-like [Source:NCBI gene;Acc:419390]	17.3234	15.5009	11.1997	4.95357	4.0467	8.7447	2.48092	1.31088	0.00886055
MSTRG.43697	CSRNP1	ENSGALT00000044280	GO:0001228(DNA-binding transcription activator activity, RNA polymerase II-specific);GO:0003700(DNA-binding transcription factor activity);GO:0005634(nucleus);GO:0006355(regulation of transcription, DNA-templated);GO:0009791(post-embryonic development);GO:0043565(sequence-specific DNA binding);GO:0045944(positive regulation of transcription by RNA polymerase II);GO:0048008(platelet-derived growth…	NA	cysteine and serine rich nuclear protein 1 [Source:NCBI gene;Acc:420425]	14.2275	19.0475	5.32915	1.56521	5.675	8.40022	2.46823	1.30348	0.0465403
MSTRG.80054	RRM2	ENSGALT00000026525	GO:0004748(ribonucleoside-diphosphate reductase activity, thioredoxin disulfide as acceptor);GO:0005829(cytosol);GO:0005971(ribonucleoside-diphosphate reductase complex);GO:0008199(ferric iron binding);GO:0009262(deoxyribonucleotide metabolic process);GO:0009263(deoxyribonucleotide biosynthetic process);GO:0016491(oxidoreductase activity);GO:0042803(protein homodimerization activity);GO:0051259(p…	00230(Purine metabolism);00240(Pyrimidine metabolism);00480(Glutathione metabolism);00983(Drug metabolism - other enzymes);04115(p53 signaling pathway)	ribonucleotide reductase regulatory subunit M2 [Source:NCBI gene;Acc:421936]	63.4899	49.8058	66.636	21.1305	23.8067	28.8645	2.43804	1.28572	0.000639879
MSTRG.118000	SSX2IP	ENSGALT00000014255	GO:0007098(centrosome cycle);GO:0031252(cell leading edge);GO:0032991(protein-containing complex);GO:0034451(centriolar satellite);GO:0035020(regulation of Rac protein signal transduction);GO:0035735(intraciliary transport involved in cilium assembly);GO:0036064(ciliary basal body);GO:0060271(cilium assembly);GO:2000145(regulation of cell motility)	04520(Adherens junction)	SSX family member 2 interacting protein [Source:NCBI gene;Acc:424532]	8.59214	5.19397	8.21931	3.12754	3.37641	2.60045	2.41701	1.27322	0.00354434
MSTRG.66456	RARA	ENSGALT00000051814;ENSGALT00000086758	GO:0000122(negative regulation of transcription by RNA polymerase II);GO:0000790(nuclear chromatin);GO:0000977(RNA polymerase II regulatory region sequence-specific DNA binding);GO:0000978(RNA polymerase II proximal promoter sequence-specific DNA binding);GO:0001012(RNA polymerase II regulatory region DNA binding);GO:0001657(ureteric bud development);GO:0001843(neural tube closure);GO:0001972(ret…	NA	retinoic acid receptor alpha [Source:NCBI gene;Acc:395213]	11.4864	14.8657	7.78041	3.64602	1.38055	9.10276	2.41571	1.27245	0.0396554
MSTRG.119316	PDE4B	ENSGALT00000018074	GO:0004114(3',5'-cyclic-nucleotide phosphodiesterase activity);GO:0004115(3',5'-cyclic-AMP phosphodiesterase activity);GO:0005515(protein binding);GO:0005829(cytosol);GO:0007165(signal transduction);GO:0008081(phosphoric diester hydrolase activity);GO:0016787(hydrolase activity);GO:0030552(cAMP binding);GO:0044325(ion channel binding);GO:0046872(metal ion binding)	00230(Purine metabolism)	phosphodiesterase 4B [Source:NCBI gene;Acc:424700]	22.8128	21.7267	7.8177	8.01528	4.12516	9.77818	2.38871	1.25623	0.0102651
MSTRG.53024	GMNN	ENSGALT00000022169;ENSGALT00000043851	GO:0003682(chromatin binding);GO:0003714(transcription corepressor activity);GO:0005634(nucleus);GO:0005737(cytoplasm);GO:0005829(cytosol);GO:0006275(regulation of DNA replication);GO:0008156(negative regulation of DNA replication);GO:0009887(animal organ morphogenesis);GO:0010629(negative regulation of gene expression);GO:0035563(positive regulation of chromatin binding);GO:0042826(histone deace…	NA	geminin, DNA replication inhibitor [Source:NCBI gene;Acc:421004]	7.36519	8.42169	2.63884	2.78637	2.47097	2.533	2.3652	1.24196	0.0318173
MSTRG.27310	GPI	ENSGALT00000088941;ENSGALT00000007948;ENSGALT00000056464;ENSGALT00000085739	GO:0001707(mesoderm formation);GO:0004347(glucose-6-phosphate isomerase activity);GO:0005829(cytosol);GO:0005886(plasma membrane);GO:0006094(gluconeogenesis);GO:0006096(glycolytic process);GO:0016853(isomerase activity);GO:0016866(intramolecular transferase activity);GO:0034101(erythrocyte homeostasis);GO:0042593(glucose homeostasis);GO:0048029(monosaccharide binding);GO:0051156(glucose 6-phospha…	00010(Glycolysis / Gluconeogenesis);00030(Pentose phosphate pathway);00500(Starch and sucrose metabolism);00520(Amino sugar and nucleotide sugar metabolism);00520(Amino sugar and nucleotide sugar metabolism)	glucose-6-phosphate isomerase [Source:NCBI gene;Acc:415783]	172.143	161.853	165.436	94.0825	57.5361	59.5831	2.36472	1.24167	0.000429738
MSTRG.40854	SLC16A3	ENSGALT00000004306	GO:0005886(plasma membrane);GO:0005887(integral component of plasma membrane);GO:0008028(monocarboxylic acid transmembrane transporter activity);GO:0015129(lactate transmembrane transporter activity);GO:0015718(monocarboxylic acid transport);GO:0016020(membrane);GO:0016021(integral component of membrane);GO:0031965(nuclear membrane);GO:0035873(lactate transmembrane transport);GO:0055085(transmemb…	NA	solute carrier family 16 member 3 [Source:NCBI gene;Acc:395383]	55.9567	53.3759	50.4597	21.7251	23.6923	22.308	2.35941	1.23843	0.000307233
MSTRG.22179	AAMDC	ENSGALT00000066015;ENSGALT00000097178;ENSGALT00000083130;ENSGALT00000060312	GO:0005737(cytoplasm);GO:0045600(positive regulation of fat cell differentiation);GO:0045600(positive regulation of fat cell differentiation)	NA	adipogenesis associated, Mth938 domain containing [Source:NCBI gene;Acc:425610]	4.81426	4.36801	2.75494	1.02794	2.09478	1.94212	2.35687	1.23687	0.015699
MSTRG.62591	BNIP3L	ENSGALT00000086627;ENSGALT00000090587	GO:0005521(lamin binding);GO:0005635(nuclear envelope);GO:0005739(mitochondrion);GO:0005740(mitochondrial envelope);GO:0005741(mitochondrial outer membrane);GO:0005783(endoplasmic reticulum);GO:0016021(integral component of membrane);GO:0016239(positive regulation of macroautophagy);GO:0016607(nuclear speck);GO:0035694(mitochondrial protein catabolic process);GO:0042802(identical protein binding)…	04137(Mitophagy - animal);04137(Mitophagy - animal)	BCL2 interacting protein 3 like [Source:NCBI gene;Acc:419522]	70.1671	65.001	32.5453	19.1376	25.2964	26.9062	2.3509	1.23321	0.0019722
MSTRG.28617	ENSGALG00000002099	ENSGALT00000106892;ENSGALT00000103697;ENSGALT00000060362;ENSGALT00000048554;ENSGALT00000105481;ENSGALT00000003276;ENSGALT00000098781;ENSGALT00000059925	GO:0003824(catalytic activity);GO:0003873(6-phosphofructo-2-kinase activity);GO:0004331(fructose-2,6-bisphosphate 2-phosphatase activity);GO:0005524(ATP binding);GO:0005829(cytosol);GO:0006000(fructose metabolic process);GO:0006003(fructose 2,6-bisphosphate metabolic process);GO:0016311(dephosphorylation);GO:0046835(carbohydrate phosphorylation);GO:0046835(carbohydrate phosphorylation)	00051(Fructose and mannose metabolism);00051(Fructose and mannose metabolism)	6-phosphofructo-2-kinase/fructose-2,6-biphosphatase 4-like [Source:NCBI gene;Acc:100859653]	5.96153	7.70675	3.70734	3.45112	2.08495	1.87054	2.34596	1.23018	0.0083041
MSTRG.67097	GADD45B	ENSGALT00000065904	GO:0000185(activation of MAPKKK activity);GO:0000186(activation of MAPKK activity);GO:0005634(nucleus);GO:0005737(cytoplasm);GO:0006469(negative regulation of protein kinase activity);GO:0043065(positive regulation of apoptotic process);GO:0046330(positive regulation of JNK cascade);GO:0051726(regulation of cell cycle);GO:1900745(positive regulation of p38MAPK cascade)	04010(MAPK signaling pathway);04068(FoxO signaling pathway);04110(Cell cycle);04115(p53 signaling pathway);04210(Apoptosis);04218(Cellular senescence)	growth arrest and DNA damage inducible beta [Source:NCBI gene;Acc:100859853]	27.7808	34.4391	29.7923	10.0557	10.3747	18.8411	2.34298	1.22834	0.00298488
MSTRG.83240	DOCK11	ENSGALT00000009683;ENSGALT00000074876	GO:0001782(B cell homeostasis);GO:0002315(marginal zone B cell differentiation);GO:0005085(guanyl-nucleotide exchange factor activity);GO:0005089(Rho guanyl-nucleotide exchange factor activity);GO:0007264(small GTPase mediated signal transduction);GO:0017048(Rho GTPase binding);GO:0043547(positive regulation of GTPase activity);GO:0051491(positive regulation of filopodium assembly);GO:0051491(pos…	NA	dedicator of cytokinesis 11 [Source:NCBI gene;Acc:422229]	5.19945	3.21432	2.28256	1.36702	1.53392	1.69022	2.32976	1.22018	0.00931698
MSTRG.45929	UMAD1	ENSGALT00000037997;ENSGALT00000107743	NA	NA	UBAP1-MVB12-associated (UMA) domain containing 1 [Source:NCBI gene;Acc:107052569]	8.11925	10.7564	4.60444	5.55409	0.870941	3.66209	2.32773	1.21892	0.0480756
MSTRG.53676	FAM210A	ENSGALT00000105136;ENSGALT00000022517	GO:0005737(cytoplasm);GO:0005739(mitochondrion);GO:0016020(membrane);GO:0016021(integral component of membrane);GO:0016021(integral component of membrane)	NA	family with sequence similarity 210 member A [Source:NCBI gene;Acc:421045]	20.666	5.40935	6.53288	3.70582	3.34921	6.98936	2.3218	1.21524	0.0351885
MSTRG.34575	NPTX2	ENSGALT00000005641;ENSGALT00000064163	GO:0003674(molecular_function);GO:0005575(cellular_component);GO:0005886(plasma membrane);GO:0008150(biological_process);GO:0008306(associative learning);GO:0009898(cytoplasmic side of plasma membrane);GO:0030175(filopodium);GO:0030425(dendrite);GO:0030426(growth cone);GO:0031175(neuron projection development);GO:0043025(neuronal cell body);GO:0098962(regulation of postsynaptic neurotransmitter r…	NA	neuronal pentraxin 2 [Source:NCBI gene;Acc:416438]	12.7088	3.1428	15.6737	3.5507	5.90538	4.18316	2.31136	1.20875	0.0255026
MSTRG.82616	TIMELESS;ENSGALG00000050440	ENSGALT00000108263;ENSGALT00000103309;ENSGALT00000057040;ENSGALT00000107431;ENSGALT00000096581;ENSGALT00000105337;ENSGALT00000106283	GO:0000076(DNA replication checkpoint);GO:0000122(negative regulation of transcription by RNA polymerase II);GO:0000790(nuclear chromatin);GO:0002009(morphogenesis of an epithelium);GO:0003677(DNA binding);GO:0005634(nucleus);GO:0006281(DNA repair);GO:0006974(cellular response to DNA damage stimulus);GO:0007623(circadian rhythm);GO:0030324(lung development);GO:0031298(replication fork protection …	NA	timeless circadian regulator [Source:NCBI gene;Acc:101751192];apolipoprotein F [Source:NCBI gene;Acc:107055401]	5.88213	5.44231	3.11364	1.02713	1.22046	4.01041	2.30714	1.20611	0.0386
MSTRG.113441	LRP2	ENSGALT00000017651;ENSGALT00000102616	GO:0001843(neural tube closure);GO:0003139(secondary heart field specification);GO:0003148(outflow tract septum morphogenesis);GO:0003223(ventricular compact myocardium morphogenesis);GO:0003281(ventricular septum development);GO:0005509(calcium ion binding);GO:0005515(protein binding);GO:0005768(endosome);GO:0005783(endoplasmic reticulum);GO:0005794(Golgi apparatus);GO:0005903(brush border);GO:0…	04340(Hedgehog signaling pathway);04340(Hedgehog signaling pathway)	LDL receptor related protein 2 [Source:NCBI gene;Acc:424168]	21.1648	23.5856	10.7602	5.7909	5.95466	12.3433	2.30441	1.2044	0.00675851
MSTRG.15862	PLCXD1;ENSGALG00000016722	ENSGALT00000093371;ENSGALT00000026986;ENSGALT00000026984;ENSGALT00000097102	GO:0006629(lipid metabolic process);GO:0008081(phosphoric diester hydrolase activity);GO:0004341(gluconolactonase activity);GO:0005509(calcium ion binding);GO:0019853(L-ascorbic acid biosynthetic process);GO:0030234(enzyme regulator activity);GO:0050790(regulation of catalytic activity);GO:0008081(phosphoric diester hydrolase activity)	00030(Pentose phosphate pathway);00053(Ascorbate and aldarate metabolism)	phosphatidylinositol specific phospholipase C X domain containing 1 [Source:NCBI gene;Acc:418673];regucalcin-like [Source:NCBI gene;Acc:428008]	6.16106	2.75478	3.37887	2.12261	1.61633	1.5986	2.30344	1.20379	0.0138629
MSTRG.41641	P4HB	ENSGALT00000085103;ENSGALT00000055031	GO:0003756(protein disulfide isomerase activity);GO:0004656(procollagen-proline 4-dioxygenase activity);GO:0005178(integrin binding);GO:0005623(cell);GO:0005783(endoplasmic reticulum);GO:0005793(endoplasmic reticulum-Golgi intermediate compartment);GO:0009897(external side of plasma membrane);GO:0015037(peptide disulfide oxidoreductase activity);GO:0016222(procollagen-proline 4-dioxygenase comple…	04141(Protein processing in endoplasmic reticulum);04141(Protein processing in endoplasmic reticulum)	prolyl 4-hydroxylase subunit beta [Source:NCBI gene;Acc:374091]	97.5581	99.9752	64.3633	29.1693	29.7688	55.9642	2.2793	1.18859	0.0036357
MSTRG.31430	LMCD1	ENSGALT00000013590	GO:0000122(negative regulation of transcription by RNA polymerase II);GO:0003714(transcription corepressor activity);GO:0005634(nucleus);GO:0008270(zinc ion binding);GO:0010611(regulation of cardiac muscle hypertrophy);GO:0046872(metal ion binding);GO:0070886(positive regulation of calcineurin-NFAT signaling cascade)	NA	LIM and cysteine rich domains 1 [Source:NCBI gene;Acc:416113]	54.0784	70.0749	48.9043	20.892	19.4008	36.1047	2.26523	1.17966	0.00408118
MSTRG.35370	ARPC1B	ENSGALT00000063494;ENSGALT00000089759	GO:0003779(actin binding);GO:0005200(structural constituent of cytoskeleton);GO:0005515(protein binding);GO:0005737(cytoplasm);GO:0005856(cytoskeleton);GO:0005885(Arp2/3 protein complex);GO:0015629(actin cytoskeleton);GO:0030833(regulation of actin filament polymerization);GO:0034314(Arp2/3 complex-mediated actin nucleation);GO:0051015(actin filament binding);GO:0051015(actin filament binding)	04144(Endocytosis);04810(Regulation of actin cytoskeleton);05132(Salmonella infection);05132(Salmonella infection)	actin related protein 2/3 complex subunit 1B [Source:NCBI gene;Acc:416490]	5.58361	10.8104	7.30421	2.54765	2.02129	5.92173	2.25898	1.17567	0.0447188
MSTRG.85648	ENSGALG00000009063	ENSGALT00000014751	GO:0003677(DNA binding);GO:0003700(DNA-binding transcription factor activity);GO:0005634(nucleus);GO:0005667(transcription factor complex);GO:0005737(cytoplasm);GO:0006355(regulation of transcription, DNA-templated);GO:0046983(protein dimerization activity)	NA	PAS domain containing repressor 1 [Source:NCBI gene;Acc:422384]	4.04958	3.69154	3.33972	1.82571	0.842401	2.25471	2.25091	1.17051	0.0235756
MSTRG.63833	MARCKSL1	ENSGALT00000067813	GO:0005516(calmodulin binding);GO:0005886(plasma membrane);GO:0008284(positive regulation of cell population proliferation)	NA	MARCKS like 1 [Source:NCBI gene;Acc:770764]	46.6281	55.6077	57.381	21.4874	24.9526	24.5372	2.24885	1.16918	0.00176762
MSTRG.60006	SDC4	ENSGALT00000006265;ENSGALT00000093118	GO:0001843(neural tube closure);GO:0009986(cell surface);GO:0010762(regulation of fibroblast migration);GO:0016020(membrane);GO:0016021(integral component of membrane);GO:0016477(cell migration);GO:0042060(wound healing);GO:0042130(negative regulation of T cell proliferation);GO:0042802(identical protein binding);GO:0044319(wound healing, spreading of cells);GO:0060122(inner ear receptor cell ste…	04512(ECM-receptor interaction);04514(Cell adhesion molecules (CAMs));04514(Cell adhesion molecules (CAMs))	syndecan 4 [Source:NCBI gene;Acc:419184]	63.3211	63.8674	53.576	29.3878	24.9033	26.3119	2.24265	1.16521	0.000941309
MSTRG.69704	CHGB	ENSGALT00000084958	GO:0005615(extracellular space);GO:0030141(secretory granule);GO:2001032(regulation of double-strand break repair via nonhomologous end joining)	NA	chromogranin B [Source:NCBI gene;Acc:421312]	8.24256	6.36479	4.30829	2.30339	2.34507	3.87483	2.21929	1.1501	0.0210466
MSTRG.35080	MRM2	ENSGALT00000006743	GO:0001510(RNA methylation);GO:0005739(mitochondrion);GO:0008168(methyltransferase activity);GO:0008650(rRNA (uridine-2'-O-)-methyltransferase activity);GO:0031167(rRNA methylation);GO:0032259(methylation)	NA	mitochondrial rRNA methyltransferase 2 [Source:NCBI gene;Acc:416466]	10.1173	11.416	9.18573	4.52457	4.7546	4.62038	2.21008	1.1441	0.0256347
MSTRG.39723	CERCAM	ENSGALT00000095767;ENSGALT00000096361;ENSGALT00000007990	GO:0007155(cell adhesion);GO:0016020(membrane);GO:0016021(integral component of membrane);GO:0016021(integral component of membrane)	NA	cerebral endothelial cell adhesion molecule [Source:NCBI gene;Acc:427768]	7.6205	8.22321	2.78368	2.52701	1.45814	4.47253	2.20242	1.13909	0.0495277
MSTRG.106608	ADAMTS14	ENSGALT00000007138	GO:0004222(metalloendopeptidase activity);GO:0005576(extracellular region);GO:0006508(proteolysis);GO:0008233(peptidase activity);GO:0008237(metallopeptidase activity);GO:0008270(zinc ion binding);GO:0030199(collagen fibril organization);GO:0062023(collagen-containing extracellular matrix)	NA	ADAM metallopeptidase with thrombospondin type 1 motif 14 [Source:NCBI gene;Acc:423712]	14.5221	19.6011	4.59688	4.32268	3.76825	9.96752	2.14415	1.10041	0.046955
MSTRG.56557	CA2	ENSGALT00000052439	GO:0002009(morphogenesis of an epithelium);GO:0004064(arylesterase activity);GO:0004089(carbonate dehydratase activity);GO:0005623(cell);GO:0005737(cytoplasm);GO:0005829(cytosol);GO:0005886(plasma membrane);GO:0008270(zinc ion binding);GO:0015670(carbon dioxide transport);GO:0016020(membrane);GO:0016829(lyase activity);GO:0032230(positive regulation of synaptic transmission, GABAergic);GO:0032849…	00910(Nitrogen metabolism)	carbonic anhydrase 2 [Source:NCBI gene;Acc:396257]	162.855	176.343	81.6238	57.4513	44.0336	95.3397	2.13805	1.0963	0.0113356
MSTRG.113206	ENSGALG00000031069	ENSGALT00000048908	NA	NA	coiled-coil domain containing 173 [Source:NCBI gene;Acc:424161]	12.6943	7.03439	9.13986	3.45961	6.67922	3.36497	2.13781	1.09613	0.0272632
MSTRG.69920	CAPN2	ENSGALT00000015245	GO:0000785(chromatin);GO:0004198(calcium-dependent cysteine-type endopeptidase activity);GO:0005509(calcium ion binding);GO:0005622(intracellular);GO:0005634(nucleus);GO:0005737(cytoplasm);GO:0005764(lysosome);GO:0005783(endoplasmic reticulum);GO:0005794(Golgi apparatus);GO:0005829(cytosol);GO:0005886(plasma membrane);GO:0006508(proteolysis);GO:0007520(myoblast fusion);GO:0008233(peptidase activi…	04141(Protein processing in endoplasmic reticulum);04210(Apoptosis);04217(Necroptosis);04218(Cellular senescence);04510(Focal adhesion)	calpain 2 [Source:NCBI gene;Acc:395963]	17.2048	14.6615	8.80183	5.62433	6.08446	7.31966	2.13723	1.09574	0.0127362
MSTRG.91734	PAICS	ENSGALT00000056515;ENSGALT00000093621;ENSGALT00000022308;ENSGALT00000059706;ENSGALT00000100373;ENSGALT00000097634;ENSGALT00000052270	GO:0000166(nucleotide binding);GO:0003824(catalytic activity);GO:0004638(phosphoribosylaminoimidazole carboxylase activity);GO:0004639(phosphoribosylaminoimidazolesuccinocarboxamide synthase activity);GO:0005524(ATP binding);GO:0005829(cytosol);GO:0006164(purine nucleotide biosynthetic process);GO:0006189('de novo' IMP biosynthetic process);GO:0008152(metabolic process);GO:0016829(lyase activity)…	00230(Purine metabolism);00230(Purine metabolism)	phosphoribosylaminoimidazole carboxylase and phosphoribosylaminoimidazolesuccinocarboxamide synthase [Source:NCBI gene;Acc:396534]	13.8972	31.7748	35.4886	12.1342	12.3542	13.9806	2.10977	1.07708	0.00946535
MSTRG.39085	PPP1R10	ENSGALT00000103859;ENSGALT00000104550	GO:0000784(nuclear chromosome, telomeric region);GO:0000785(chromatin);GO:0005634(nucleus);GO:0005654(nucleoplasm);GO:0010667(negative regulation of cardiac muscle cell apoptotic process);GO:0016604(nuclear body);GO:0032206(positive regulation of telomere maintenance);GO:0072357(PTW/PP1 phosphatase complex);GO:1904290(negative regulation of mitotic DNA damage checkpoint);GO:1904290(negative regul…	NA	serine/threonine-protein phosphatase 1 regulatory subunit 10-like [Source:NCBI gene;Acc:100859302]	6.04032	11.064	5.34823	2.41634	3.19101	5.04496	2.10777	1.07572	0.0398572
MSTRG.34714	FAM20C	ENSGALT00000080528	GO:0001501(skeletal system development);GO:0004674(protein serine/threonine kinase activity);GO:0005509(calcium ion binding);GO:0005615(extracellular space);GO:0005794(Golgi apparatus);GO:0006468(protein phosphorylation);GO:0016020(membrane);GO:0016021(integral component of membrane);GO:0016773(phosphotransferase activity, alcohol group as acceptor);GO:0030145(manganese ion binding);GO:0030501(po…	NA	FAM20C, golgi associated secretory pathway kinase [Source:NCBI gene;Acc:416445]	11.2456	7.7247	6.66372	3.82398	3.84147	4.50006	2.1071	1.07526	0.0113072
MSTRG.109674	GRK5	ENSGALT00000015315	GO:0000166(nucleotide binding);GO:0004672(protein kinase activity);GO:0004674(protein serine/threonine kinase activity);GO:0004703(G protein-coupled receptor kinase activity);GO:0005524(ATP binding);GO:0005829(cytosol);GO:0005886(plasma membrane);GO:0006468(protein phosphorylation);GO:0007165(signal transduction);GO:0007217(tachykinin receptor signaling pathway);GO:0008284(positive regulation of …	04144(Endocytosis)	G protein-coupled receptor kinase 5 [Source:NCBI gene;Acc:423929]	13.0335	6.5128	4.64119	2.90468	4.28029	4.30466	2.10516	1.07393	0.0176563
MSTRG.125874	TMEM171	ENSGALT00000024224;ENSGALT00000103721;ENSGALT00000101944	GO:0016020(membrane);GO:0016021(integral component of membrane);GO:0016021(integral component of membrane)	NA	transmembrane protein 174 [Source:NCBI gene;Acc:768886]	7.19416	5.79851	7.60774	4.03489	3.43548	2.32817	2.1024	1.07204	0.0103302
MSTRG.129903	C9orf72	ENSGALT00000002894;ENSGALT00000091952	GO:0000932(P-body);GO:0001933(negative regulation of protein phosphorylation);GO:0005085(guanyl-nucleotide exchange factor activity);GO:0005615(extracellular space);GO:0005634(nucleus);GO:0005737(cytoplasm);GO:0005764(lysosome);GO:0005768(endosome);GO:0005776(autophagosome);GO:0006897(endocytosis);GO:0006914(autophagy);GO:0010494(cytoplasmic stress granule);GO:0010506(regulation of autophagy);GO:…	NA	chromosome Z C9orf72 homolog [Source:NCBI gene;Acc:427370]	5.67192	4.54195	6.12075	2.48064	3.22923	2.06066	2.10213	1.07185	0.0143876
MSTRG.13710	PDXK	ENSGALT00000095185;ENSGALT00000053468	GO:0000287(magnesium ion binding);GO:0005524(ATP binding);GO:0005654(nucleoplasm);GO:0008270(zinc ion binding);GO:0008283(cell population proliferation);GO:0008478(pyridoxal kinase activity);GO:0009443(pyridoxal 5'-phosphate salvage);GO:0016310(phosphorylation);GO:0030170(pyridoxal phosphate binding);GO:0030955(potassium ion binding);GO:0031402(sodium ion binding);GO:0031403(lithium ion binding);…	00750(Vitamin B6 metabolism);00750(Vitamin B6 metabolism)	pyridoxal kinase [Source:NCBI gene;Acc:418549]	24.1137	36.0956	20.1192	12.3729	8.40104	17.5032	2.09861	1.06943	0.0168943
MSTRG.61677	PANK4	ENSGALT00000001764	GO:0000166(nucleotide binding);GO:0004594(pantothenate kinase activity);GO:0005524(ATP binding);GO:0015937(coenzyme A biosynthetic process);GO:0016301(kinase activity);GO:0016310(phosphorylation);GO:0016740(transferase activity)	00770(Pantothenate and CoA biosynthesis)	pantothenate kinase 4 [Source:NCBI gene;Acc:100736561]	6.597	5.32519	4.61451	2.85565	2.7258	2.30307	2.09736	1.06858	0.00955491
MSTRG.13132	MRPS6	ENSGALT00000042992	GO:0003735(structural constituent of ribosome);GO:0005763(mitochondrial small ribosomal subunit);GO:0005840(ribosome);GO:0006412(translation);GO:0019843(rRNA binding);GO:0070181(small ribosomal subunit rRNA binding)	03010(Ribosome)	mitochondrial ribosomal protein S6 [Source:NCBI gene;Acc:427978]	13.0223	14.8955	9.26084	4.70756	6.61172	6.41227	2.09675	1.06815	0.00644199
MSTRG.119297	MCCC2L	ENSGALT00000018364;ENSGALT00000085301	GO:0004485(methylcrotonoyl-CoA carboxylase activity);GO:0005739(mitochondrion);GO:0006552(leucine catabolic process);GO:0016874(ligase activity);GO:1905202(methylcrotonoyl-CoA carboxylase complex);GO:1905202(methylcrotonoyl-CoA carboxylase complex)	00280(Valine, leucine and isoleucine degradation);00280(Valine, leucine and isoleucine degradation)	methylcrotonoyl-Coenzyme A carboxylase 2-like [Source:NCBI gene;Acc:429115]	9.13183	10.5278	6.03585	3.66606	3.09019	5.54758	2.08841	1.0624	0.0246528
MSTRG.76484	FOXO3	ENSGALT00000024687	GO:0000122(negative regulation of transcription by RNA polymerase II);GO:0000978(RNA polymerase II proximal promoter sequence-specific DNA binding);GO:0000981(DNA-binding transcription factor activity, RNA polymerase II-specific);GO:0001227(DNA-binding transcription repressor activity, RNA polymerase II-specific);GO:0001228(DNA-binding transcription activator activity, RNA polymerase II-specific)…	04068(FoxO signaling pathway);04137(Mitophagy - animal);04218(Cellular senescence)	forkhead box O3 [Source:NCBI gene;Acc:421769]	16.7707	16.419	8.22556	6.19228	5.73863	8.07283	2.07037	1.04989	0.0149776
MSTRG.48393	ENSGALG00000042063	ENSGALT00000065936	GO:0005509(calcium ion binding);GO:0005576(extracellular region);GO:0005764(lysosome);GO:0007160(cell-matrix adhesion)	NA	ependymin related 1 [Source:NCBI gene;Acc:420731]	12.1003	10.9768	6.05082	4.42076	5.91022	3.78465	2.06353	1.04511	0.0180664
MSTRG.50017	SIRT5	ENSGALT00000020720	GO:0005634(nucleus);GO:0005737(cytoplasm);GO:0005739(mitochondrion);GO:0005743(mitochondrial inner membrane);GO:0005758(mitochondrial intermembrane space);GO:0005759(mitochondrial matrix);GO:0005829(cytosol);GO:0006476(protein deacetylation);GO:0008270(zinc ion binding);GO:0010566(regulation of ketone biosynthetic process);GO:0016787(hydrolase activity);GO:0034979(NAD-dependent protein deacetylas…	NA	sirtuin 5 [Source:NCBI gene;Acc:420834]	8.0579	8.86254	4.51113	3.75163	2.8195	3.81616	2.06325	1.04492	0.0476617
MSTRG.82579	BANF1	ENSGALT00000073674	GO:0003677(DNA binding);GO:0005634(nucleus);GO:0005654(nucleoplasm);GO:0005737(cytoplasm);GO:0005829(cytosol);GO:0008022(protein C-terminus binding);GO:0015074(DNA integration);GO:0019899(enzyme binding);GO:0042802(identical protein binding);GO:0042803(protein homodimerization activity);GO:0045071(negative regulation of viral genome replication);GO:0047485(protein N-terminus binding);GO:0097726(L…	NA	barrier to autointegration factor 1 [Source:NCBI gene;Acc:777489]	99.5003	279.873	222.974	72.1143	84.5113	135.715	2.06043	1.04294	0.0286293
MSTRG.14100	PRRG1	ENSGALT00000026229	GO:0005509(calcium ion binding);GO:0005576(extracellular region);GO:0016020(membrane);GO:0016021(integral component of membrane)	NA	proline rich and Gla domain 1 [Source:NCBI gene;Acc:418582]	18.3045	26.4547	20.7576	6.24626	12.506	13.087	2.05773	1.04106	0.00877159
MSTRG.80036	KLF11	ENSGALT00000026523	GO:0000083(regulation of transcription involved in G1/S transition of mitotic cell cycle);GO:0000122(negative regulation of transcription by RNA polymerase II);GO:0000981(DNA-binding transcription factor activity, RNA polymerase II-specific);GO:0003676(nucleic acid binding);GO:0003700(DNA-binding transcription factor activity);GO:0005634(nucleus);GO:0005654(nucleoplasm);GO:0005829(cytosol);GO:000…	NA	Kruppel like factor 11 [Source:NCBI gene;Acc:421934]	21.7418	22.0899	20.5443	11.017	10.0552	10.3276	2.0502	1.03577	0.00513253
MSTRG.13275	RUNX1	ENSGALT00000095981;ENSGALT00000025809	GO:0000977(RNA polymerase II regulatory region sequence-specific DNA binding);GO:0000978(RNA polymerase II proximal promoter sequence-specific DNA binding);GO:0000981(DNA-binding transcription factor activity, RNA polymerase II-specific);GO:0001228(DNA-binding transcription activator activity, RNA polymerase II-specific);GO:0003677(DNA binding);GO:0003700(DNA-binding transcription factor activity…	04530(Tight junction);04530(Tight junction)	runt-related transcription factor 1 [Source:NCBI gene;Acc:396152]	12.0256	15.3074	9.97593	4.94571	5.02872	8.24275	2.04801	1.03422	0.0129612
MSTRG.97419	LDHA	ENSGALT00000075825;ENSGALT00000039415	GO:0003824(catalytic activity);GO:0004459(L-lactate dehydrogenase activity);GO:0005737(cytoplasm);GO:0005975(carbohydrate metabolic process);GO:0016491(oxidoreductase activity);GO:0016616(oxidoreductase activity, acting on the CH-OH group of donors, NAD or NADP as acceptor);GO:0019752(carboxylic acid metabolic process);GO:0055114(oxidation-reduction process);GO:0055114(oxidation-reduction process)	00010(Glycolysis / Gluconeogenesis);00270(Cysteine and methionine metabolism);00620(Pyruvate metabolism);00640(Propanoate metabolism);00640(Propanoate metabolism)	lactate dehydrogenase A [Source:NCBI gene;Acc:396221]	2308.16	2081.7	1347.49	780.484	702.737	1319.15	2.04732	1.03374	0.0094593
MSTRG.34152	PPP2R2B	ENSGALT00000012233;ENSGALT00000050176;ENSGALT00000072122	GO:0000159(protein phosphatase type 2A complex);GO:0000278(mitotic cell cycle);GO:0004722(protein serine/threonine phosphatase activity);GO:0005515(protein binding);GO:0005829(cytosol);GO:0019888(protein phosphatase regulator activity);GO:0043666(regulation of phosphoprotein phosphatase activity);GO:0070262(peptidyl-serine dephosphorylation);GO:0070262(peptidyl-serine dephosphorylation)	03015(mRNA surveillance pathway);04261(Adrenergic signaling in cardiomyocytes);04530(Tight junction);04530(Tight junction)	protein phosphatase 2 regulatory subunit Bbeta [Source:NCBI gene;Acc:416350]	14.1673	14.2913	10.3406	4.60627	4.18116	10.2655	2.03639	1.02602	0.0362143
MSTRG.24036	ENSGALG00000005011;ENSGALG00000048077	ENSGALT00000008025;ENSGALT00000091324	GO:0005515(protein binding);GO:0005886(plasma membrane);GO:0008284(positive regulation of cell population proliferation);GO:0030971(receptor tyrosine kinase binding);GO:0048863(stem cell differentiation);GO:0035556(intracellular signal transduction);GO:0048863(stem cell differentiation)	04012(ErbB signaling pathway);04510(Focal adhesion);04910(Insulin signaling pathway)	SHC adaptor protein 4 [Source:NCBI gene;Acc:426482]	11.7479	6.38944	5.21148	4.57629	2.29956	4.62081	2.03092	1.02213	0.0377035
MSTRG.7365	BPGM	ENSGALT00000021340	GO:0003824(catalytic activity);GO:0004082(bisphosphoglycerate mutase activity);GO:0004619(phosphoglycerate mutase activity);GO:0006096(glycolytic process);GO:0016853(isomerase activity);GO:0016868(intramolecular transferase activity, phosphotransferases)	00010(Glycolysis / Gluconeogenesis);00260(Glycine, serine and threonine metabolism)	bisphosphoglycerate mutase [Source:NCBI gene;Acc:418172]	62.8061	62.245	48.0929	25.9444	30.4796	28.8798	2.02973	1.02129	0.00384708
MSTRG.45896	RPA3	ENSGALT00000017404	GO:0000724(double-strand break repair via homologous recombination);GO:0003677(DNA binding);GO:0003684(damaged DNA binding);GO:0003697(single-stranded DNA binding);GO:0005634(nucleus);GO:0005662(DNA replication factor A complex);GO:0006260(DNA replication);GO:0006281(DNA repair);GO:0006284(base-excision repair);GO:0006289(nucleotide-excision repair);GO:0006298(mismatch repair);GO:0006310(DNA reco…	03030(DNA replication);03420(Nucleotide excision repair);03430(Mismatch repair);03440(Homologous recombination);03460(Fanconi anemia pathway)	replication protein A3 [Source:NCBI gene;Acc:420578]	14.7233	15.1916	11.3772	6.98874	6.08775	7.3509	2.02141	1.01536	0.0245098
MSTRG.67331	CFAP36	ENSGALT00000057119;ENSGALT00000095791;ENSGALT00000094816	GO:0035869(ciliary transition zone);GO:0047485(protein N-terminus binding);GO:0097546(ciliary base);GO:0097546(ciliary base)	NA	cilia and flagella associated protein 36 [Source:NCBI gene;Acc:421209]	20.7256	11.0691	21.3147	8.20606	11.8811	6.22517	2.01842	1.01323	0.017795
MSTRG.122860	GYG1	ENSGALT00000074046	GO:0005978(glycogen biosynthetic process);GO:0008466(glycogenin glucosyltransferase activity);GO:0016740(transferase activity);GO:0016757(transferase activity, transferring glycosyl groups);GO:0030145(manganese ion binding);GO:0042803(protein homodimerization activity);GO:0102751(UDP-alpha-D-glucose:glucosyl-glycogenin alpha-D-glucosyltransferase activity)	00500(Starch and sucrose metabolism)	glycogenin 1 [Source:NCBI gene;Acc:425050]	20.4451	23.2214	16.8877	7.95917	9.02995	13.2754	2.00083	1.0006	0.0163776
MSTRG.44240	PFKP	ENSGALT00000058038;ENSGALT00000011246;ENSGALT00000051117	GO:0000166(nucleotide binding);GO:0003824(catalytic activity);GO:0003872(6-phosphofructokinase activity);GO:0005524(ATP binding);GO:0005737(cytoplasm);GO:0005829(cytosol);GO:0005945(6-phosphofructokinase complex);GO:0006002(fructose 6-phosphate metabolic process);GO:0006007(glucose catabolic process);GO:0006096(glycolytic process);GO:0008152(metabolic process);GO:0016208(AMP binding);GO:0016301(k…	00010(Glycolysis / Gluconeogenesis);00030(Pentose phosphate pathway);00051(Fructose and mannose metabolism);00052(Galactose metabolism);03018(RNA degradation);03018(RNA degradation)	phosphofructokinase, platelet [Source:NCBI gene;Acc:428411]	40.877	43.7209	30.3603	15.3035	18.6037	23.6439	1.9975	0.998195	0.0071953
MSTRG.80802	RHOB	ENSGALT00000026595	GO:0000166(nucleotide binding);GO:0000281(mitotic cytokinesis);GO:0003924(GTPase activity);GO:0005525(GTP binding);GO:0005622(intracellular);GO:0005634(nucleus);GO:0005737(cytoplasm);GO:0005769(early endosome);GO:0005770(late endosome);GO:0005886(plasma membrane);GO:0005938(cell cortex);GO:0006886(intracellular protein transport);GO:0007015(actin filament organization);GO:0007155(cell adhesion);G…	NA	ras homolog family member B [Source:NCBI gene;Acc:395734]	35.7932	36.5467	40.9544	18.5793	21.8173	16.9758	1.97472	0.981647	0.00681952
MSTRG.119721	HS6ST1	ENSGALT00000003376	GO:0001525(angiogenesis);GO:0008146(sulfotransferase activity);GO:0015012(heparan sulfate proteoglycan biosynthetic process);GO:0015015(heparan sulfate proteoglycan biosynthetic process, enzymatic modification);GO:0016020(membrane);GO:0016021(integral component of membrane);GO:0016740(transferase activity);GO:0017095(heparan sulfate 6-O-sulfotransferase activity);GO:0048286(lung alveolus developm…	00534(Glycosaminoglycan biosynthesis - heparan sulfate / heparin)	heparan sulfate 6-O-sulfotransferase 1 [Source:NCBI gene;Acc:395141]	22.0827	25.5538	12.5237	10.3755	5.48384	14.6568	1.97143	0.979239	0.0425366
MSTRG.74178	STXBP5	ENSGALT00000100508;ENSGALT00000108180;ENSGALT00000104041;ENSGALT00000020159;ENSGALT00000090462;ENSGALT00000103481	GO:0005096(GTPase activator activity);GO:0005515(protein binding);GO:0005737(cytoplasm);GO:0005829(cytosol);GO:0005886(plasma membrane);GO:0016021(integral component of membrane);GO:0016192(vesicle-mediated transport);GO:0017137(Rab GTPase binding);GO:0017157(regulation of exocytosis);GO:0019905(syntaxin binding);GO:0031201(SNARE complex);GO:0043547(positive regulation of GTPase activity);GO:0043…	NA	syntaxin binding protein 5 [Source:NCBI gene;Acc:421620]	26.0537	20.8249	19.5545	10.4908	11.0065	12.2386	1.96922	0.977621	0.00689695
MSTRG.65139	KDM5B	ENSGALT00000091718;ENSGALT00000056356;ENSGALT00000071675	GO:0003677(DNA binding);GO:0003714(transcription corepressor activity);GO:0005634(nucleus);GO:0005829(cytosol);GO:0006325(chromatin organization);GO:0006338(chromatin remodeling);GO:0007338(single fertilization);GO:0008270(zinc ion binding);GO:0009791(post-embryonic development);GO:0010628(positive regulation of gene expression);GO:0016491(oxidoreductase activity);GO:0032452(histone demethylase a…	NA	lysine demethylase 5B [Source:NCBI gene;Acc:421168]	22.1325	26.6947	16.7892	9.71642	10.4363	13.2001	1.96735	0.97625	0.00879361
MSTRG.108103	VSTM4	ENSGALT00000009968	GO:0016020(membrane);GO:0016021(integral component of membrane)	NA	V-set and transmembrane domain containing 4 [Source:NCBI gene;Acc:423782]	7.26908	6.67059	4.62246	3.84019	2.63667	2.97577	1.9637	0.973574	0.0179637
MSTRG.63685	SFPQ	ENSGALT00000057988	GO:0000122(negative regulation of transcription by RNA polymerase II);GO:0000380(alternative mRNA splicing, via spliceosome);GO:0000724(double-strand break repair via homologous recombination);GO:0000785(chromatin);GO:0000976(transcription regulatory region sequence-specific DNA binding);GO:0000980(RNA polymerase II distal enhancer sequence-specific DNA binding);GO:0002218(activation of innate im…	NA	splicing factor proline and glutamine rich [Source:NCBI gene;Acc:395803]	19.7205	14.946	10.6039	5.64056	6.5351	10.9818	1.9549	0.967092	0.018901
MSTRG.33998	PDLIM4	ENSGALT00000081675	GO:0001725(stress fiber);GO:0005515(protein binding);GO:0005634(nucleus);GO:0005737(cytoplasm);GO:0005768(endosome);GO:0005856(cytoskeleton);GO:0016020(membrane);GO:0019903(protein phosphatase binding);GO:0030027(lamellipodium);GO:0030054(cell junction);GO:0031532(actin cytoskeleton reorganization);GO:0031901(early endosome membrane);GO:0031905(early endosome lumen);GO:0031941(filamentous actin);…	NA	PDZ and LIM domain 4 [Source:NCBI gene;Acc:395643]	24.6752	34.5097	19.1826	10.6925	9.35852	20.0924	1.95219	0.965092	0.0253525
MSTRG.10753	MYH15	ENSGALT00000036887	GO:0000166(nucleotide binding);GO:0003774(motor activity);GO:0003779(actin binding);GO:0005515(protein binding);GO:0005524(ATP binding);GO:0016459(myosin complex);GO:0051015(actin filament binding)	04260(Cardiac muscle contraction);04261(Adrenergic signaling in cardiomyocytes)	myosin, heavy chain 15 [Source:NCBI gene;Acc:395534]	5.75912	4.40006	2.72888	1.89621	1.50894	3.21288	1.94742	0.961561	0.0284393
MSTRG.63035	RPS6KA1L	ENSGALT00000047037;ENSGALT00000073238;ENSGALT00000074158;ENSGALT00000092159;ENSGALT00000099658;ENSGALT00000102291	GO:0000166(nucleotide binding);GO:0000287(magnesium ion binding);GO:0004672(protein kinase activity);GO:0004674(protein serine/threonine kinase activity);GO:0004711(ribosomal protein S6 kinase activity);GO:0004712(protein serine/threonine/tyrosine kinase activity);GO:0005524(ATP binding);GO:0005634(nucleus);GO:0005829(cytosol);GO:0006468(protein phosphorylation);GO:0006915(apoptotic process);GO:0…	04010(MAPK signaling pathway);04114(Oocyte meiosis);04150(mTOR signaling pathway);04914(Progesterone-mediated oocyte maturation);04914(Progesterone-mediated oocyte maturation)	ribosomal protein S6 kinase A1-like [Source:NCBI gene;Acc:386579]	6.45693	3.99697	4.40741	2.37211	2.38845	2.88225	1.94448	0.959387	0.0328829
MSTRG.54799	MAPRE2	ENSGALT00000047687;ENSGALT00000065820	GO:0005515(protein binding);GO:0005874(microtubule);GO:0005925(focal adhesion);GO:0008017(microtubule binding);GO:0015630(microtubule cytoskeleton);GO:0019901(protein kinase binding);GO:0032014(positive regulation of ARF protein signal transduction);GO:0035371(microtubule plus-end);GO:0042802(identical protein binding);GO:0043547(positive regulation of GTPase activity);GO:0051549(positive regulat…	NA	microtubule associated protein RP/EB family member 2 [Source:NCBI gene;Acc:421105]	52.5414	58.051	36.3745	22.4297	21.8656	31.4813	1.93948	0.955668	0.0112469
MSTRG.50034	JARID2	ENSGALT00000020740	GO:0000122(negative regulation of transcription by RNA polymerase II);GO:0000977(RNA polymerase II regulatory region sequence-specific DNA binding);GO:0001227(DNA-binding transcription repressor activity, RNA polymerase II-specific);GO:0001889(liver development);GO:0003677(DNA binding);GO:0003682(chromatin binding);GO:0005634(nucleus);GO:0005739(mitochondrion);GO:0006338(chromatin remodeling);GO:…	NA	jumonji and AT-rich interaction domain containing 2 [Source:NCBI gene;Acc:420839]	8.0924	9.12977	5.07085	4.04347	2.986	4.49071	1.93513	0.952429	0.019058
MSTRG.20341	DCLK1	ENSGALT00000108313;ENSGALT00000091572;ENSGALT00000095393;ENSGALT00000082498	GO:0001764(neuron migration);GO:0004672(protein kinase activity);GO:0005524(ATP binding);GO:0006468(protein phosphorylation);GO:0007409(axonogenesis);GO:0007420(brain development);GO:0009615(response to virus);GO:0014069(postsynaptic density);GO:0018105(peptidyl-serine phosphorylation);GO:0021952(central nervous system projection neuron axonogenesis);GO:0030900(forebrain development);GO:0035556(i…	NA	doublecortin like kinase 1 [Source:NCBI gene;Acc:418903]	10.8231	7.43285	4.78801	3.72407	2.93765	5.26687	1.93183	0.949968	0.0268465
MSTRG.107753	HELLS	ENSGALT00000098981;ENSGALT00000106776;ENSGALT00000008749	GO:0000775(chromosome, centromeric region);GO:0001655(urogenital system development);GO:0003682(chromatin binding);GO:0005524(ATP binding);GO:0005634(nucleus);GO:0005721(pericentric heterochromatin);GO:0006306(DNA methylation);GO:0006342(chromatin silencing);GO:0006346(methylation-dependent chromatin silencing);GO:0007275(multicellular organism development);GO:0010216(maintenance of DNA methylati…	NA	helicase, lymphoid specific [Source:NCBI gene;Acc:423750]	18.7778	14.137	11.1474	7.75825	6.76862	8.38988	1.92271	0.943142	0.0102454
MSTRG.63203	RLF	ENSGALT00000095751;ENSGALT00000001264	GO:0003676(nucleic acid binding);GO:0015074(DNA integration);GO:0044030(regulation of DNA methylation);GO:0051276(chromosome organization);GO:0097692(histone H3-K4 monomethylation);GO:0097692(histone H3-K4 monomethylation)	NA	rearranged L-myc fusion [Source:NCBI gene;Acc:419573]	21.2549	14.9393	11.2304	13.158	6.44127	5.22539	1.91039	0.933865	0.0236277
MSTRG.4351	KCNC2	ENSGALT00000016589;ENSGALT00000048870;ENSGALT00000095053;ENSGALT00000104772	GO:0005216(ion channel activity);GO:0005244(voltage-gated ion channel activity);GO:0005249(voltage-gated potassium channel activity);GO:0005251(delayed rectifier potassium channel activity);GO:0005267(potassium channel activity);GO:0005515(protein binding);GO:0006811(ion transport);GO:0006813(potassium ion transport);GO:0008076(voltage-gated potassium channel complex);GO:0016020(membrane);GO:0016…	NA	potassium voltage-gated channel subfamily C member 2 [Source:NCBI gene;Acc:772061]	7.09589	8.39845	5.43065	2.41017	4.16107	4.38963	1.90906	0.932864	0.0354569
MSTRG.65661	SLC16A1	ENSGALT00000002634	GO:0005813(centrosome);GO:0005886(plasma membrane);GO:0005887(integral component of plasma membrane);GO:0006629(lipid metabolic process);GO:0007098(centrosome cycle);GO:0008028(monocarboxylic acid transmembrane transporter activity);GO:0015129(lactate transmembrane transporter activity);GO:0015718(monocarboxylic acid transport);GO:0016020(membrane);GO:0016021(integral component of membrane);GO:00…	NA	solute carrier family 16 member 1 [Source:NCBI gene;Acc:419875]	121.442	132.036	94.3084	58.6475	58.4799	66.0456	1.89868	0.924993	0.00807054
MSTRG.47782	gga-mir-138-1	ENSGALT00000028990	NA	NA	gga-mir-138-1 [Source:miRBase;Acc:MI0001191]	8.03433	11.183	8.63275	4.3336	4.35866	6.01551	1.89356	0.921104	0.0295719
MSTRG.130662	SNCAIP	ENSGALT00000058340;ENSGALT00000093200;ENSGALT00000008552	GO:0005515(protein binding);GO:0005654(nucleoplasm);GO:0005737(cytoplasm);GO:0008219(cell death);GO:0031625(ubiquitin protein ligase binding);GO:0036464(cytoplasmic ribonucleoprotein granule);GO:0042417(dopamine metabolic process);GO:0042802(identical protein binding);GO:0046928(regulation of neurotransmitter secretion);GO:0090083(regulation of inclusion body assembly);GO:0090083(regulation of in…	NA	synuclein alpha interacting protein [Source:NCBI gene;Acc:426796]	3.64964	3.89225	3.0794	1.77094	1.50541	2.33363	1.89328	0.920891	0.0436621
MSTRG.107964	SCD	ENSGALT00000079625	GO:0006629(lipid metabolic process);GO:0006633(fatty acid biosynthetic process);GO:0016020(membrane);GO:0016021(integral component of membrane);GO:0016491(oxidoreductase activity);GO:0016717(oxidoreductase activity, acting on paired donors, with oxidation of a pair of donors resulting in the reduction of molecular oxygen to two molecules of water);GO:0055114(oxidation-reduction process)	01040(Biosynthesis of unsaturated fatty acids);03320(PPAR signaling pathway)	stearoyl-CoA desaturase [Source:NCBI gene;Acc:395706]	12.9685	15.2816	8.82404	6.38295	4.25862	8.95879	1.8915	0.919532	0.0311203
MSTRG.74325	NUP43	ENSGALT00000020225	GO:0000776(kinetochore);GO:0005515(protein binding);GO:0031080(nuclear pore outer ring)	NA	nucleoporin 43 [Source:HGNC Symbol;Acc:HGNC:21182]	22.4985	17.1586	20.0949	10.7932	10.5414	10.4455	1.88017	0.91086	0.0142357
MSTRG.73519	KIF25	ENSGALT00000018431	GO:0000166(nucleotide binding);GO:0003774(motor activity);GO:0003777(microtubule motor activity);GO:0005524(ATP binding);GO:0005871(kinesin complex);GO:0005874(microtubule);GO:0007018(microtubule-based movement);GO:0008017(microtubule binding);GO:0010507(negative regulation of autophagy);GO:0016887(ATPase activity);GO:0046603(negative regulation of mitotic centrosome separation);GO:0051294(establ…	NA	kinesin family member 25 [Source:NCBI gene;Acc:421563]	11.2684	15.3002	11.0474	6.49856	4.98693	8.63821	1.86924	0.902452	0.0188523
MSTRG.35148	SDK1	ENSGALT00000083692	GO:0005515(protein binding);GO:0016020(membrane);GO:0016021(integral component of membrane);GO:0048148(behavioral response to cocaine);GO:0060998(regulation of dendritic spine development)	NA	sidekick cell adhesion molecule 1 [Source:NCBI gene;Acc:373894]	2.00252	1.62603	1.20859	0.685557	0.912193	0.995775	1.86509	0.899242	0.0478178
MSTRG.120642	PID1	ENSGALT00000068898	GO:0001933(negative regulation of protein phosphorylation);GO:0005515(protein binding);GO:0005737(cytoplasm);GO:0010628(positive regulation of gene expression);GO:0042127(regulation of cell population proliferation);GO:0044320(cellular response to leptin stimulus);GO:0045944(positive regulation of transcription by RNA polymerase II);GO:0046325(negative regulation of glucose import);GO:0046627(neg…	NA	phosphotyrosine interaction domain containing 1 [Source:NCBI gene;Acc:424787]	26.423	20.4326	17.0886	10.6104	10.6479	13.103	1.86094	0.896031	0.0249193
MSTRG.34572	BAIAP2L1	ENSGALT00000005611	GO:0005515(protein binding);GO:0005654(nucleoplasm);GO:0005829(cytosol);GO:0005886(plasma membrane);GO:0007009(plasma membrane organization);GO:0009617(response to bacterium);GO:0015629(actin cytoskeleton);GO:0030833(regulation of actin filament polymerization);GO:0030838(positive regulation of actin filament polymerization);GO:0046626(regulation of insulin receptor signaling pathway);GO:0051017(…	NA	BAI1 associated protein 2 like 1 [Source:NCBI gene;Acc:416437]	61.186	61.5063	53.8025	33.8169	27.599	33.8171	1.85329	0.890092	0.0117515
MSTRG.99001	ARHGAP1	ENSGALT00000105060;ENSGALT00000092642;ENSGALT00000102802;ENSGALT00000053465;ENSGALT00000079282	GO:0005096(GTPase activator activity);GO:0005737(cytoplasm);GO:0007165(signal transduction);GO:0007264(small GTPase mediated signal transduction);GO:0010008(endosome membrane);GO:0016020(membrane);GO:0016021(integral component of membrane);GO:0016197(endosomal transport);GO:0017137(Rab GTPase binding);GO:0033572(transferrin transport);GO:0043547(positive regulation of GTPase activity);GO:0048471(…	NA	Rho GTPase activating protein 1 [Source:NCBI gene;Acc:428865]	22.5809	18.0232	21.2713	16.8043	5.97897	10.7301	1.84628	0.884625	0.0279957
MSTRG.94779	KDM3A	ENSGALT00000037139	GO:0000785(chromatin);GO:0000976(transcription regulatory region sequence-specific DNA binding);GO:0000979(RNA polymerase II core promoter sequence-specific DNA binding);GO:0003700(DNA-binding transcription factor activity);GO:0005506(iron ion binding);GO:0005634(nucleus);GO:0005654(nucleoplasm);GO:0005737(cytoplasm);GO:0007283(spermatogenesis);GO:0007290(spermatid nucleus elongation);GO:0009755(…	NA	lysine demethylase 3A [Source:NCBI gene;Acc:422917]	37.6981	29.6856	29.9943	16.2997	19.4195	17.0441	1.84557	0.884063	0.0108213
MSTRG.118335	ENSGALG00000010074	ENSGALT00000016376	GO:0005634(nucleus);GO:0005721(pericentric heterochromatin);GO:0006338(chromatin remodeling);GO:0014898(cardiac muscle hypertrophy in response to stress);GO:0016577(histone demethylation);GO:0032452(histone demethylase activity);GO:0032454(histone demethylase activity (H3-K9 specific));GO:0033169(histone H3-K9 demethylation);GO:0035097(histone methyltransferase complex);GO:0046872(metal ion bindi…	NA	lysine demethylase 4A [Source:NCBI gene;Acc:424571]	21.0292	18.1973	13.8124	9.66481	7.84372	11.3029	1.8409	0.880409	0.0175792
MSTRG.64968	CLK2	ENSGALT00000079832	GO:0004672(protein kinase activity);GO:0004674(protein serine/threonine kinase activity);GO:0004713(protein tyrosine kinase activity);GO:0005524(ATP binding);GO:0005634(nucleus);GO:0005654(nucleoplasm);GO:0006468(protein phosphorylation);GO:0010033(response to organic substance);GO:0010212(response to ionizing radiation);GO:0016604(nuclear body);GO:0018108(peptidyl-tyrosine phosphorylation);GO:00…	NA	CDC like kinase 2 [Source:NCBI gene;Acc:425060]	4.44164	7.36382	8.4357	3.13807	4.35321	3.6407	1.81829	0.862581	0.0441147
MSTRG.22933	UBE2Q2	ENSGALT00000103536;ENSGALT00000097035	GO:0004842(ubiquitin-protein transferase activity);GO:0070936(protein K48-linked ubiquitination);GO:0070936(protein K48-linked ubiquitination)	04120(Ubiquitin mediated proteolysis);04120(Ubiquitin mediated proteolysis)	ubiquitin conjugating enzyme E2 Q2 [Source:NCBI gene;Acc:415356]	8.92369	11.2399	11.1759	6.97069	6.32671	4.16972	1.7942	0.843339	0.0219147
MSTRG.117022	PLA2G4A	ENSGALT00000048470;ENSGALT00000080297;ENSGALT00000059534;ENSGALT00000008121	GO:0004620(phospholipase activity);GO:0004622(lysophospholipase activity);GO:0004623(phospholipase A2 activity);GO:0005509(calcium ion binding);GO:0005544(calcium-dependent phospholipid binding);GO:0005634(nucleus);GO:0005737(cytoplasm);GO:0005783(endoplasmic reticulum);GO:0005794(Golgi apparatus);GO:0005811(lipid droplet);GO:0005829(cytosol);GO:0006629(lipid metabolic process);GO:0009395(phospho…	00564(Glycerophospholipid metabolism);00565(Ether lipid metabolism);00590(Arachidonic acid metabolism);00591(Linoleic acid metabolism);00592(alpha-Linolenic acid metabolism);04010(MAPK signaling pathway);04217(Necroptosis);04270(Vascular smooth muscle contraction);04370(VEGF signaling pathway);04912(GnRH signaling pathway);04912(GnRH signaling pathway)	phospholipase A2 group IVA [Source:NCBI gene;Acc:396394]	13.721	9.47933	9.00768	5.97128	5.06796	7.27118	1.759	0.814756	0.0465202
MSTRG.61897	ENO1	ENSGALT00000049654;ENSGALT00000083588;ENSGALT00000088161;ENSGALT00000089190;ENSGALT00000003745	GO:0000015(phosphopyruvate hydratase complex);GO:0000122(negative regulation of transcription by RNA polymerase II);GO:0000287(magnesium ion binding);GO:0000977(RNA polymerase II regulatory region sequence-specific DNA binding);GO:0001227(DNA-binding transcription repressor activity, RNA polymerase II-specific);GO:0004634(phosphopyruvate hydratase activity);GO:0005737(cytoplasm);GO:0005829(cytoso…	00010(Glycolysis / Gluconeogenesis);03018(RNA degradation);03018(RNA degradation)	enolase 1, (alpha) [Source:NCBI gene;Acc:396017]	1073.52	1421.66	876.169	680.305	533.313	715.154	1.74792	0.805641	0.0244102
MSTRG.35912	ABCC1	ENSGALT00000010749	GO:0000166(nucleotide binding);GO:0004012(phospholipid-translocating ATPase activity);GO:0005524(ATP binding);GO:0005886(plasma membrane);GO:0005887(integral component of plasma membrane);GO:0016020(membrane);GO:0016021(integral component of membrane);GO:0016323(basolateral plasma membrane);GO:0016887(ATPase activity);GO:0022857(transmembrane transporter activity);GO:0042626(ATPase activity, coup…	02010(ABC transporters)	ATP binding cassette subfamily C member 1 [Source:NCBI gene;Acc:395416]	20.1677	15.1608	13.761	8.74492	9.59467	10.132	1.72416	0.785892	0.0262338
MSTRG.13087	SOD1	ENSGALT00000036785;ENSGALT00000087816	GO:0000187(activation of MAPK activity);GO:0000302(response to reactive oxygen species);GO:0000303(response to superoxide);GO:0001541(ovarian follicle development);GO:0001819(positive regulation of cytokine production);GO:0001895(retina homeostasis);GO:0002262(myeloid cell homeostasis);GO:0004784(superoxide dismutase activity);GO:0005507(copper ion binding);GO:0005615(extracellular space);GO:0005…	04146(Peroxisome);04146(Peroxisome)	superoxide dismutase 1, soluble [Source:NCBI gene;Acc:395938]	23.4338	26.0221	26.8473	13.3747	15.9413	15.0105	1.72139	0.783573	0.0368433
MSTRG.75417	CTGF	ENSGALT00000059653;ENSGALT00000080391;ENSGALT00000057250	GO:0001502(cartilage condensation);GO:0001503(ossification);GO:0001525(angiogenesis);GO:0001894(tissue homeostasis);GO:0005178(integrin binding);GO:0005515(protein binding);GO:0005520(insulin-like growth factor binding);GO:0005576(extracellular region);GO:0005615(extracellular space);GO:0007155(cell adhesion);GO:0007160(cell-matrix adhesion);GO:0007229(integrin-mediated signaling pathway);GO:0008…	04371(Apelin signaling pathway);04371(Apelin signaling pathway)	connective tissue growth factor [Source:NCBI gene;Acc:374135]	110.072	117.789	101.438	95.2771	37.3263	59.6339	1.71298	0.776511	0.0404785
MSTRG.63109	EDN2	ENSGALT00000000942	GO:0001516(prostaglandin biosynthetic process);GO:0001659(temperature homeostasis);GO:0002690(positive regulation of leukocyte chemotaxis);GO:0003100(regulation of systemic arterial blood pressure by endothelin);GO:0005179(hormone activity);GO:0005576(extracellular region);GO:0005615(extracellular space);GO:0005623(cell);GO:0007204(positive regulation of cytosolic calcium ion concentration);GO:00…	04080(Neuroactive ligand-receptor interaction);04270(Vascular smooth muscle contraction)	endothelin 2 [Source:NCBI gene;Acc:419559]	75.9146	71.7206	48.4975	33.0235	32.5261	49.394	1.70634	0.770903	0.0440839
MSTRG.81009	RF00003	ENSGALT00000096087	NA	NA		896.073	1508.36	2127.07	1048.37	874.817	732.506	1.70634	0.770902	0.0425327
MSTRG.128610	PAM	ENSGALT00000096186;ENSGALT00000024619	GO:0001519(peptide amidation);GO:0003824(catalytic activity);GO:0004497(monooxygenase activity);GO:0004504(peptidylglycine monooxygenase activity);GO:0004598(peptidylamidoglycolate lyase activity);GO:0005507(copper ion binding);GO:0005515(protein binding);GO:0005576(extracellular region);GO:0005886(plasma membrane);GO:0006518(peptide metabolic process);GO:0008270(zinc ion binding);GO:0016020(memb…	NA	peptidylglycine alpha-amidating monooxygenase [Source:NCBI gene;Acc:427274]	44.4257	39.6976	31.239	19.4949	22.6708	25.5865	1.70271	0.767834	0.0310605
MSTRG.102298	RPS6KA5	ENSGALT00000071253;ENSGALT00000081914	GO:0000166(nucleotide binding);GO:0000287(magnesium ion binding);GO:0004672(protein kinase activity);GO:0004674(protein serine/threonine kinase activity);GO:0005524(ATP binding);GO:0005634(nucleus);GO:0005654(nucleoplasm);GO:0005737(cytoplasm);GO:0006355(regulation of transcription, DNA-templated);GO:0006468(protein phosphorylation);GO:0016301(kinase activity);GO:0016310(phosphorylation);GO:00165…	04010(MAPK signaling pathway);04261(Adrenergic signaling in cardiomyocytes);04261(Adrenergic signaling in cardiomyocytes)	ribosomal protein S6 kinase A5 [Source:NCBI gene;Acc:423408]	6.28385	6.41026	6.39157	2.93712	4.82221	3.51818	1.69237	0.759042	0.0439792
MSTRG.119717	ENSGALG00000050605;ENSGALG00000026728	ENSGALT00000096099;ENSGALT00000044633	NA	NA	AMMECR1 like [Source:NCBI gene;Acc:424755]	13.6321	11.0348	11.8626	7.91496	7.65374	6.10261	1.68561	0.753274	0.0374091
MSTRG.37341	SEPT5;gga-mir-12226	ENSGALT00000064523;ENSGALT00000001634;ENSGALT00000048517;ENSGALT00000105529	GO:0000166(nucleotide binding);GO:0003924(GTPase activity);GO:0005525(GTP binding);GO:0005940(septin ring);GO:0008021(synaptic vesicle);GO:0015630(microtubule cytoskeleton);GO:0017157(regulation of exocytosis);GO:0031105(septin complex);GO:0032947(protein-containing complex scaffold activity);GO:0061640(cytoskeleton-dependent cytokinesis);GO:0061640(cytoskeleton-dependent cytokinesis)	NA	septin 5 [Source:NCBI gene;Acc:416778];gga-mir-12226 [Source:miRBase;Acc:MI0040681]	30.5579	35.6369	25.584	18.3828	15.7736	20.8416	1.66877	0.738781	0.0381769
MSTRG.96834	SWAP70	ENSGALT00000009233	GO:0003677(DNA binding);GO:0005524(ATP binding);GO:0005634(nucleus);GO:0005737(cytoplasm);GO:0007204(positive regulation of cytosolic calcium ion concentration);GO:0008064(regulation of actin polymerization or depolymerization);GO:0016444(somatic cell DNA recombination);GO:0030835(negative regulation of actin filament depolymerization);GO:0032233(positive regulation of actin filament bundle assem…	NA	switching B cell complex subunit SWAP70 [Source:NCBI gene;Acc:423044]	34.0941	40.972	36.5573	20.2014	24.1286	22.5838	1.66817	0.738264	0.0312007
MSTRG.121474	TFR2	ENSGALT00000059660;ENSGALT00000012101	GO:0003725(double-stranded RNA binding);GO:0004998(transferrin receptor activity);GO:0005576(extracellular region);GO:0005768(endosome);GO:0005769(early endosome);GO:0005886(plasma membrane);GO:0005887(integral component of plasma membrane);GO:0005905(clathrin-coated pit);GO:0006826(iron ion transport);GO:0006879(cellular iron ion homeostasis);GO:0006898(receptor-mediated endocytosis);GO:0009897(…	04144(Endocytosis);04145(Phagosome);04216(Ferroptosis);04216(Ferroptosis)	transferrin receptor 2 [Source:NCBI gene;Acc:396191]	23.7071	35.3142	20.8307	13.5424	18.4901	15.8463	1.66779	0.73794	0.0487104
MSTRG.120063	CAB39	ENSGALT00000057892;ENSGALT00000043897	GO:0004674(protein serine/threonine kinase activity);GO:0010800(positive regulation of peptidyl-threonine phosphorylation);GO:0018105(peptidyl-serine phosphorylation);GO:0019900(kinase binding);GO:0023014(signal transduction by protein phosphorylation);GO:0030295(protein kinase activator activity);GO:0032147(activation of protein kinase activity);GO:0035556(intracellular signal transduction);GO:0…	04150(mTOR signaling pathway);04150(mTOR signaling pathway)	calcium binding protein 39 [Source:NCBI gene;Acc:424830]	35.7729	33.5984	26.3022	22.9458	21.9596	12.734	1.65986	0.731065	0.0427717
MSTRG.38582	RF00015	ENSGALT00000028613	NA	NA		862.627	1115.61	1492.34	811.187	713.215	597.405	1.63567	0.709881	0.0499991
MSTRG.80960	UBXN2A	ENSGALT00000068868;ENSGALT00000026614	GO:0000045(autophagosome assembly);GO:0005515(protein binding);GO:0005783(endoplasmic reticulum);GO:0005801(cis-Golgi network);GO:0005829(cytosol);GO:0007030(Golgi organization);GO:0031396(regulation of protein ubiquitination);GO:0031468(nuclear envelope reassembly);GO:0033130(acetylcholine receptor binding);GO:0042176(regulation of protein catabolic process);GO:0043130(ubiquitin binding);GO:0043…	NA	UBX domain protein 2A [Source:NCBI gene;Acc:421973]	44.4579	48.4769	39.6795	27.726	27.7523	26.0281	1.62704	0.702251	0.0431525
MSTRG.73113	EGLN1	ENSGALT00000096803;ENSGALT00000063143	GO:0001666(response to hypoxia);GO:0005506(iron ion binding);GO:0005737(cytoplasm);GO:0005829(cytosol);GO:0006879(cellular iron ion homeostasis);GO:0008198(ferrous iron binding);GO:0014069(postsynaptic density);GO:0016491(oxidoreductase activity);GO:0016705(oxidoreductase activity, acting on paired donors, with incorporation or reduction of molecular oxygen);GO:0016706(2-oxoglutarate-dependent di…	NA	egl-9 family hypoxia inducible factor 1 [Source:NCBI gene;Acc:768374]	82.3591	73.8531	76.48	45.7698	50.8614	49.1685	1.59597	0.674434	0.0469077

## Sheet: DEGs Downregulated
gene_id	gene_name	transcript_id	GO	KEGG	Description	FPKM.DMOG1	FPKM.DMOG2	FPKM.DMOG3	FPKM.Control1	FPKM.Control2	FPKM.Control3	fc	log2(fc)	pval
MSTRG.54879	ENSGALG00000030902	ENSGALT00000056075	GO:0003676(nucleic acid binding);GO:0005634(nucleus);GO:0006974(cellular response to DNA damage stimulus);GO:0008134(transcription factor binding);GO:0051219(phosphoprotein binding);GO:0060317(cardiac epithelial to mesenchymal transition)	04520(Adherens junction)	snail family transcriptional repressor 2 [Source:NCBI gene;Acc:432368]	0.0001	0.0001	0.0001	4.02096	2.45326	2.67044	3.2806e-05	-14.8957	0.000175008
MSTRG.114003	GYPC	ENSGALT00000038068	GO:0005515(protein binding);GO:0016020(membrane);GO:0016021(integral component of membrane);GO:0019897(extrinsic component of plasma membrane);GO:0030863(cortical cytoskeleton)	NA	glycophorin C (Gerbich blood group) [Source:NCBI gene;Acc:424230]	0.0001	0.0001	0.0001	1.48203	2.0624	3.07527	4.53192e-05	-14.4295	0.00125706
MSTRG.59282	PYCR3	ENSGALT00000075872	GO:0004735(pyrroline-5-carboxylate reductase activity);GO:0006561(proline biosynthetic process);GO:0042802(identical protein binding);GO:0055114(oxidation-reduction process)	00330(Arginine and proline metabolism)	pyrroline-5-carboxylate reductase-like [Source:NCBI gene;Acc:420293]	0.0001	0.0001	0.0001	0.0001	1.90095	4.63471	4.59014e-05	-14.4111	0.0112123
MSTRG.95537	IFITM3	ENSGALT00000043563	GO:0005886(plasma membrane);GO:0016020(membrane);GO:0016021(integral component of membrane);GO:0030282(bone mineralization);GO:0060349(bone morphogenesis)	NA	interferon-induced transmembrane protein 3 [Source:NCBI gene;Acc:770612]	0.0001	0.0001	0.0001	1.71879	1.08418	3.72585	4.59501e-05	-14.4096	0.00387904
MSTRG.93481	BST1	ENSGALT00000043970	GO:0001931(uropod);GO:0001952(regulation of cell-matrix adhesion);GO:0003953(NAD+ nucleosidase activity);GO:0005886(plasma membrane);GO:0008152(metabolic process);GO:0008284(positive regulation of cell population proliferation);GO:0008305(integrin complex);GO:0016787(hydrolase activity);GO:0016798(hydrolase activity, acting on glycosyl bonds);GO:0016849(phosphorus-oxygen lyase activity);GO:001989…	00760(Nicotinate and nicotinamide metabolism)	bone marrow stromal cell antigen 1 [Source:NCBI gene;Acc:422828]	0.0001	0.0001	0.0001	1.98249	2.34574	1.70474	4.97268e-05	-14.2956	0.000276567
MSTRG.40871	NOTUM	ENSGALT00000004579	GO:0016787(hydrolase activity);GO:0030178(negative regulation of Wnt signaling pathway);GO:0090090(negative regulation of canonical Wnt signaling pathway);GO:1990697(protein depalmitoleylation);GO:1990699(palmitoleyl hydrolase activity)	04310(Wnt signaling pathway)	notum, palmitoleoyl-protein carboxylesterase [Source:NCBI gene;Acc:417385]	0.0001	0.0001	0.0001	0.0001	1.75038	3.97413	5.24052e-05	-14.2199	0.000781751
MSTRG.38294	VPS29L	ENSGALT00000009569	GO:0005768(endosome);GO:0005829(cytosol);GO:0006886(intracellular protein transport);GO:0008565(protein transporter activity);GO:0015031(protein transport);GO:0030904(retromer complex);GO:0042147(retrograde transport, endosome to Golgi)	04144(Endocytosis)	VPS29 retromer complex component-like [Source:NCBI gene;Acc:416931]	0.0001	0.0001	0.0001	0.0001	2.32508	2.01437	6.91315e-05	-13.8203	0.0207613
MSTRG.60170	KCNB1	ENSGALT00000034233	GO:0001508(action potential);GO:0005216(ion channel activity);GO:0005244(voltage-gated ion channel activity);GO:0005249(voltage-gated potassium channel activity);GO:0005251(delayed rectifier potassium channel activity);GO:0005267(potassium channel activity);GO:0005515(protein binding);GO:0005886(plasma membrane);GO:0006811(ion transport);GO:0006813(potassium ion transport);GO:0008076(voltage-gate…	NA	potassium voltage-gated channel subfamily B member 1 [Source:NCBI gene;Acc:428146]	0.0001	0.0001	0.0001	1.61784	1.76984	0.482176	7.75223e-05	-13.655	2.51264e-06
MSTRG.62258	TNFRSF8	ENSGALT00000067560	GO:0005515(protein binding);GO:0016020(membrane);GO:0016021(integral component of membrane);GO:0042535(positive regulation of tumor necrosis factor biosynthetic process);GO:0043065(positive regulation of apoptotic process);GO:0045556(positive regulation of TRAIL biosynthetic process);GO:0051092(positive regulation of NF-kappaB transcription factor activity);GO:0071260(cellular response to mechani…	04060(Cytokine-cytokine receptor interaction)	TNF receptor superfamily member 8 [Source:NCBI gene;Acc:395090]	0.0001	0.0001	0.0001	1.00973	1.79911	1.03135	7.81212e-05	-13.6439	0.000125699
MSTRG.62433	CLDN19	ENSGALT00000101419;ENSGALT00000092744;ENSGALT00000106120;ENSGALT00000039213	GO:0005198(structural molecule activity);GO:0005634(nucleus);GO:0005737(cytoplasm);GO:0005886(plasma membrane);GO:0005923(bicellular tight junction);GO:0016020(membrane);GO:0016021(integral component of membrane);GO:0016323(basolateral plasma membrane);GO:0019227(neuronal action potential propagation);GO:0030054(cell junction);GO:0043296(apical junction complex);GO:0043297(apical junction assembl…	04514(Cell adhesion molecules (CAMs));04530(Tight junction);04530(Tight junction)	claudin 19 [Source:NCBI gene;Acc:769245]	0.0001	0.0001	0.0001	1.82632	0.917204	0.829467	8.39633e-05	-13.5399	0.0280384
MSTRG.92326	ENSGALG00000046914	ENSGALT00000023059;ENSGALT00000098741	GO:0046872(metal ion binding);GO:0046872(metal ion binding)	NA		0.0001	0.0001	0.0001	0.296919	0.782206	2.25437	8.99956e-05	-13.4398	0.00344598
MSTRG.93836	CYTL1	ENSGALT00000024216	GO:0002062(chondrocyte differentiation);GO:0045944(positive regulation of transcription by RNA polymerase II);GO:0048839(inner ear development);GO:0050650(chondroitin sulfate proteoglycan biosynthetic process);GO:0051091(positive regulation of DNA-binding transcription factor activity);GO:1990079(cartilage homeostasis)	NA	cytokine like 1 [Source:NCBI gene;Acc:422849]	0.0001	0.0001	0.0001	1.26327	1.50154	0.299279	9.79085e-05	-13.3182	0.0317016
MSTRG.70699	SERTAD4	ENSGALT00000043743	GO:0005634(nucleus)	NA	SERTA domain containing 4 [Source:HGNC Symbol;Acc:HGNC:25236]	0.0001	0.0001	0.0001	1.12587	1.17505	0.696657	0.000100081	-13.2865	0.00318835
MSTRG.78162	ENSGALG00000015928	ENSGALT00000025673	GO:0000166(nucleotide binding);GO:0003676(nucleic acid binding);GO:0003723(RNA binding);GO:0004386(helicase activity);GO:0005524(ATP binding);GO:0016787(hydrolase activity)	NA	DEAD-box helicase 43 [Source:NCBI gene;Acc:428637]	0.0001	0.0001	0.0001	0.908251	0.571145	1.40263	0.000104093	-13.2298	0.00115139
MSTRG.104508	PHYHIPL	ENSGALT00000073077	GO:0005515(protein binding);GO:0005737(cytoplasm)	NA	phytanoyl-CoA 2-hydroxylase interacting protein like [Source:NCBI gene;Acc:423603]	0.0001	0.0001	0.0001	1.07622	1.03228	0.713203	0.000106319	-13.1993	7.81326e-06
MSTRG.118464	ENSGALG00000049851	ENSGALT00000097395	GO:0043123(positive regulation of I-kappaB kinase/NF-kappaB signaling)	NA		0.0001	0.0001	0.0001	0.740823	0.433544	1.46499	0.000113664	-13.1029	0.00925293
MSTRG.62568	PRNP	ENSGALT00000000277	GO:0001540(amyloid-beta binding);GO:0001933(negative regulation of protein phosphorylation);GO:0002020(protease binding);GO:0005507(copper ion binding);GO:0005515(protein binding);GO:0005521(lamin binding);GO:0005539(glycosaminoglycan binding);GO:0005604(basement membrane);GO:0005623(cell);GO:0005737(cytoplasm);GO:0005783(endoplasmic reticulum);GO:0005794(Golgi apparatus);GO:0005829(cytosol);GO:0…	04216(Ferroptosis)	prion protein [Source:NCBI gene;Acc:396452]	0.0001	0.0001	0.0001	1.01311	0.974972	0.452341	0.000122929	-12.9899	0.00208635
MSTRG.102674	BDKRB1	ENSGALT00000032517	GO:0004930(G protein-coupled receptor activity);GO:0004947(bradykinin receptor activity);GO:0005886(plasma membrane);GO:0006954(inflammatory response);GO:0007186(G protein-coupled receptor signaling pathway);GO:0007205(protein kinase C-activating G protein-coupled receptor signaling pathway);GO:0009612(response to mechanical stimulus);GO:0016020(membrane);GO:0016021(integral component of membrane…	04020(Calcium signaling pathway);04080(Neuroactive ligand-receptor interaction);04810(Regulation of actin cytoskeleton)	bradykinin receptor B1 [Source:NCBI gene;Acc:772372]	0.0001	0.0001	0.0001	1.61703	0.479552	0.284437	0.000125996	-12.9543	0.0119664
MSTRG.50722	SERPINB10	ENSGALT00000020982	GO:0004867(serine-type endopeptidase inhibitor activity);GO:0005615(extracellular space);GO:0010951(negative regulation of endopeptidase activity)	NA	serpin family B member 2 [Source:NCBI gene;Acc:420896]	0.0001	0.0001	0.0001	1.16585	0.502625	0.707064	0.000126287	-12.951	0.00433599
MSTRG.33581	GFPT2	ENSGALT00000049899	GO:0004360(glutamine-fructose-6-phosphate transaminase (isomerizing) activity);GO:0006002(fructose 6-phosphate metabolic process);GO:0006047(UDP-N-acetylglucosamine metabolic process);GO:0006487(protein N-linked glycosylation);GO:0097367(carbohydrate derivative binding);GO:1901135(carbohydrate derivative metabolic process);GO:1901137(carbohydrate derivative biosynthetic process);GO:1990830(cellul…	00250(Alanine, aspartate and glutamate metabolism);00520(Amino sugar and nucleotide sugar metabolism)	glutamine-fructose-6-phosphate transaminase 2 [Source:NCBI gene;Acc:426962]	0.0001	0.0001	0.0001	0.783561	0.945284	0.631874	0.00012708	-12.942	0.00020183
MSTRG.96564	PTH	ENSGALT00000061928	GO:0000122(negative regulation of transcription by RNA polymerase II);GO:0000981(DNA-binding transcription factor activity, RNA polymerase II-specific);GO:0005179(hormone activity);GO:0005576(extracellular region);GO:0005615(extracellular space);GO:0005623(cell);GO:0006874(cellular calcium ion homeostasis);GO:0007189(adenylate cyclase-activating G protein-coupled receptor signaling pathway);GO:00…	04080(Neuroactive ligand-receptor interaction)	parathyroid hormone [Source:NCBI gene;Acc:396436]	0.0001	0.0001	0.0001	0.0001	1.36265	0.95211	0.000129598	-12.9137	0.0155749
MSTRG.28914	ENSGALG00000038624	ENSGALT00000052898	GO:0004930(G protein-coupled receptor activity);GO:0007165(signal transduction);GO:0007186(G protein-coupled receptor signaling pathway);GO:0016020(membrane);GO:0016021(integral component of membrane)	NA	G protein-coupled receptor 62 [Source:NCBI gene;Acc:100859224]	0.0001	0.0001	0.0001	0.948719	0.489536	0.782762	0.000135073	-12.854	0.00663894
MSTRG.4135	PTPRR	ENSGALT00000079691	GO:0004721(phosphoprotein phosphatase activity);GO:0004725(protein tyrosine phosphatase activity);GO:0005829(cytosol);GO:0005886(plasma membrane);GO:0006470(protein dephosphorylation);GO:0010633(negative regulation of epithelial cell migration);GO:0016311(dephosphorylation);GO:0016787(hydrolase activity);GO:0016791(phosphatase activity);GO:0019901(protein kinase binding);GO:0030054(cell junction)…	04010(MAPK signaling pathway)	protein tyrosine phosphatase, receptor type R [Source:NCBI gene;Acc:771985]	0.0001	0.0001	0.0001	0.596174	0.378194	1.22622	0.000136327	-12.8406	0.000120861
MSTRG.64957	ENSGALG00000031002	ENSGALT00000096961;ENSGALT00000047400	GO:0004348(glucosylceramidase activity);GO:0006629(lipid metabolic process);GO:0006665(sphingolipid metabolic process);GO:0008152(metabolic process);GO:0016787(hydrolase activity);GO:0016798(hydrolase activity, acting on glycosyl bonds);GO:0016798(hydrolase activity, acting on glycosyl bonds)	00511(Other glycan degradation);00600(Sphingolipid metabolism);04142(Lysosome);04142(Lysosome)	glucosylceramidase-like [Source:NCBI gene;Acc:107050229]	0.0001	0.0001	0.0001	0.642995	0.188501	0.856961	0.000177677	-12.4585	0.00690897
MSTRG.67650	ENSGALG00000053659	ENSGALT00000054581	GO:0003676(nucleic acid binding)	NA	GDNF inducible zinc finger protein 1 [Source:NCBI gene;Acc:421233]	0.0001	0.0001	0.0001	0.67085	0.230014	0.69348	0.000188165	-12.3757	0.0230843
MSTRG.36127	ENSGALG00000049356	ENSGALT00000106640	NA	NA		0.0001	0.0001	0.0001	0.167242	0.449094	0.971764	0.000188905	-12.3701	0.0231183
MSTRG.108669	CRTAC1	ENSGALT00000074029;ENSGALT00000028063	GO:0005509(calcium ion binding);GO:0007413(axonal fasciculation);GO:0021772(olfactory bulb development);GO:0030426(growth cone);GO:1900121(negative regulation of receptor binding);GO:1900121(negative regulation of receptor binding)	NA	cartilage acidic protein 1 [Source:NCBI gene;Acc:425346]	0.0001	0.0001	0.0001	0.539951	0.206866	0.783274	0.000196067	-12.3164	0.0175848
MSTRG.125932	DMRT2	ENSGALT00000043613	GO:0000977(RNA polymerase II regulatory region sequence-specific DNA binding);GO:0003677(DNA binding);GO:0003700(DNA-binding transcription factor activity);GO:0005634(nucleus);GO:0006355(regulation of transcription, DNA-templated);GO:0014807(regulation of somitogenesis);GO:0042803(protein homodimerization activity);GO:0043565(sequence-specific DNA binding);GO:0045944(positive regulation of transc…	NA	doublesex and mab-3 related transcription factor 2 [Source:NCBI gene;Acc:100858556]	0.0001	0.0001	0.0001	0.488502	0.549502	0.362337	0.000214234	-12.1885	0.0440087
MSTRG.40517	ENSGALG00000001111	ENSGALT00000001676	GO:0003777(microtubule motor activity);GO:0005524(ATP binding);GO:0005930(axoneme);GO:0007018(microtubule-based movement);GO:0008569(ATP-dependent microtubule motor activity, minus-end-directed);GO:0030286(dynein complex);GO:0045503(dynein light chain binding);GO:0045505(dynein intermediate chain binding);GO:0051959(dynein light intermediate chain binding)	NA		0.0001	0.0001	0.0001	1.02424	0.056108	0.313106	0.000215292	-12.1814	0.00912507
MSTRG.62834	ENSGALG00000052980	ENSGALT00000106573;ENSGALT00000095323	GO:0008146(sulfotransferase activity);GO:0008146(sulfotransferase activity)	NA	sulfotransferase family cytosolic 2B member 1-like [Source:NCBI gene;Acc:112530164]	0.0001	0.0001	0.0001	0.424892	0.314841	0.472354	0.000247507	-11.9802	0.036784
MSTRG.55200	ENSGALG00000015404	ENSGALT00000036752	GO:0000166(nucleotide binding);GO:0003774(motor activity);GO:0003777(microtubule motor activity);GO:0005524(ATP binding);GO:0005634(nucleus);GO:0005871(kinesin complex);GO:0005874(microtubule);GO:0007018(microtubule-based movement);GO:0008017(microtubule binding);GO:0016887(ATPase activity)	NA	kinesin family member 20A-like [Source:NCBI gene;Acc:430761]	0.0001	0.0001	0.0001	0.356617	0.238908	0.52948	0.000266665	-11.8727	0.0326612
MSTRG.110177	ENSGALG00000052052	ENSGALT00000099280;ENSGALT00000102665;ENSGALT00000096349	NA	NA	chromosome 6 open reading frame, human C10orf90 [Source:NCBI gene;Acc:423959]	0.0001	0.0001	0.0001	0.670225	0.151616	0.159687	0.000305646	-11.6759	0.000241599
MSTRG.66711	ENSGALG00000027742	ENSGALT00000043489	GO:0005515(protein binding)	NA	kelch like family member 33 [Source:NCBI gene;Acc:101750992]	0.0001	0.0001	0.0001	0.562165	0.244349	0.167072	0.000308139	-11.6641	0.0358735
MSTRG.94215	SH3BP2	ENSGALT00000025262;ENSGALT00000090591	GO:0001784(phosphotyrosine residue binding);GO:0005070(SH3/SH2 adaptor activity);GO:0007165(signal transduction);GO:0009967(positive regulation of signal transduction);GO:0017124(SH3 domain binding);GO:0017124(SH3 domain binding)	NA	SH3 domain binding protein 2 [Source:NCBI gene;Acc:422883]	0.0001	0.0001	0.0001	0.0551559	0.385393	0.45797	0.000333883	-11.5484	0.0216435
MSTRG.124523	SLC1A3	ENSGALT00000107958;ENSGALT00000100353;ENSGALT00000005668	GO:0005313(L-glutamate transmembrane transporter activity);GO:0005314(high-affinity glutamate transmembrane transporter activity);GO:0005886(plasma membrane);GO:0005887(integral component of plasma membrane);GO:0006536(glutamate metabolic process);GO:0006537(glutamate biosynthetic process);GO:0007605(sensory perception of sound);GO:0009416(response to light stimulus);GO:0009449(gamma-aminobutyric…	NA	solute carrier family 1 member 3 [Source:NCBI gene;Acc:395443]	0.0001	0.0001	0.0001	0.274304	0.286423	0.181869	0.000403988	-11.2734	0.0290729
MSTRG.45351	CACNB2	ENSGALT00000013988;ENSGALT00000094252;ENSGALT00000052701;ENSGALT00000098574	GO:0005245(voltage-gated calcium channel activity);GO:0005515(protein binding);GO:0005891(voltage-gated calcium channel complex);GO:0007268(chemical synaptic transmission);GO:0007528(neuromuscular junction development);GO:0007601(visual perception);GO:0008331(high voltage-gated calcium channel activity);GO:0051015(actin filament binding);GO:0051928(positive regulation of calcium ion transport);GO…	04010(MAPK signaling pathway);04260(Cardiac muscle contraction);04261(Adrenergic signaling in cardiomyocytes);04261(Adrenergic signaling in cardiomyocytes)	calcium voltage-gated channel auxiliary subunit beta 2 [Source:NCBI gene;Acc:428420]	0.0130552	0.0001	0.0001	0.0001	0.656999	0.680705	0.0099082	-6.65716	0.0468622
MSTRG.46672	STK31	ENSGALT00000103039;ENSGALT00000093300;ENSGALT00000017888;ENSGALT00000101027;ENSGALT00000103313	GO:0001669(acrosomal vesicle);GO:0003723(RNA binding);GO:0004518(nuclease activity);GO:0004672(protein kinase activity);GO:0005524(ATP binding);GO:0005634(nucleus);GO:0005737(cytoplasm);GO:0006401(RNA catabolic process);GO:0006468(protein phosphorylation);GO:0090305(nucleic acid phosphodiester bond hydrolysis);GO:0090305(nucleic acid phosphodiester bond hydrolysis)	NA	serine/threonine kinase 31 [Source:NCBI gene;Acc:420621]	0.0123818	0.0001	0.0001	0.4436	0.24724	0.353139	0.0120517	-6.37461	0.02963
MSTRG.62254	TNFRSF1B	ENSGALT00000061967	GO:0005031(tumor necrosis factor-activated receptor activity);GO:0005515(protein binding);GO:0006954(inflammatory response);GO:0016020(membrane);GO:0016021(integral component of membrane);GO:0033209(tumor necrosis factor-mediated signaling pathway)	04060(Cytokine-cytokine receptor interaction);04920(Adipocytokine signaling pathway)	TNF receptor superfamily member 1B [Source:NCBI gene;Acc:395083]	0.070614	0.0001	0.0001	1.36797	0.476667	0.537892	0.0297222	-5.07232	0.0277138
MSTRG.75781	HEY2	ENSGALT00000080666	GO:0000122(negative regulation of transcription by RNA polymerase II);GO:0000977(RNA polymerase II regulatory region sequence-specific DNA binding);GO:0000981(DNA-binding transcription factor activity, RNA polymerase II-specific);GO:0001102(RNA polymerase II activating transcription factor binding);GO:0001227(DNA-binding transcription repressor activity, RNA polymerase II-specific);GO:0001568(blo…	NA	hes related family bHLH transcription factor with YRPW motif 2 [Source:NCBI gene;Acc:421718]	0.171161	0.0001	0.090863	3.16452	1.83064	2.36201	0.0356284	-4.81083	0.0114212
MSTRG.58157	TNFRSF11B	ENSGALT00000081930;ENSGALT00000107810	GO:0005515(protein binding);GO:0005615(extracellular space);GO:0006915(apoptotic process);GO:0007165(signal transduction);GO:0030198(extracellular matrix organization);GO:0031012(extracellular matrix);GO:0042489(negative regulation of odontogenesis of dentin-containing tooth);GO:0042489(negative regulation of odontogenesis of dentin-containing tooth)	04060(Cytokine-cytokine receptor interaction);04060(Cytokine-cytokine receptor interaction)	TNF receptor superfamily member 11b [Source:NCBI gene;Acc:378803]	0.269905	0.0001	0.0810782	1.86839	2.0693	2.81464	0.0519944	-4.2655	0.000548192
MSTRG.11102	ENSGALG00000047821	ENSGALT00000095806	NA	NA		0.248413	0.008325	0.0001	0.651934	2.5083	1.25008	0.0582358	-4.10195	0.0492197
MSTRG.59078	PTP4A3	ENSGALT00000069402;ENSGALT00000102586	GO:0004725(protein tyrosine phosphatase activity);GO:0005634(nucleus);GO:0005737(cytoplasm);GO:0006355(regulation of transcription, DNA-templated);GO:0006470(protein dephosphorylation);GO:0007219(Notch signaling pathway);GO:0008138(protein tyrosine/serine/threonine phosphatase activity);GO:0016311(dephosphorylation);GO:0016791(phosphatase activity);GO:0035335(peptidyl-tyrosine dephosphorylation);…	NA	protein tyrosine phosphatase type IVA, member 3 [Source:NCBI gene;Acc:768713]	1.33224	0.787316	0.0001	1.5791	13.4747	20.9638	0.0588507	-4.0868	0.00146451
MSTRG.42745	ENSGALG00000051564	ENSGALT00000091681	GO:0005515(protein binding)	NA		0.477074	0.0001	0.0001	1.96081	2.10739	3.82268	0.0604842	-4.0473	0.0280143
MSTRG.46670	NPY	ENSGALT00000017891	GO:0001664(G protein-coupled receptor binding);GO:0005179(hormone activity);GO:0005184(neuropeptide hormone activity);GO:0005576(extracellular region);GO:0005615(extracellular space);GO:0005737(cytoplasm);GO:0005794(Golgi apparatus);GO:0007218(neuropeptide signaling pathway);GO:0008217(regulation of blood pressure);GO:0010469(regulation of signaling receptor activity);GO:0021954(central nervous s…	04080(Neuroactive ligand-receptor interaction);04920(Adipocytokine signaling pathway)	neuropeptide Y [Source:NCBI gene;Acc:396464]	1.85151	0.0001	0.0001	8.43842	8.13866	9.5669	0.0708272	-3.81955	0.0164998
MSTRG.47127	ENSGALG00000011283	ENSGALT00000102005;ENSGALT00000055167;ENSGALT00000091678;ENSGALT00000103844;ENSGALT00000018407;ENSGALT00000092346	GO:0003676(nucleic acid binding);GO:0003730(mRNA 3'-UTR binding);GO:0008270(zinc ion binding);GO:0010609(mRNA localization resulting in posttranscriptional regulation of gene expression);GO:0043025(neuronal cell body);GO:0046872(metal ion binding);GO:2000765(regulation of cytoplasmic translation);GO:2000765(regulation of cytoplasmic translation)	NA	zinc finger protein 385D [Source:NCBI gene;Acc:420651]	0.0523389	0.168756	0.0001	0.921926	0.538835	0.897322	0.0938028	-3.41423	0.0437965
MSTRG.108159	ENSGALG00000023824	ENSGALT00000010186	GO:0016042(lipid catabolic process);GO:0016298(lipase activity);GO:0016787(hydrolase activity);GO:0016788(hydrolase activity, acting on ester bonds);GO:0044255(cellular lipid metabolic process)	00100(Steroid biosynthesis);04142(Lysosome)	lipase member M-like 5 [Source:NCBI gene;Acc:428958]	0.809793	0.150815	0.0001	3.61894	2.93901	3.18699	0.0985852	-3.34248	0.00510846
MSTRG.531	GATA3	ENSGALT00000099385;ENSGALT00000049267	GO:0000122(negative regulation of transcription by RNA polymerase II);GO:0000790(nuclear chromatin);GO:0000902(cell morphogenesis);GO:0000976(transcription regulatory region sequence-specific DNA binding);GO:0000977(RNA polymerase II regulatory region sequence-specific DNA binding);GO:0000978(RNA polymerase II proximal promoter sequence-specific DNA binding);GO:0000981(DNA-binding transcription f…	NA	GATA binding protein 3 [Source:NCBI gene;Acc:419106]	0.600942	0.122135	0.194955	2.51178	1.56879	1.84307	0.154977	-2.68987	0.00494234
MSTRG.25180	ALDH1A3	ENSGALT00000078438;ENSGALT00000099696	GO:0001758(retinal dehydrogenase activity);GO:0002072(optic cup morphogenesis involved in camera-type eye development);GO:0002138(retinoic acid biosynthetic process);GO:0004029(aldehyde dehydrogenase (NAD) activity);GO:0004030(aldehyde dehydrogenase [NAD(P)+] activity);GO:0005634(nucleus);GO:0005737(cytoplasm);GO:0005829(cytosol);GO:0005886(plasma membrane);GO:0006081(cellular aldehyde metabolic …	00010(Glycolysis / Gluconeogenesis);00340(Histidine metabolism);00350(Tyrosine metabolism);00360(Phenylalanine metabolism);00410(beta-Alanine metabolism);00980(Metabolism of xenobiotics by cytochrome P450);00982(Drug metabolism - cytochrome P450);00982(Drug metabolism - cytochrome P450)	aldehyde dehydrogenase 1 family member A3 [Source:NCBI gene;Acc:395389]	0.245713	0.0480125	0.126689	1.49966	0.590018	0.43098	0.166787	-2.58392	0.0302869
MSTRG.41757	ARMC7	ENSGALT00000012930	GO:0005515(protein binding)	NA	armadillo repeat containing 7 [Source:NCBI gene;Acc:422118]	0.966403	0.265048	0.431855	2.24852	4.14245	2.62137	0.184559	-2.43785	0.0121499
MSTRG.124396	ENSGALG00000028267	ENSGALT00000045279	GO:0000139(Golgi membrane);GO:0005802(trans-Golgi network);GO:0005829(cytosol);GO:0006890(retrograde vesicle-mediated transport, Golgi to endoplasmic reticulum);GO:0007030(Golgi organization);GO:0031985(Golgi cisterna);GO:0043001(Golgi to plasma membrane protein transport);GO:0048194(Golgi vesicle budding);GO:0070273(phosphatidylinositol-4-phosphate binding)	NA	golgi phosphoprotein 3 [Source:NCBI gene;Acc:427422]	6.89971	4.12361	4.45376	18.0761	26.9166	31.8979	0.201287	-2.31267	6.34302e-08
MSTRG.98472	LDLRAD3	ENSGALT00000098828;ENSGALT00000049276	GO:0001540(amyloid-beta binding);GO:0005515(protein binding);GO:0005886(plasma membrane);GO:0006898(receptor-mediated endocytosis);GO:0016020(membrane);GO:0016021(integral component of membrane);GO:0070613(regulation of protein processing);GO:0070613(regulation of protein processing)	NA	low density lipoprotein receptor class A domain containing 3 [Source:NCBI gene;Acc:423160]	2.32872	3.28761	1.82589	10.9756	16.7168	9.15223	0.201989	-2.30765	5.43017e-08
MSTRG.81672	ADGRF2	ENSGALT00000096569;ENSGALT00000097924;ENSGALT00000026987;ENSGALT00000100685	GO:0004888(transmembrane signaling receptor activity);GO:0004930(G protein-coupled receptor activity);GO:0007166(cell surface receptor signaling pathway);GO:0007186(G protein-coupled receptor signaling pathway);GO:0016020(membrane);GO:0016021(integral component of membrane);GO:0016021(integral component of membrane)	NA	adhesion G protein-coupled receptor F4 [Source:NCBI gene;Acc:107053171]	0.137019	0.206029	0.172344	1.18776	0.70325	0.642382	0.203439	-2.29733	0.0452299
MSTRG.129413	VCAN	ENSGALT00000025190;ENSGALT00000108083	GO:0001501(skeletal system development);GO:0005509(calcium ion binding);GO:0005540(hyaluronic acid binding);GO:0007155(cell adhesion);GO:0007417(central nervous system development);GO:0031012(extracellular matrix);GO:0031012(extracellular matrix)	04514(Cell adhesion molecules (CAMs));04514(Cell adhesion molecules (CAMs))	versican [Source:NCBI gene;Acc:395565]	0.0796448	0.178631	0.0213779	0.281562	0.546348	0.528035	0.206243	-2.27758	0.0135858
MSTRG.39439	SLC31A1	ENSGALT00000014372;ENSGALT00000074273;ENSGALT00000101330;ENSGALT00000085420;ENSGALT00000066194;ENSGALT00000047864;ENSGALT00000071700	GO:0005375(copper ion transmembrane transporter activity);GO:0005770(late endosome);GO:0005886(plasma membrane);GO:0006878(cellular copper ion homeostasis);GO:0015677(copper ion import);GO:0016020(membrane);GO:0016021(integral component of membrane);GO:0035434(copper ion transmembrane transport);GO:0042802(identical protein binding);GO:0055037(recycling endosome);GO:0055037(recycling endosome)	NA	solute carrier family 31 member 1 [Source:NCBI gene;Acc:417268]	1.96178	0.80899	1.25779	2.39182	7.76499	9.16048	0.208547	-2.26155	9.95105e-05
MSTRG.76697	LIN28B	ENSGALT00000044077;ENSGALT00000053905	GO:0003676(nucleic acid binding);GO:0003723(RNA binding);GO:0005634(nucleus);GO:0005730(nucleolus);GO:0005829(cytosol);GO:0008270(zinc ion binding);GO:0010587(miRNA catabolic process);GO:0031047(gene silencing by RNA);GO:0031054(pre-miRNA processing);GO:0031123(RNA 3'-end processing);GO:0046872(metal ion binding);GO:0046872(metal ion binding)	NA	lin-28 homolog B [Source:NCBI gene;Acc:421786]	1.27933	0.175527	0.304778	3.09361	2.96566	2.35394	0.209151	-2.25738	0.0409497
MSTRG.130393	gga-mir-31	ENSGALT00000029046	NA	NA	gga-mir-31 [Source:miRBase;Acc:MI0001276]	1.46692	2.58268	2.3913	10.8275	9.11081	10.5129	0.211515	-2.24117	7.82263e-08
MSTRG.39824	TOR1B;TOR1BL	ENSGALT00000087149;ENSGALT00000006704	GO:0005524(ATP binding);GO:0005635(nuclear envelope);GO:0005737(cytoplasm);GO:0005783(endoplasmic reticulum);GO:0005788(endoplasmic reticulum lumen);GO:0007029(endoplasmic reticulum organization);GO:0016887(ATPase activity);GO:0051260(protein homooligomerization);GO:0071763(nuclear membrane organization);GO:0000166(nucleotide binding);GO:0051085(chaperone cofactor-dependent protein refolding)	NA	torsin family 1 member B [Source:HGNC Symbol;Acc:HGNC:11995];torsin family 1, member B-like [Source:NCBI gene;Acc:417192]	1.91997	1.03182	1.17695	6.8827	5.25849	7.33581	0.21198	-2.238	3.02398e-06
MSTRG.78988	ENSGALG00000048639	ENSGALT00000101499	NA	NA		11.4881	1.03146	1.87511	28.8253	19.3986	19.6626	0.21204	-2.23759	0.0171393
MSTRG.98481	TRAF6	ENSGALT00000012888;ENSGALT00000102251;ENSGALT00000105433	GO:0000122(negative regulation of transcription by RNA polymerase II);GO:0000209(protein polyubiquitination);GO:0001503(ossification);GO:0001843(neural tube closure);GO:0002224(toll-like receptor signaling pathway);GO:0002726(positive regulation of T cell cytokine production);GO:0002755(MyD88-dependent toll-like receptor signaling pathway);GO:0004842(ubiquitin-protein transferase activity);GO:000…	04010(MAPK signaling pathway);04120(Ubiquitin mediated proteolysis);04140(Autophagy - animal);04144(Endocytosis);04620(Toll-like receptor signaling pathway);04621(NOD-like receptor signaling pathway);04622(RIG-I-like receptor signaling pathway);05168(Herpes simplex virus 1 infection);05168(Herpes simplex virus 1 infection)	TNF receptor associated factor 6 [Source:NCBI gene;Acc:423163]	3.20303	2.45051	2.48179	2.9777	20.6694	13.7423	0.217584	-2.20036	0.000192944
MSTRG.108152	CXCL12	ENSGALT00000066398;ENSGALT00000061096	GO:0005576(extracellular region);GO:0006935(chemotaxis);GO:0006952(defense response);GO:0006955(immune response);GO:0007154(cell communication);GO:0008009(chemokine activity);GO:0009897(external side of plasma membrane);GO:0014812(muscle cell migration);GO:0030335(positive regulation of cell migration);GO:0045236(CXCR chemokine receptor binding);GO:0050930(induction of positive chemotaxis);GO:006…	04060(Cytokine-cytokine receptor interaction);04672(Intestinal immune network for IgA production);04810(Regulation of actin cytoskeleton);04810(Regulation of actin cytoskeleton)	C-X-C motif chemokine ligand 12 [Source:NCBI gene;Acc:395180]	0.499832	0.0322015	0.87423	2.3223	2.15739	1.86438	0.221666	-2.17354	0.0455178
MSTRG.35546	EPN2;gga-mir-1551	ENSGALT00000050442;ENSGALT00000095408;ENSGALT00000042479;ENSGALT00000101465;ENSGALT00000093527;ENSGALT00000095347;ENSGALT00000107492	GO:0006897(endocytosis);GO:0030128(clathrin coat of endocytic vesicle);GO:0030948(negative regulation of vascular endothelial growth factor receptor signaling pathway);GO:0043231(intracellular membrane-bounded organelle);GO:0045747(positive regulation of Notch signaling pathway);GO:1903671(negative regulation of sprouting angiogenesis);GO:1903671(negative regulation of sprouting angiogenesis)	04144(Endocytosis);04144(Endocytosis)	epsin 2 [Source:NCBI gene;Acc:416524];gga-mir-1551 [Source:miRBase;Acc:MI0007276]	1.5162	2.29524	1.16599	9.30806	3.72374	8.77405	0.228261	-2.13124	5.0328e-06
MSTRG.43413	ENSGALG00000026578	ENSGALT00000044329	GO:0005634(nucleus);GO:0005737(cytoplasm);GO:0007141(male meiosis I);GO:0007144(female meiosis I);GO:0048255(mRNA stabilization);GO:0051321(meiotic cell cycle)	NA	uncharacterized LOC769510 [Source:NCBI gene;Acc:769510]	1.03548	0.17343	0.206558	1.75422	2.24503	2.16378	0.229671	-2.12236	0.020695
MSTRG.65815	ZNF76	ENSGALT00000004145	GO:0001228(DNA-binding transcription activator activity, RNA polymerase II-specific);GO:0003676(nucleic acid binding);GO:0043565(sequence-specific DNA binding);GO:0045944(positive regulation of transcription by RNA polymerase II)	NA	zinc finger protein 76 [Source:NCBI gene;Acc:772107]	1.20081	1.02925	0.367968	5.34953	2.80835	2.89752	0.235	-2.08927	0.00195142
MSTRG.32447	SLC26A2	ENSGALT00000091199;ENSGALT00000001881	GO:0001503(ossification);GO:0005887(integral component of plasma membrane);GO:0006811(ion transport);GO:0008271(secondary active sulfate transmembrane transporter activity);GO:0008272(sulfate transport);GO:0015106(bicarbonate transmembrane transporter activity);GO:0015108(chloride transmembrane transporter activity);GO:0015116(sulfate transmembrane transporter activity);GO:0015301(anion:anion ant…	NA	E3 ubiquitin/ISG15 ligase TRIM25-like [Source:NCBI gene;Acc:416147]	0.26359	0.334205	0.24359	1.31628	0.908454	1.31099	0.237967	-2.07117	0.0247149
MSTRG.58577	ENSGALG00000041233	ENSGALT00000046927	NA	NA		14.3533	2.40716	1.13532	22.4003	21.919	29.8035	0.241434	-2.0503	0.0045486
MSTRG.99998	TMEM229B	ENSGALT00000015455;ENSGALT00000097322	GO:0009617(response to bacterium);GO:0016020(membrane);GO:0016021(integral component of membrane);GO:0016021(integral component of membrane)	NA	transmembrane protein 229B [Source:NCBI gene;Acc:423269]	0.0850678	0.753566	0.176885	0.728857	0.427682	3.04817	0.241519	-2.04979	0.0341385
MSTRG.21211	CWF19L2	ENSGALT00000027735	NA	NA	CWF19 like cell cycle control factor 2 [Source:NCBI gene;Acc:418973]	1.55177	1.00114	0.444001	4.27478	3.43874	4.27274	0.250029	-1.99983	0.00177661
MSTRG.64864	MRPL24	ENSGALT00000067413	GO:0003735(structural constituent of ribosome);GO:0005622(intracellular);GO:0005739(mitochondrion);GO:0005762(mitochondrial large ribosomal subunit);GO:0005840(ribosome);GO:0006412(translation)	03010(Ribosome)	mitochondrial ribosomal protein L24 [Source:NCBI gene;Acc:768957]	5.48037	0.466177	4.64498	18.7795	7.59088	15.893	0.250608	-1.9965	0.0115273
MSTRG.29326	ENSGALG00000005024	ENSGALT00000036273	GO:0005509(calcium ion binding)	NA	EF-hand and coiled-coil domain containing 1 [Source:NCBI gene;Acc:415972]	0.515281	0.33493	0.761933	3.08385	2.37654	0.964448	0.250924	-1.99468	0.0418971
MSTRG.64985	SYT11	ENSGALT00000023607;ENSGALT00000086474	GO:0000149(SNARE binding);GO:0001778(plasma membrane repair);GO:0001786(phosphatidylserine binding);GO:0001891(phagocytic cup);GO:0005737(cytoplasm);GO:0005764(lysosome);GO:0005886(plasma membrane);GO:0005887(integral component of plasma membrane);GO:0009611(response to wounding);GO:0014059(regulation of dopamine secretion);GO:0016020(membrane);GO:0016021(integral component of membrane);GO:001619…	NA	synaptotagmin 11 [Source:NCBI gene;Acc:429166]	8.6851	10.3067	0.319224	25.1924	22.7174	28.7504	0.251904	-1.98906	0.0109128
MSTRG.108765	LZTS2	ENSGALT00000107652;ENSGALT00000100521;ENSGALT00000039298	GO:0001822(kidney development);GO:0005737(cytoplasm);GO:0005829(cytosol);GO:0005886(plasma membrane);GO:0008285(negative regulation of cell population proliferation);GO:0016055(Wnt signaling pathway);GO:0030178(negative regulation of Wnt signaling pathway);GO:0031982(vesicle);GO:0051301(cell division);GO:0060682(primary ureteric bud growth);GO:0072197(ureter morphogenesis);GO:0090090(negative reg…	NA	leucine zipper tumor suppressor 2 [Source:NCBI gene;Acc:428973]	1.01114	0.361701	0.15402	2.26257	1.21069	2.44626	0.257936	-1.95491	0.0395031
MSTRG.40431	ENSGALG00000050425	ENSGALT00000041141	GO:0003676(nucleic acid binding)	NA		1.29643	0.915738	0.808556	1.23096	3.38227	6.69654	0.26709	-1.9046	0.00229768
MSTRG.66147	ENSGALG00000050616	ENSGALT00000091872	GO:0003841(1-acylglycerol-3-phosphate O-acyltransferase activity);GO:0008654(phospholipid biosynthetic process);GO:0016020(membrane);GO:0016746(transferase activity, transferring acyl groups)	00561(Glycerolipid metabolism);00564(Glycerophospholipid metabolism)	proline rich 29 [Source:NCBI gene;Acc:419941]	0.487238	0.0982764	0.492695	1.94341	1.31339	0.778665	0.267183	-1.9041	0.0183357
MSTRG.74111	EPM2A;FBXO30	ENSGALT00000031806;ENSGALT00000081948;ENSGALT00000074665;ENSGALT00000065059	GO:0000045(autophagosome assembly);GO:0001558(regulation of cell growth);GO:0001932(regulation of protein phosphorylation);GO:0004721(phosphoprotein phosphatase activity);GO:0004722(protein serine/threonine phosphatase activity);GO:0004725(protein tyrosine phosphatase activity);GO:0005634(nucleus);GO:0005654(nucleoplasm);GO:0005737(cytoplasm);GO:0005829(cytosol);GO:0005844(polysome);GO:0005977(gl…	NA	EPM2A, laforin glucan phosphatase [Source:NCBI gene;Acc:421611];F-box protein 30 [Source:NCBI gene;Acc:421612]	8.23374	1.50623	1.78503	14.7329	15.0272	12.6652	0.271654	-1.88016	0.00161109
MSTRG.108528	ENSGALG00000006989	ENSGALT00000105717;ENSGALT00000100499;ENSGALT00000011320	GO:0008146(sulfotransferase activity);GO:0008467([heparan sulfate]-glucosamine 3-sulfotransferase 1 activity);GO:0015012(heparan sulfate proteoglycan biosynthetic process);GO:0016740(transferase activity);GO:0034483(heparan sulfate sulfotransferase activity);GO:0034483(heparan sulfate sulfotransferase activity)	00534(Glycosaminoglycan biosynthesis - heparan sulfate / heparin);00534(Glycosaminoglycan biosynthesis - heparan sulfate / heparin)	heparan sulfate glucosamine 3-O-sulfotransferase 1-like [Source:NCBI gene;Acc:423822]	0.570553	0.293676	0.433558	1.62524	1.61605	1.40209	0.279492	-1.83912	0.0177394
MSTRG.37906	ENSGALG00000052952	ENSGALT00000005779	GO:0005548(phospholipid transporter activity);GO:0005622(intracellular);GO:0005737(cytoplasm);GO:0008525(phosphatidylcholine transporter activity);GO:0008526(phosphatidylinositol transporter activity);GO:0015914(phospholipid transport);GO:0031210(phosphatidylcholine binding);GO:0035091(phosphatidylinositol binding);GO:0046872(metal ion binding)	NA		1.02524	0.694218	0.503633	2.64149	2.13392	3.14512	0.280674	-1.83303	0.011471
MSTRG.117489	CNN3;ALG14	ENSGALT00000088788;ENSGALT00000008961	GO:0003779(actin binding);GO:0005515(protein binding);GO:0005516(calmodulin binding);GO:0005829(cytosol);GO:0015629(actin cytoskeleton);GO:0030855(epithelial cell differentiation);GO:0031032(actomyosin structure organization);GO:0004577(N-acetylglucosaminyldiphosphodolichol N-acetylglucosaminyltransferase activity);GO:0006488(dolichol-linked oligosaccharide biosynthetic process);GO:0016020(membra…	00510(N-Glycan biosynthesis)	calponin 3 [Source:NCBI gene;Acc:424485];ALG14, UDP-N-acetylglucosaminyltransferase subunit [Source:NCBI gene;Acc:424484]	38.7223	13.6648	17.6052	38.8712	109.622	100.625	0.28096	-1.83157	0.000360601
MSTRG.75052	MYB	ENSGALT00000066091;ENSGALT00000022624;ENSGALT00000059556	GO:0000122(negative regulation of transcription by RNA polymerase II);GO:0000978(RNA polymerase II proximal promoter sequence-specific DNA binding);GO:0003677(DNA binding);GO:0006338(chromatin remodeling);GO:0006355(regulation of transcription, DNA-templated);GO:0045624(positive regulation of T-helper cell differentiation);GO:0045892(negative regulation of transcription, DNA-templated);GO:0045893…	NA	MYB proto-oncogene, transcription factor [Source:NCBI gene;Acc:396244]	0.736391	0.198656	0.329102	1.00453	1.88262	1.50365	0.287908	-1.79632	0.0150061
MSTRG.112092	ENSGALG00000045898	ENSGALT00000098605;ENSGALT00000087961	GO:0000775(chromosome, centromeric region);GO:0005634(nucleus);GO:0045132(meiotic chromosome segregation);GO:0051754(meiotic sister chromatid cohesion, centromeric);GO:0071962(mitotic sister chromatid cohesion, centromeric);GO:0071962(mitotic sister chromatid cohesion, centromeric)	NA	shugoshin 2 [Source:NCBI gene;Acc:424070]	0.305045	0.406795	0.709843	1.68372	1.26687	1.98041	0.288315	-1.79428	0.0126835
MSTRG.36931	SPSB3	ENSGALT00000003589	GO:0004842(ubiquitin-protein transferase activity);GO:0005515(protein binding);GO:0006511(ubiquitin-dependent protein catabolic process);GO:0016567(protein ubiquitination);GO:0019005(SCF ubiquitin ligase complex);GO:0043161(proteasome-mediated ubiquitin-dependent protein catabolic process)	NA	splA/ryanodine receptor domain and SOCS box containing 3 [Source:NCBI gene;Acc:416401]	0.946036	1.67211	1.30705	5.94663	4.18495	3.41775	0.289696	-1.78739	0.00023671
MSTRG.62952	MXD1	ENSGALT00000022511	GO:0000122(negative regulation of transcription by RNA polymerase II);GO:0000790(nuclear chromatin);GO:0000978(RNA polymerase II proximal promoter sequence-specific DNA binding);GO:0001227(DNA-binding transcription repressor activity, RNA polymerase II-specific);GO:0005654(nucleoplasm);GO:0005739(mitochondrion);GO:0005829(cytosol);GO:0046983(protein dimerization activity)	NA	MAX dimerization protein 1 [Source:NCBI gene;Acc:426299]	1.34818	0.423925	0.324719	3.43872	3.41811	0.349423	0.290973	-1.78104	0.0421186
MSTRG.55836	PREX2	ENSGALT00000073633	GO:0005085(guanyl-nucleotide exchange factor activity);GO:0005089(Rho guanyl-nucleotide exchange factor activity);GO:0005096(GTPase activator activity);GO:0005515(protein binding);GO:0005886(plasma membrane);GO:0007186(G protein-coupled receptor signaling pathway);GO:0008344(adult locomotory behavior);GO:0014065(phosphatidylinositol 3-kinase signaling);GO:0030676(Rac guanyl-nucleotide exchange fa…	NA	phosphatidylinositol-3,4,5-trisphosphate dependent Rac exchange factor 2 [Source:NCBI gene;Acc:420172]	0.266537	0.313645	0.263197	1.02787	0.761348	1.07836	0.294108	-1.76558	0.0250458
MSTRG.44610	CREM	ENSGALT00000045398;ENSGALT00000076104;ENSGALT00000011472;ENSGALT00000092431;ENSGALT00000064767	GO:0000122(negative regulation of transcription by RNA polymerase II);GO:0000977(RNA polymerase II regulatory region sequence-specific DNA binding);GO:0003677(DNA binding);GO:0003700(DNA-binding transcription factor activity);GO:0005515(protein binding);GO:0005634(nucleus);GO:0005667(transcription factor complex);GO:0006355(regulation of transcription, DNA-templated);GO:0006687(glycosphingolipid …	04261(Adrenergic signaling in cardiomyocytes);04261(Adrenergic signaling in cardiomyocytes)	cAMP responsive element modulator [Source:NCBI gene;Acc:378903]	0.463308	0.881839	0.429735	2.12471	2.27789	1.63001	0.294214	-1.76506	0.0143024
MSTRG.13972	ATP6AP2	ENSGALT00000036654;ENSGALT00000026187	GO:0002003(angiotensin maturation);GO:0009897(external side of plasma membrane);GO:0016020(membrane);GO:0016021(integral component of membrane);GO:0021903(rostrocaudal neural tube patterning);GO:0030177(positive regulation of Wnt signaling pathway);GO:0032914(positive regulation of transforming growth factor beta1 production);GO:0038023(signaling receptor activity);GO:0043408(regulation of MAPK c…	NA	ATPase H+ transporting accessory protein 2 [Source:NCBI gene;Acc:418573]	4.67635	4.89346	2.20732	10.2687	15.5052	13.8935	0.296897	-1.75197	0.000332826
MSTRG.38991	ENSGALG00000051428	ENSGALT00000100704;ENSGALT00000104545	GO:0003676(nucleic acid binding);GO:0003676(nucleic acid binding)	NA	zinc finger protein 665-like [Source:NCBI gene;Acc:100859084]	0.784078	1.19195	0.324676	1.25492	0.729115	5.7651	0.296898	-1.75196	0.0197815
MSTRG.50326	C1orf145	ENSGALT00000031049	NA	NA	chromosome 1 open reading frame 145 [Source:NCBI gene;Acc:770433]	2.26487	3.11665	1.01649	2.30782	6.27249	12.826	0.298884	-1.74234	0.00514047
MSTRG.46990	BTD	ENSGALT00000105585;ENSGALT00000018291	GO:0006768(biotin metabolic process);GO:0006807(nitrogen compound metabolic process);GO:0016811(hydrolase activity, acting on carbon-nitrogen (but not peptide) bonds, in linear amides);GO:0016811(hydrolase activity, acting on carbon-nitrogen (but not peptide) bonds, in linear amides)	00780(Biotin metabolism);00780(Biotin metabolism)	biotinidase [Source:NCBI gene;Acc:420639]	0.886284	0.929785	0.939072	3.0344	2.29832	3.85085	0.300008	-1.73693	0.002716
MSTRG.37256	ENSGALG00000002042	ENSGALT00000029798	NA	NA	lysine-rich nucleolar protein 1 [Source:NCBI gene;Acc:426994]	2.48951	1.49903	1.09595	3.31772	4.78864	8.65104	0.303418	-1.72062	0.00318132
MSTRG.67131	BORCS8	ENSGALT00000069337;ENSGALT00000023513	GO:0007507(heart development);GO:0099078(BORC complex);GO:0099078(BORC complex)	NA	BLOC-1 related complex subunit 8 [Source:NCBI gene;Acc:426622]	3.99261	0.958966	5.4731	15.549	7.18499	11.3427	0.305918	-1.70878	0.0124484
MSTRG.65949	TAF8	ENSGALT00000045819;ENSGALT00000005533	GO:0005634(nucleus);GO:0005654(nucleoplasm);GO:0005669(transcription factor TFIID complex);GO:0005737(cytoplasm);GO:0007275(multicellular organism development);GO:0030154(cell differentiation);GO:0045598(regulation of fat cell differentiation);GO:0045893(positive regulation of transcription, DNA-templated);GO:0046982(protein heterodimerization activity);GO:0048471(perinuclear region of cytoplasm)…	03022(Basal transcription factors);03022(Basal transcription factors)	TATA-box binding protein associated factor 8 [Source:NCBI gene;Acc:419929]	1.86245	1.6701	0.134159	1.76987	4.49401	5.61908	0.308569	-1.69634	0.04001
MSTRG.129602	AK6	ENSGALT00000032789	GO:0000166(nucleotide binding);GO:0004017(adenylate kinase activity);GO:0005524(ATP binding);GO:0005634(nucleus);GO:0005654(nucleoplasm);GO:0005737(cytoplasm);GO:0005829(cytosol);GO:0015030(Cajal body);GO:0016301(kinase activity);GO:0016310(phosphorylation);GO:0016740(transferase activity);GO:0016887(ATPase activity);GO:0046940(nucleoside monophosphate phosphorylation)	00230(Purine metabolism);03008(Ribosome biogenesis in eukaryotes)	adenylate kinase 6 [Source:NCBI gene;Acc:425215]	2.70938	2.18603	0.446717	3.34498	6.14275	7.73547	0.31017	-1.68887	0.00957829
MSTRG.20313	RFXAP	ENSGALT00000100590;ENSGALT00000030112	GO:0003677(DNA binding);GO:0005634(nucleus);GO:0016607(nuclear speck);GO:0045893(positive regulation of transcription, DNA-templated);GO:0045893(positive regulation of transcription, DNA-templated)	NA	regulatory factor X associated protein [Source:NCBI gene;Acc:418899]	2.0442	2.00142	1.83482	13.4829	2.83429	2.63621	0.310259	-1.68845	0.00858589
MSTRG.63000	GPAT2	ENSGALT00000053967	GO:0004366(glycerol-3-phosphate O-acyltransferase activity);GO:0005739(mitochondrion);GO:0006072(glycerol-3-phosphate metabolic process);GO:0008374(O-acyltransferase activity);GO:0016746(transferase activity, transferring acyl groups);GO:0019432(triglyceride biosynthetic process);GO:0044255(cellular lipid metabolic process);GO:1990511(piRNA biosynthetic process)	00561(Glycerolipid metabolism);00564(Glycerophospholipid metabolism)	glycerol-3-phosphate acyltransferase 2, mitochondrial [Source:NCBI gene;Acc:426550]	0.660892	0.74519	0.207091	1.59098	1.37597	2.17437	0.313766	-1.67224	0.0157698
MSTRG.2039	ZBED4	ENSGALT00000061375	GO:0003677(DNA binding);GO:0005634(nucleus);GO:0005654(nucleoplasm);GO:0005737(cytoplasm);GO:0046983(protein dimerization activity)	NA	zinc finger BED-type containing 4 [Source:NCBI gene;Acc:417734]	5.10294	7.47878	0.930659	14.9655	16.0161	12.0742	0.313834	-1.67193	0.00390988
MSTRG.112113	ORC2	ENSGALT00000013401	GO:0000784(nuclear chromosome, telomeric region);GO:0000785(chromatin);GO:0000792(heterochromatin);GO:0000808(origin recognition complex);GO:0000939(condensed chromosome inner kinetochore);GO:0003688(DNA replication origin binding);GO:0005634(nucleus);GO:0005654(nucleoplasm);GO:0005664(nuclear origin of replication recognition complex);GO:0005813(centrosome);GO:0006260(DNA replication)	04110(Cell cycle)	origin recognition complex subunit 2 [Source:NCBI gene;Acc:424077]	0.787578	0.541648	0.450852	2.00211	1.72859	1.90777	0.315702	-1.66336	0.0099144
MSTRG.62771	TM2D2	ENSGALT00000068086	GO:0016020(membrane);GO:0016021(integral component of membrane)	NA	TM2 domain containing 2 [Source:NCBI gene;Acc:426780]	2.67822	2.07091	0.726675	9.23073	5.14246	2.92392	0.316573	-1.65939	0.0191229
MSTRG.111356	AHR1B	ENSGALT00000006888	GO:0003677(DNA binding);GO:0003700(DNA-binding transcription factor activity);GO:0005515(protein binding);GO:0005634(nucleus);GO:0006355(regulation of transcription, DNA-templated);GO:0006805(xenobiotic metabolic process);GO:0009410(response to xenobiotic stimulus);GO:0034751(aryl hydrocarbon receptor complex);GO:0046983(protein dimerization activity)	NA	aryl hydrocarbon receptor 1 beta [Source:NCBI gene;Acc:100859347]	1.07311	1.007	0.282825	3.72381	1.70871	2.01478	0.317288	-1.65613	0.0289848
MSTRG.25248	CILP	ENSGALT00000078388;ENSGALT00000011900	GO:0005615(extracellular space);GO:0010629(negative regulation of gene expression);GO:0043569(negative regulation of insulin-like growth factor receptor signaling pathway);GO:0060392(negative regulation of SMAD protein signal transduction);GO:0062023(collagen-containing extracellular matrix);GO:0071560(cellular response to transforming growth factor beta stimulus);GO:0071560(cellular response to …	NA	cartilage intermediate layer protein [Source:NCBI gene;Acc:415533]	1.60972	0.328576	0.505446	3.49151	2.29586	1.80923	0.321689	-1.63626	0.0214578
MSTRG.80846	LDAH	ENSGALT00000108094;ENSGALT00000031583	NA	NA	lipid droplet associated hydrolase [Source:NCBI gene;Acc:421967]	3.5967	2.33182	2.7546	8.93535	9.38076	8.64348	0.322079	-1.63451	7.80162e-05
MSTRG.94531	FAM53A	ENSGALT00000025340;ENSGALT00000087265	GO:0005634(nucleus);GO:0006606(protein import into nucleus);GO:0006606(protein import into nucleus)	NA	family with sequence similarity 53 member A [Source:NCBI gene;Acc:378905]	1.49639	1.22117	1.13692	2.3737	5.51856	4.07104	0.322193	-1.634	0.005592
MSTRG.101115	LIN52	ENSGALT00000091614;ENSGALT00000051341;ENSGALT00000032565	GO:0006351(transcription, DNA-templated);GO:0070176(DRM complex);GO:0070176(DRM complex)	04218(Cellular senescence);04218(Cellular senescence)	lin-52 DREAM MuvB core complex component [Source:NCBI gene;Acc:423346]	0.560914	1.00496	0.739722	0.531863	3.20016	3.39096	0.323685	-1.62734	0.0212185
MSTRG.63309	LDLRAP1;ENSGALG00000048098	ENSGALT00000001574;ENSGALT00000103959;ENSGALT00000096981	GO:0001540(amyloid-beta binding);GO:0001784(phosphotyrosine residue binding);GO:0005546(phosphatidylinositol-4,5-bisphosphate binding);GO:0005737(cytoplasm);GO:0005769(early endosome);GO:0005829(cytosol);GO:0005883(neurofilament);GO:0006898(receptor-mediated endocytosis);GO:0009898(cytoplasmic side of plasma membrane);GO:0009925(basal plasma membrane);GO:0009967(positive regulation of signal tran…	04144(Endocytosis);04144(Endocytosis)	low density lipoprotein receptor adaptor protein 1 [Source:NCBI gene;Acc:419589]	1.03034	1.04659	1.27845	5.57662	1.61513	3.03782	0.328008	-1.6082	0.00494591
MSTRG.74785	ADGRG6	ENSGALT00000037506;ENSGALT00000022408;ENSGALT00000089812	GO:0004888(transmembrane signaling receptor activity);GO:0004930(G protein-coupled receptor activity);GO:0005886(plasma membrane);GO:0005887(integral component of plasma membrane);GO:0007005(mitochondrion organization);GO:0007165(signal transduction);GO:0007166(cell surface receptor signaling pathway);GO:0007186(G protein-coupled receptor signaling pathway);GO:0007189(adenylate cyclase-activating…	NA	adhesion G protein-coupled receptor G6 [Source:NCBI gene;Acc:421673]	1.82706	0.972133	0.564162	3.32966	3.18896	3.57033	0.333371	-1.5848	0.00325912
MSTRG.95325	FEN1	ENSGALT00000065146	GO:0000287(magnesium ion binding);GO:0000784(nuclear chromosome, telomeric region);GO:0003677(DNA binding);GO:0003824(catalytic activity);GO:0004518(nuclease activity);GO:0004519(endonuclease activity);GO:0004523(RNA-DNA hybrid ribonuclease activity);GO:0004527(exonuclease activity);GO:0005634(nucleus);GO:0005654(nucleoplasm);GO:0005730(nucleolus);GO:0005739(mitochondrion);GO:0006260(DNA replicat…	03030(DNA replication);03410(Base excision repair);03450(Non-homologous end-joining)	flap structure-specific endonuclease 1 [Source:NCBI gene;Acc:769677]	1.03458	3.65068	7.44947	8.70719	10.3444	17.1553	0.33515	-1.57712	0.009819
MSTRG.15888	SLC9A7	ENSGALT00000062891	GO:0005886(plasma membrane);GO:0006811(ion transport);GO:0006812(cation transport);GO:0006814(sodium ion transport);GO:0006885(regulation of pH);GO:0015297(antiporter activity);GO:0015299(solute:proton antiporter activity);GO:0015385(sodium:proton antiporter activity);GO:0015386(potassium:proton antiporter activity);GO:0016020(membrane);GO:0016021(integral component of membrane);GO:0043231(intrac…	NA	solute carrier family 9 member A7 [Source:NCBI gene;Acc:418676]	1.28125	0.758189	0.871199	2.42636	3.04253	3.10426	0.339506	-1.55849	0.0110332
MSTRG.40486	ADPRM	ENSGALT00000106675;ENSGALT00000081425	GO:0016787(hydrolase activity);GO:0016787(hydrolase activity)	00230(Purine metabolism);00564(Glycerophospholipid metabolism);00564(Glycerophospholipid metabolism)	ADP-ribose/CDP-alcohol diphosphatase, manganese dependent [Source:NCBI gene;Acc:768578]	1.90844	3.90178	0.948709	7.9058	5.64506	6.24708	0.341396	-1.55048	0.00815139
MSTRG.90236	BBS12	ENSGALT00000105271	GO:0005524(ATP binding);GO:0042073(intraciliary transport);GO:0042755(eating behavior);GO:0045494(photoreceptor cell maintenance);GO:0045599(negative regulation of fat cell differentiation);GO:0051131(chaperone-mediated protein complex assembly)	NA	Bardet-Biedl syndrome 12 [Source:NCBI gene;Acc:422667]	0.250145	1.46007	2.09273	2.78271	4.81437	3.5059	0.342515	-1.54576	0.0309426
MSTRG.114161	CNTNAP5	ENSGALT00000018885	GO:0016020(membrane);GO:0016021(integral component of membrane)	NA	contactin associated protein like 5 [Source:NCBI gene;Acc:424231]	0.850034	1.60857	1.14681	3.46488	2.65981	4.34022	0.344523	-1.53733	0.0032456
MSTRG.8643	CDKN1B	ENSGALT00000037288	GO:0000082(G1/S transition of mitotic cell cycle);GO:0004860(protein kinase inhibitor activity);GO:0004861(cyclin-dependent protein serine/threonine kinase inhibitor activity);GO:0005634(nucleus);GO:0005737(cytoplasm);GO:0005829(cytosol);GO:0006813(potassium ion transport);GO:0007050(cell cycle arrest);GO:0007096(regulation of exit from mitosis);GO:0007219(Notch signaling pathway);GO:0007507(hear…	04012(ErbB signaling pathway);04068(FoxO signaling pathway);04110(Cell cycle);04933(AGE-RAGE signaling pathway in diabetic complications)	cyclin dependent kinase inhibitor 1B [Source:NCBI gene;Acc:374106]	8.92101	5.9183	9.89107	25.5345	16.7603	29.2804	0.345516	-1.53318	0.000425846
MSTRG.43051	VEZF1	ENSGALT00000039049	GO:0000977(RNA polymerase II regulatory region sequence-specific DNA binding);GO:0001228(DNA-binding transcription activator activity, RNA polymerase II-specific);GO:0001525(angiogenesis);GO:0001885(endothelial cell development);GO:0003676(nucleic acid binding);GO:0005634(nucleus);GO:0005654(nucleoplasm);GO:0045603(positive regulation of endothelial cell differentiation);GO:0045944(positive regul…	NA	vascular endothelial zinc finger 1 [Source:NCBI gene;Acc:417664]	4.58825	3.52569	1.3847	8.04459	9.99725	9.42323	0.345845	-1.5318	0.00245991
MSTRG.57359	SLC25A32	ENSGALT00000048847	GO:0008517(folic acid transmembrane transporter activity);GO:0015230(FAD transmembrane transporter activity);GO:0015884(folic acid transport);GO:0016020(membrane);GO:0016021(integral component of membrane);GO:0022857(transmembrane transporter activity);GO:0035350(FAD transmembrane transport);GO:0055085(transmembrane transport)	NA	solute carrier family 25 member 32 [Source:NCBI gene;Acc:428377]	3.44304	5.41536	1.8472	10.2174	9.53122	11.1724	0.346225	-1.53022	0.00187015
MSTRG.34496	ANKRD61	ENSGALT00000098827	GO:0005515(protein binding)	NA	ankyrin repeat domain 61 [Source:NCBI gene;Acc:101752127]	0.835224	0.537855	1.37444	3.63519	2.10345	2.14935	0.348317	-1.52153	0.028891
MSTRG.26571	SALL1	ENSGALT00000065986;ENSGALT00000061547;ENSGALT00000069721	GO:0000122(negative regulation of transcription by RNA polymerase II);GO:0000792(heterochromatin);GO:0000978(RNA polymerase II proximal promoter sequence-specific DNA binding);GO:0001227(DNA-binding transcription repressor activity, RNA polymerase II-specific);GO:0001822(kidney development);GO:0003337(mesenchymal to epithelial transition involved in metanephros morphogenesis);GO:0003676(nucleic a…	NA	spalt like transcription factor 1 [Source:NCBI gene;Acc:395446]	2.50475	0.509294	0.81462	2.7479	6.4265	1.67059	0.353036	-1.50211	0.0268336
MSTRG.13613	ABCG1	ENSGALT00000026046	GO:0000166(nucleotide binding);GO:0005524(ATP binding);GO:0005548(phospholipid transporter activity);GO:0005739(mitochondrion);GO:0005768(endosome);GO:0006355(regulation of transcription, DNA-templated);GO:0008203(cholesterol metabolic process);GO:0009897(external side of plasma membrane);GO:0010033(response to organic substance);GO:0010872(regulation of cholesterol esterification);GO:0010875(pos…	02010(ABC transporters)	ATP binding cassette subfamily G member 1 [Source:NCBI gene;Acc:418533]	0.898254	0.771244	0.325711	1.18308	2.76262	1.6989	0.353472	-1.50033	0.0400033
MSTRG.109346	DCLRE1A	ENSGALT00000033097	GO:0000784(nuclear chromosome, telomeric region);GO:0001650(fibrillar center);GO:0003684(damaged DNA binding);GO:0005654(nucleoplasm);GO:0006303(double-strand break repair via nonhomologous end joining);GO:0031848(protection from non-homologous end joining at telomere);GO:0035312(5'-3' exodeoxyribonuclease activity);GO:0036297(interstrand cross-link repair);GO:0090305(nucleic acid phosphodiester …	NA	DNA cross-link repair 1A [Source:NCBI gene;Acc:423902]	1.60502	3.11203	2.6888	6.52601	8.76799	5.6094	0.35429	-1.497	0.00113912
MSTRG.112269	CREB1	ENSGALT00000013839;ENSGALT00000085874	GO:0000790(nuclear chromatin);GO:0000978(RNA polymerase II proximal promoter sequence-specific DNA binding);GO:0000980(RNA polymerase II distal enhancer sequence-specific DNA binding);GO:0000981(DNA-binding transcription factor activity, RNA polymerase II-specific);GO:0001102(RNA polymerase II activating transcription factor binding);GO:0001228(DNA-binding transcription activator activity, RNA po…	04261(Adrenergic signaling in cardiomyocytes);04916(Melanogenesis);04916(Melanogenesis)	cAMP responsive element binding protein 1 [Source:NCBI gene;Acc:395099]	1.44996	1.45028	0.730811	4.01899	4.66168	1.53817	0.355328	-1.49278	0.00774006
MSTRG.129007	ZNF462;gga-mir-6565	ENSGALT00000024915;ENSGALT00000045262;ENSGALT00000046749;ENSGALT00000104253	GO:0000979(RNA polymerase II core promoter sequence-specific DNA binding);GO:0003676(nucleic acid binding);GO:0005634(nucleus);GO:0006325(chromatin organization);GO:0010468(regulation of gene expression);GO:0035097(histone methyltransferase complex);GO:0043392(negative regulation of DNA binding);GO:0045944(positive regulation of transcription by RNA polymerase II);GO:0045944(positive regulation o…	NA	zinc finger protein 462 [Source:HGNC Symbol;Acc:HGNC:21684];gga-mir-6565 [Source:miRBase;Acc:MI0022382]	3.84871	3.09147	1.72331	3.95972	6.83274	13.2636	0.360137	-1.47338	0.00340164
MSTRG.3354	PRICKLE1	ENSGALT00000015558;ENSGALT00000077783	GO:0001843(neural tube closure);GO:0005634(nucleus);GO:0005829(cytosol);GO:0006606(protein import into nucleus);GO:0008270(zinc ion binding);GO:0031398(positive regulation of protein ubiquitination);GO:0031965(nuclear membrane);GO:0032436(positive regulation of proteasomal ubiquitin-dependent protein catabolic process);GO:0035904(aorta development);GO:0045892(negative regulation of transcription,…	04310(Wnt signaling pathway);04310(Wnt signaling pathway)	prickle planar cell polarity protein 1 [Source:NCBI gene;Acc:417793]	3.266	1.38545	3.01645	7.50046	7.53194	6.20613	0.361037	-1.46978	0.00359573
MSTRG.99577	ENSGALG00000009345	ENSGALT00000015217	GO:0005515(protein binding)	NA	DDB1 and CUL4 associated factor 4 [Source:NCBI gene;Acc:423253]	2.53449	1.33533	0.947093	2.95878	3.87822	6.364	0.36489	-1.45447	0.0320158
MSTRG.92606	ARAP2	ENSGALT00000064650;ENSGALT00000052752;ENSGALT00000059926	GO:0005096(GTPase activator activity);GO:0005515(protein binding);GO:0005547(phosphatidylinositol-3,4,5-trisphosphate binding);GO:0007165(signal transduction);GO:0043547(positive regulation of GTPase activity);GO:0046872(metal ion binding);GO:0046872(metal ion binding)	04144(Endocytosis);04144(Endocytosis)	ArfGAP with RhoGAP domain, ankyrin repeat and PH domain 2 [Source:NCBI gene;Acc:428790]	2.0021	0.591262	0.879174	2.04906	4.50488	2.93016	0.366143	-1.44952	0.00985917
MSTRG.75180	SGK1;SLC2A12	ENSGALT00000031766;ENSGALT00000090679;ENSGALT00000022653;ENSGALT00000092402;ENSGALT00000099132	GO:0000166(nucleotide binding);GO:0004672(protein kinase activity);GO:0004674(protein serine/threonine kinase activity);GO:0004712(protein serine/threonine/tyrosine kinase activity);GO:0005524(ATP binding);GO:0005634(nucleus);GO:0005737(cytoplasm);GO:0005783(endoplasmic reticulum);GO:0005829(cytosol);GO:0006468(protein phosphorylation);GO:0006915(apoptotic process);GO:0006974(cellular response to…	04068(FoxO signaling pathway);04150(mTOR signaling pathway);04150(mTOR signaling pathway)	serum/glucocorticoid regulated kinase 1 [Source:NCBI gene;Acc:395133];solute carrier family 2 member 12 [Source:NCBI gene;Acc:421696]	4.43042	2.24817	2.54403	9.91011	7.82996	7.2478	0.369084	-1.43798	0.000674469
MSTRG.60323	ENSGALG00000025872	ENSGALT00000043038	GO:0003810(protein-glutamine gamma-glutamyltransferase activity);GO:0018149(peptide cross-linking)	NA	protein-glutamine gamma-glutamyltransferase 6-like [Source:NCBI gene;Acc:771136]	1.63714	1.03019	1.91751	4.09091	4.67699	3.59289	0.370919	-1.43083	0.00354288
MSTRG.95040	SLC4A11	ENSGALT00000106489;ENSGALT00000062841	GO:0005272(sodium channel activity);GO:0005452(inorganic anion exchanger activity);GO:0005887(integral component of plasma membrane);GO:0006814(sodium ion transport);GO:0006820(anion transport);GO:0015106(bicarbonate transmembrane transporter activity);GO:0015252(proton channel activity);GO:0015701(bicarbonate transport);GO:0016020(membrane);GO:0016021(integral component of membrane);GO:0030003(c…	NA	solute carrier family 4 member 11 [Source:NCBI gene;Acc:422943]	1.28154	2.0268	0.98438	4.68895	3.23399	3.61699	0.371989	-1.42667	0.00463095
MSTRG.104099	TMEM260	ENSGALT00000019792	GO:0016020(membrane);GO:0016021(integral component of membrane)	NA	transmembrane protein 260 [Source:NCBI gene;Acc:423551]	1.60992	1.39678	0.531017	2.88806	3.79572	2.81901	0.372282	-1.42553	0.0333912
MSTRG.74935	TNFAIP3	ENSGALT00000062647;ENSGALT00000022483	GO:0001922(B-1 B cell homeostasis);GO:0002020(protease binding);GO:0002237(response to molecule of bacterial origin);GO:0002634(regulation of germinal center formation);GO:0002677(negative regulation of chronic inflammatory response);GO:0003677(DNA binding);GO:0004842(ubiquitin-protein transferase activity);GO:0004843(thiol-dependent ubiquitin-specific protease activity);GO:0005634(nucleus);GO:00…	04217(Necroptosis);04621(NOD-like receptor signaling pathway);04621(NOD-like receptor signaling pathway)	TNF alpha induced protein 3 [Source:NCBI gene;Acc:421684]	0.924614	1.26639	2.92937	6.0391	3.86233	3.73623	0.375458	-1.41328	0.0213564
MSTRG.56112	PI15	ENSGALT00000065508	GO:0005576(extracellular region);GO:0005615(extracellular space);GO:0007275(multicellular organism development);GO:0010466(negative regulation of peptidase activity);GO:0030414(peptidase inhibitor activity)	NA	peptidase inhibitor 15 [Source:NCBI gene;Acc:374241]	3.77189	1.74622	4.60035	3.28636	8.23563	15.3592	0.376415	-1.40961	0.0118811
MSTRG.22397	ENSGALG00000052611	ENSGALT00000093422	NA	NA		0.701901	0.851743	1.22689	1.9333	2.50886	2.93401	0.376962	-1.40751	0.02319
MSTRG.16511	TMCO3	ENSGALT00000043071;ENSGALT00000102100	GO:0006812(cation transport);GO:0015299(solute:proton antiporter activity);GO:0016020(membrane);GO:0016021(integral component of membrane);GO:0055085(transmembrane transport);GO:1902600(proton transmembrane transport);GO:1902600(proton transmembrane transport)	NA	transmembrane and coiled-coil domains 3 [Source:NCBI gene;Acc:395675]	1.72266	1.44229	1.32704	4.39034	3.71487	3.66446	0.381658	-1.38965	0.00449483
MSTRG.108091	C10orf71	ENSGALT00000045209	NA	NA	chromosome 6 open reading frame, human C10orf71 [Source:NCBI gene;Acc:423784]	0.259752	0.950011	0.549215	1.40981	1.73466	1.44101	0.383597	-1.38234	0.0467746
MSTRG.60462	MRGBP	ENSGALT00000008871;ENSGALT00000100842	GO:0005634(nucleus);GO:0006355(regulation of transcription, DNA-templated);GO:0006357(regulation of transcription by RNA polymerase II);GO:0016573(histone acetylation);GO:0035267(NuA4 histone acetyltransferase complex);GO:0043189(H4/H2A histone acetyltransferase complex);GO:0043189(H4/H2A histone acetyltransferase complex)	NA	MRG/MORF4L binding protein [Source:NCBI gene;Acc:419233]	1.0453	4.13245	2.85087	4.8449	9.28727	6.66262	0.386088	-1.373	0.0222117
MSTRG.128564	NUDT12	ENSGALT00000024645	GO:0000210(NAD+ diphosphatase activity);GO:0005515(protein binding);GO:0005634(nucleus);GO:0005737(cytoplasm);GO:0005777(peroxisome);GO:0005829(cytosol);GO:0006734(NADH metabolic process);GO:0006742(NADP catabolic process);GO:0016787(hydrolase activity);GO:0019677(NAD catabolic process);GO:0035529(NADH pyrophosphatase activity);GO:0046872(metal ion binding)	00760(Nicotinate and nicotinamide metabolism);04146(Peroxisome)	nudix hydrolase 12 [Source:NCBI gene;Acc:768471]	0.718921	1.34124	1.00434	2.82173	2.1203	2.96782	0.387428	-1.368	0.0320698
MSTRG.56616	CPNE3	ENSGALT00000059786	GO:0004674(protein serine/threonine kinase activity);GO:0005544(calcium-dependent phospholipid binding);GO:0005634(nucleus);GO:0005730(nucleolus);GO:0005737(cytoplasm);GO:0005739(mitochondrion);GO:0005829(cytosol);GO:0005886(plasma membrane);GO:0005925(focal adhesion);GO:0006468(protein phosphorylation);GO:0030054(cell junction);GO:0030335(positive regulation of cell migration);GO:0030971(recepto…	NA	copine 3 [Source:NCBI gene;Acc:420214]	7.62154	9.54028	4.64192	21.5206	20.3956	14.2234	0.388385	-1.36444	0.000986898
MSTRG.26777	N4BP1	ENSGALT00000006207	GO:0005634(nucleus);GO:0005730(nucleolus);GO:0016605(PML body);GO:0031397(negative regulation of protein ubiquitination);GO:0032435(negative regulation of proteasomal ubiquitin-dependent protein catabolic process);GO:0034644(cellular response to UV)	NA	NEDD4 binding protein 1 [Source:NCBI gene;Acc:415739]	5.51562	1.45651	4.79429	11.3443	12.1286	6.81148	0.388531	-1.3639	0.00701221
MSTRG.67243	ENSGALG00000027132	ENSGALT00000098300;ENSGALT00000045263	GO:0003712(transcription coregulator activity);GO:0005634(nucleus);GO:0006357(regulation of transcription by RNA polymerase II);GO:0010628(positive regulation of gene expression);GO:0016592(mediator complex);GO:0070847(core mediator complex);GO:0070847(core mediator complex)	NA		2.62917	3.71592	5.14507	10.0704	10.6805	8.79761	0.388857	-1.36269	0.00176581
MSTRG.87594	PGRMC2	ENSGALT00000016602	GO:0005635(nuclear envelope);GO:0016020(membrane);GO:0016021(integral component of membrane)	NA	progesterone receptor membrane component 2 [Source:NCBI gene;Acc:422501]	5.34089	3.75569	15.7768	18.935	23.9699	20.7898	0.390511	-1.35657	0.00938536
MSTRG.85722	CD99L2	ENSGALT00000014767;ENSGALT00000107344;ENSGALT00000091093;ENSGALT00000102040	NA	NA	CD99 molecule like 2 [Source:NCBI gene;Acc:422386]	5.97441	4.1753	1.91528	12.188	5.56356	12.4341	0.399693	-1.32304	0.0124665
MSTRG.78821	RAB23	ENSGALT00000046840;ENSGALT00000026245	GO:0000045(autophagosome assembly);GO:0003924(GTPase activity);GO:0005525(GTP binding);GO:0005737(cytoplasm);GO:0005776(autophagosome);GO:0005813(centrosome);GO:0005829(cytosol);GO:0005886(plasma membrane);GO:0006886(intracellular protein transport);GO:0006968(cellular defense response);GO:0010008(endosome membrane);GO:0030054(cell junction);GO:0032482(Rab protein signal transduction);GO:0042308(…	NA	ras-related protein Rab-23 [Source:NCBI gene;Acc:421879]	5.26893	5.18292	5.13136	11.5801	15.2197	12.1311	0.400278	-1.32093	0.000530372
MSTRG.124778	ITGA2	ENSGALT00000024037;ENSGALT00000070281	GO:0001540(amyloid-beta binding);GO:0005518(collagen binding);GO:0005886(plasma membrane);GO:0005925(focal adhesion);GO:0006929(substrate-dependent cell migration);GO:0007155(cell adhesion);GO:0007160(cell-matrix adhesion);GO:0007229(integrin-mediated signaling pathway);GO:0008305(integrin complex);GO:0009897(external side of plasma membrane);GO:0009986(cell surface);GO:0016020(membrane);GO:00160…	04145(Phagosome);04510(Focal adhesion);04512(ECM-receptor interaction);04810(Regulation of actin cytoskeleton);04810(Regulation of actin cytoskeleton)	integrin subunit alpha 2 [Source:NCBI gene;Acc:100857227]	2.65435	1.87183	1.90916	5.39873	5.22841	5.44172	0.400485	-1.32018	0.0034423
MSTRG.112201	MPP4	ENSGALT00000013679;ENSGALT00000094167;ENSGALT00000104934;ENSGALT00000108025	GO:0005515(protein binding);GO:0005829(cytosol);GO:0005913(cell-cell adherens junction);GO:0015629(actin cytoskeleton);GO:0032991(protein-containing complex);GO:0032991(protein-containing complex)	04530(Tight junction);04530(Tight junction)	membrane palmitoylated protein 4 [Source:NCBI gene;Acc:769757]	1.89097	1.39844	1.39976	3.69795	4.66761	3.33798	0.400663	-1.31954	0.00749983
MSTRG.42775	CTNS	ENSGALT00000007373;ENSGALT00000090410	GO:0002088(lens development in camera-type eye);GO:0005764(lysosome);GO:0005765(lysosomal membrane);GO:0005770(late endosome);GO:0005774(vacuolar membrane);GO:0006749(glutathione metabolic process);GO:0007420(brain development);GO:0007616(long-term memory);GO:0007625(grooming behavior);GO:0007628(adult walking behavior);GO:0008542(visual learning);GO:0015184(L-cystine transmembrane transporter ac…	04142(Lysosome);04142(Lysosome)	cystinosin, lysosomal cystine transporter [Source:NCBI gene;Acc:417606]	2.13542	2.90498	2.0834	7.35378	5.583	4.83735	0.400797	-1.31906	0.00776658
MSTRG.56879	RBM12B	ENSGALT00000078323	GO:0003676(nucleic acid binding);GO:0003723(RNA binding)	NA	RNA binding motif protein 12B [Source:NCBI gene;Acc:420223]	8.16417	7.90018	8.97586	24.5567	18.1769	19.5697	0.401908	-1.31506	0.000382554
MSTRG.38612	RNF185	ENSGALT00000011276;ENSGALT00000099924	GO:0005739(mitochondrion);GO:0005741(mitochondrial outer membrane);GO:0005783(endoplasmic reticulum);GO:0005789(endoplasmic reticulum membrane);GO:0006511(ubiquitin-dependent protein catabolic process);GO:0006914(autophagy);GO:0016020(membrane);GO:0016021(integral component of membrane);GO:0016567(protein ubiquitination);GO:0016740(transferase activity);GO:0030433(ubiquitin-dependent ERAD pathway…	04141(Protein processing in endoplasmic reticulum);04141(Protein processing in endoplasmic reticulum)	ring finger protein 185 [Source:NCBI gene;Acc:416965]	3.52692	8.46739	1.81913	8.76204	11.9533	13.6364	0.402117	-1.31431	0.0143801
MSTRG.67271	RAB8A;TPM4	ENSGALT00000044909;ENSGALT00000039281;ENSGALT00000089035;ENSGALT00000069557	GO:0000166(nucleotide binding);GO:0003924(GTPase activity);GO:0005525(GTP binding);GO:0005768(endosome);GO:0005813(centrosome);GO:0005886(plasma membrane);GO:0005929(cilium);GO:0006886(intracellular protein transport);GO:0006904(vesicle docking involved in exocytosis);GO:0007409(axonogenesis);GO:0008021(synaptic vesicle);GO:0009306(protein secretion);GO:0010506(regulation of autophagy);GO:0015031…	04144(Endocytosis);04530(Tight junction);04260(Cardiac muscle contraction);04261(Adrenergic signaling in cardiomyocytes);04261(Adrenergic signaling in cardiomyocytes)	RAB8A, member RAS oncogene family [Source:NCBI gene;Acc:428352];tropomyosin 4 [Source:NCBI gene;Acc:107055375]	3.55579	4.70855	3.3359	3.31346	14.4347	10.6842	0.407994	-1.29338	0.0102887
MSTRG.45228	PLXDC2	ENSGALT00000012922	GO:0016020(membrane);GO:0016021(integral component of membrane)	NA	plexin domain containing 2 [Source:NCBI gene;Acc:420511]	1.16027	0.627602	0.511464	1.53774	1.8194	2.2781	0.408029	-1.29326	0.0344611
MSTRG.56539	E2F5	ENSGALT00000069458	GO:0000122(negative regulation of transcription by RNA polymerase II);GO:0000981(DNA-binding transcription factor activity, RNA polymerase II-specific);GO:0001650(fibrillar center);GO:0003677(DNA binding);GO:0003700(DNA-binding transcription factor activity);GO:0005634(nucleus);GO:0005667(transcription factor complex);GO:0005730(nucleolus);GO:0005737(cytoplasm);GO:0006355(regulation of transcript…	04110(Cell cycle);04218(Cellular senescence);04350(TGF-beta signaling pathway)	E2F transcription factor 5 [Source:NCBI gene;Acc:420206]	5.38141	2.46067	1.8037	9.7705	7.73765	6.07243	0.409056	-1.28963	0.026574
MSTRG.128902	RNF170	ENSGALT00000042838	GO:0016020(membrane);GO:0016021(integral component of membrane);GO:0016567(protein ubiquitination);GO:0046872(metal ion binding);GO:0061630(ubiquitin protein ligase activity)	NA	ring finger protein 170 [Source:NCBI gene;Acc:427296]	3.2165	9.68279	0.763556	9.09407	10.9107	13.2329	0.411065	-1.28256	0.0495393
MSTRG.46485	AHR	ENSGALT00000017616;ENSGALT00000063813	GO:0001046(core promoter sequence-specific DNA binding);GO:0003677(DNA binding);GO:0003700(DNA-binding transcription factor activity);GO:0005515(protein binding);GO:0005634(nucleus);GO:0005667(transcription factor complex);GO:0005737(cytoplasm);GO:0006355(regulation of transcription, DNA-templated);GO:0006805(xenobiotic metabolic process);GO:0009410(response to xenobiotic stimulus);GO:0014070(res…	NA	aryl hydrocarbon receptor [Source:NCBI gene;Acc:373907]	2.00201	2.33826	2.49586	4.69601	6.60419	5.28543	0.412171	-1.27868	0.00270369
MSTRG.56189	ZFHX4	ENSGALT00000068709;ENSGALT00000094834	GO:0000122(negative regulation of transcription by RNA polymerase II);GO:0000978(RNA polymerase II proximal promoter sequence-specific DNA binding);GO:0003676(nucleic acid binding);GO:0003677(DNA binding);GO:0005634(nucleus);GO:0006355(regulation of transcription, DNA-templated);GO:0008270(zinc ion binding);GO:0043565(sequence-specific DNA binding);GO:0044212(transcription regulatory region DNA b…	NA	zinc finger homeobox 4 [Source:NCBI gene;Acc:395904]	2.46768	0.763871	0.582038	1.46614	4.26289	3.50104	0.41317	-1.27519	0.0357268
MSTRG.41068	MMD	ENSGALT00000004865;ENSGALT00000081755	GO:0004672(protein kinase activity);GO:0005794(Golgi apparatus);GO:0006468(protein phosphorylation);GO:0016020(membrane);GO:0016021(integral component of membrane);GO:0019835(cytolysis);GO:0032880(regulation of protein localization);GO:0045666(positive regulation of neuron differentiation);GO:0045860(positive regulation of protein kinase activity);GO:0045860(positive regulation of protein kinase …	NA	monocyte to macrophage differentiation associated [Source:NCBI gene;Acc:417397]	2.69576	6.11624	4.73676	11.3441	11.4364	9.87712	0.414873	-1.26926	0.00357936
MSTRG.108307	SLC35G1	ENSGALT00000077163	GO:0005789(endoplasmic reticulum membrane);GO:0005886(plasma membrane);GO:0016020(membrane);GO:0016021(integral component of membrane);GO:0051480(regulation of cytosolic calcium ion concentration);GO:1990034(calcium ion export across plasma membrane)	NA	solute carrier family 35 member G1 [Source:NCBI gene;Acc:423800]	14.4423	3.1271	9.17607	25.3269	31.4061	7.66176	0.415335	-1.26765	0.0338125
MSTRG.13536	WRB	ENSGALT00000025891;ENSGALT00000097186	GO:0016020(membrane);GO:0016021(integral component of membrane);GO:0071816(tail-anchored membrane protein insertion into ER membrane);GO:0071816(tail-anchored membrane protein insertion into ER membrane)	NA	tryptophan rich basic protein [Source:NCBI gene;Acc:770415]	2.04093	5.70953	2.02909	9.04192	2.77439	11.7103	0.415681	-1.26645	0.042135
MSTRG.123584	LMAN1	ENSGALT00000079535;ENSGALT00000087589	GO:0000139(Golgi membrane);GO:0005537(mannose binding);GO:0005737(cytoplasm);GO:0005789(endoplasmic reticulum membrane);GO:0005793(endoplasmic reticulum-Golgi intermediate compartment);GO:0006888(endoplasmic reticulum to Golgi vesicle-mediated transport);GO:0007029(endoplasmic reticulum organization);GO:0007030(Golgi organization);GO:0010638(positive regulation of organelle organization);GO:00160…	04141(Protein processing in endoplasmic reticulum);04141(Protein processing in endoplasmic reticulum)	lectin, mannose binding 1 [Source:NCBI gene;Acc:426849]	6.46424	8.09957	7.22986	6.35912	23.838	22.0514	0.417116	-1.26148	0.00901532
MSTRG.103070	CCNK	ENSGALT00000018166	GO:0000079(regulation of cyclin-dependent protein serine/threonine kinase activity);GO:0002944(cyclin K-CDK12 complex);GO:0002945(cyclin K-CDK13 complex);GO:0004693(cyclin-dependent protein serine/threonine kinase activity);GO:0005634(nucleus);GO:0005654(nucleoplasm);GO:0006357(regulation of transcription by RNA polymerase II);GO:0006468(protein phosphorylation);GO:0006974(cellular response to DN…	NA	cyclin K [Source:NCBI gene;Acc:423446]	10.5101	5.34064	7.44365	10.3369	23.6431	21.4937	0.419918	-1.25182	0.00687684
MSTRG.24189	RAMAC	ENSGALT00000081746;ENSGALT00000045923	GO:0003723(RNA binding);GO:0005845(mRNA cap binding complex);GO:0106005(RNA 5'-cap (guanine-N7)-methylation);GO:0106005(RNA 5'-cap (guanine-N7)-methylation)	NA	RNA guanine-7 methyltransferase activating subunit [Source:NCBI gene;Acc:415459]	4.0835	14.6477	5.05846	17.5959	21.8482	17.07	0.420951	-1.24828	0.0142855
MSTRG.59277	ZC3H3	ENSGALT00000063646	GO:0005623(cell);GO:0016973(poly(A)+ mRNA export from nucleus);GO:0046872(metal ion binding)	NA	zinc finger CCCH-type containing 3 [Source:NCBI gene;Acc:430349]	3.6089	3.8556	3.71133	10.878	7.64806	7.96164	0.421925	-1.24494	0.00120291
MSTRG.42509	VKORC1L1	ENSGALT00000003944	GO:0005783(endoplasmic reticulum);GO:0005789(endoplasmic reticulum membrane);GO:0016020(membrane);GO:0016021(integral component of membrane);GO:0017187(peptidyl-glutamic acid carboxylation);GO:0034599(cellular response to oxidative stress);GO:0042373(vitamin K metabolic process);GO:0047057(vitamin-K-epoxide reductase (warfarin-sensitive) activity);GO:0055114(oxidation-reduction process)	00130(Ubiquinone and other terpenoid-quinone biosynthesis)	vitamin K epoxide reductase complex subunit 1 like 1 [Source:NCBI gene;Acc:408253]	9.38767	4.7461	5.03791	9.77282	19.444	16.1225	0.422849	-1.24179	0.00503802
MSTRG.72413	NDUFAF7	ENSGALT00000017260	GO:0005739(mitochondrion);GO:0008168(methyltransferase activity);GO:0016740(transferase activity);GO:0019899(enzyme binding);GO:0019918(peptidyl-arginine methylation, to symmetrical-dimethyl arginine);GO:0032259(methylation);GO:0032981(mitochondrial respiratory chain complex I assembly);GO:0035243(protein-arginine omega-N symmetric methyltransferase activity)	NA	NADH:ubiquinone oxidoreductase complex assembly factor 7 [Source:NCBI gene;Acc:421477]	1.84285	1.77129	1.72531	3.58714	3.75191	5.25369	0.42401	-1.23783	0.0149249
MSTRG.92312	GNPDA2	ENSGALT00000055886;ENSGALT00000066745	GO:0004342(glucosamine-6-phosphate deaminase activity);GO:0005737(cytoplasm);GO:0005975(carbohydrate metabolic process);GO:0006043(glucosamine catabolic process);GO:0006044(N-acetylglucosamine metabolic process);GO:0006046(N-acetylglucosamine catabolic process);GO:0006048(UDP-N-acetylglucosamine biosynthetic process);GO:0016787(hydrolase activity);GO:0019262(N-acetylneuraminate catabolic process)…	00520(Amino sugar and nucleotide sugar metabolism);00520(Amino sugar and nucleotide sugar metabolism)	glucosamine-6-phosphate deaminase 2 [Source:NCBI gene;Acc:422772]	2.20104	1.28198	4.2866	4.53817	7.26413	6.4851	0.424862	-1.23493	0.0242035
MSTRG.130147	TNFAIP8	ENSGALT00000053329;ENSGALT00000059398;ENSGALT00000095195;ENSGALT00000043006	GO:0005654(nucleoplasm);GO:0005737(cytoplasm);GO:0006915(apoptotic process);GO:0042981(regulation of apoptotic process);GO:0043027(cysteine-type endopeptidase inhibitor activity involved in apoptotic process);GO:0043065(positive regulation of apoptotic process);GO:0043154(negative regulation of cysteine-type endopeptidase activity involved in apoptotic process);GO:0043154(negative regulation of c…	NA	TNF alpha induced protein 8 [Source:NCBI gene;Acc:427384]	0.656933	1.22668	4.08012	4.91841	4.97819	4.13881	0.424906	-1.23478	0.0389116
MSTRG.10327	PCNP	ENSGALT00000024744	GO:0005634(nucleus);GO:0016567(protein ubiquitination);GO:0016604(nuclear body);GO:0043161(proteasome-mediated ubiquitin-dependent protein catabolic process)	NA	PEST proteolytic signal containing nuclear protein [Source:NCBI gene;Acc:418398]	7.78243	2.90858	1.71091	8.01881	16.5155	4.57245	0.426085	-1.23079	0.04446
MSTRG.120389	EPHA4	ENSGALT00000008440;ENSGALT00000047480	GO:0000166(nucleotide binding);GO:0001756(somitogenesis);GO:0004672(protein kinase activity);GO:0004713(protein tyrosine kinase activity);GO:0004714(transmembrane receptor protein tyrosine kinase activity);GO:0005003(ephrin receptor activity);GO:0005004(GPI-linked ephrin receptor activity);GO:0005005(transmembrane-ephrin receptor activity);GO:0005515(protein binding);GO:0005524(ATP binding);GO:00…	NA	EPH receptor A4 [Source:NCBI gene;Acc:395559]	1.72721	1.46399	1.35181	4.38445	2.99256	3.24316	0.427771	-1.22509	0.00808309
MSTRG.13080	TMEM50B	ENSGALT00000084124	GO:0005783(endoplasmic reticulum);GO:0016020(membrane);GO:0016021(integral component of membrane);GO:0032511(late endosome to vacuole transport via multivesicular body sorting pathway)	NA	transmembrane protein 50B [Source:NCBI gene;Acc:418503]	4.19827	7.32642	2.56768	12.5404	9.50107	10.8841	0.428007	-1.22429	0.0070194
MSTRG.103920	SIX4	ENSGALT00000028076	GO:0000976(transcription regulatory region sequence-specific DNA binding);GO:0000978(RNA polymerase II proximal promoter sequence-specific DNA binding);GO:0000981(DNA-binding transcription factor activity, RNA polymerase II-specific);GO:0001228(DNA-binding transcription activator activity, RNA polymerase II-specific);GO:0003677(DNA binding);GO:0003700(DNA-binding transcription factor activity);GO…	NA	SIX homeobox 4 [Source:NCBI gene;Acc:395601]	2.95995	1.20552	1.86429	5.02227	4.92855	4.11427	0.428704	-1.22195	0.00995933
MSTRG.6662	MRPS33	ENSGALT00000044679	NA	NA	mitochondrial ribosomal protein S33 [Source:NCBI gene;Acc:418119]	9.92856	4.48473	3.54472	14.7114	6.11282	21.0033	0.429335	-1.21982	0.03532
MSTRG.116731	ABL2	ENSGALT00000063074;ENSGALT00000067489;ENSGALT00000062566;ENSGALT00000076866	GO:0000166(nucleotide binding);GO:0000287(magnesium ion binding);GO:0001784(phosphotyrosine residue binding);GO:0004672(protein kinase activity);GO:0004713(protein tyrosine kinase activity);GO:0004715(non-membrane spanning protein tyrosine kinase activity);GO:0005515(protein binding);GO:0005524(ATP binding);GO:0005623(cell);GO:0006468(protein phosphorylation);GO:0007204(positive regulation of cyt…	04012(ErbB signaling pathway);04012(ErbB signaling pathway)	ABL proto-oncogene 2, non-receptor tyrosine kinase [Source:NCBI gene;Acc:395410]	2.70989	2.8753	1.7255	5.00427	5.41625	6.60424	0.429415	-1.21955	0.00853563
MSTRG.33803	PHYKPL	ENSGALT00000023235;ENSGALT00000105611	GO:0003824(catalytic activity);GO:0008483(transaminase activity);GO:0030170(pyridoxal phosphate binding);GO:0042802(identical protein binding);GO:0042802(identical protein binding)	00310(Lysine degradation);00310(Lysine degradation)	5-phosphohydroxy-L-lysine phospho-lyase [Source:NCBI gene;Acc:416374]	4.23113	10.1848	4.55099	19.3401	21.4839	3.22991	0.430539	-1.21578	0.0412681
MSTRG.44583	CCNY	ENSGALT00000064833	GO:0000079(regulation of cyclin-dependent protein serine/threonine kinase activity);GO:0000086(G2/M transition of mitotic cell cycle);GO:0000308(cytoplasmic cyclin-dependent protein kinase holoenzyme complex);GO:0005634(nucleus);GO:0005886(plasma membrane);GO:0016538(cyclin-dependent protein serine/threonine kinase regulator activity);GO:0019901(protein kinase binding);GO:0045737(positive regulat…	NA	cyclin Y [Source:NCBI gene;Acc:428412]	5.40042	2.7298	3.50299	6.65925	9.43313	10.9203	0.430657	-1.21539	0.0271146
MSTRG.124835	ENSGALG00000020561	ENSGALT00000032852;ENSGALT00000102238	GO:0016020(membrane);GO:0016021(integral component of membrane);GO:0016021(integral component of membrane)	NA	FRAS1 related extracellular matrix 3 [Source:NCBI gene;Acc:425372]	0.534158	0.706822	1.16038	2.07146	1.38941	2.1151	0.430662	-1.21537	0.0221915
MSTRG.17297	METTL21C	ENSGALT00000027243	GO:0005634(nucleus);GO:0006479(protein methylation);GO:0007519(skeletal muscle tissue development);GO:0008628(hormone-mediated apoptotic signaling pathway);GO:0010880(regulation of release of sequestered calcium ion into cytosol by sarcoplasmic reticulum);GO:0016020(membrane);GO:0016021(integral component of membrane);GO:0016279(protein-lysine N-methyltransferase activity);GO:0018022(peptidyl-lys…	NA	methyltransferase like 21C [Source:NCBI gene;Acc:418768]	12.7528	5.29877	4.11748	15.8802	20.9018	14.5353	0.432	-1.2109	0.0178315
MSTRG.3460	SLC38A1	ENSGALT00000015787	GO:0003333(amino acid transmembrane transport);GO:0005886(plasma membrane);GO:0005887(integral component of plasma membrane);GO:0006868(glutamine transport);GO:0015171(amino acid transmembrane transporter activity);GO:0015186(L-glutamine transmembrane transporter activity);GO:0016020(membrane);GO:0016021(integral component of membrane);GO:0030424(axon)	NA	solute carrier family 38 member 1 [Source:NCBI gene;Acc:417806]	7.44702	4.78451	18.3227	21.7303	22.8917	25.7321	0.434292	-1.20326	0.00899554
MSTRG.38271	ESS2	ENSGALT00000009461	GO:0071013(catalytic step 2 spliceosome)	NA	ess-2 splicing factor homolog [Source:HGNC Symbol;Acc:HGNC:16817]	1.25055	2.18523	3.07909	4.87429	5.75466	4.34978	0.434942	-1.20111	0.00992104
MSTRG.122567	TRIM59	ENSGALT00000078299;ENSGALT00000039192	GO:0005783(endoplasmic reticulum);GO:0008270(zinc ion binding);GO:0016567(protein ubiquitination);GO:0043124(negative regulation of I-kappaB kinase/NF-kappaB signaling);GO:0045087(innate immune response);GO:0046597(negative regulation of viral entry into host cell);GO:0046872(metal ion binding);GO:0061630(ubiquitin protein ligase activity);GO:0061630(ubiquitin protein ligase activity)	NA	tripartite motif containing 59 [Source:NCBI gene;Acc:425013]	4.09346	3.50169	3.96702	6.1621	10.9946	9.41063	0.435202	-1.20024	0.00383515
MSTRG.4529	NAV3	ENSGALT00000104030;ENSGALT00000102652;ENSGALT00000091198;ENSGALT00000094699;ENSGALT00000016778;ENSGALT00000102821;ENSGALT00000091169;ENSGALT00000104500;ENSGALT00000092313	GO:0005515(protein binding);GO:0005524(ATP binding);GO:0007026(negative regulation of microtubule depolymerization);GO:0007399(nervous system development);GO:0008017(microtubule binding);GO:0022008(neurogenesis);GO:0030336(negative regulation of cell migration);GO:0031116(positive regulation of microtubule polymerization);GO:0032703(negative regulation of interleukin-2 production);GO:1905929(posi…	NA	neuron navigator 3 [Source:NCBI gene;Acc:417869]	2.58277	2.27564	1.41008	5.97869	4.20226	4.15017	0.437404	-1.19296	0.00521246
MSTRG.48441	EEPD1	ENSGALT00000055028	GO:0003677(DNA binding);GO:0006281(DNA repair)	NA	endonuclease/exonuclease/phosphatase family domain containing 1 [Source:NCBI gene;Acc:420740]	3.07115	4.05606	0.765983	6.24011	5.95857	5.78452	0.438921	-1.18797	0.0400123
MSTRG.33235	MFAP3	ENSGALT00000006432;ENSGALT00000096787	GO:0016020(membrane);GO:0016021(integral component of membrane);GO:0016021(integral component of membrane)	NA	microfibrillar associated protein 3 [Source:NCBI gene;Acc:416261]	31.7572	5.58318	7.21474	31.9174	33.5056	35.9514	0.439511	-1.18603	0.0442678
MSTRG.2109	PIM3	ENSGALT00000039200	GO:0000166(nucleotide binding);GO:0004672(protein kinase activity);GO:0004674(protein serine/threonine kinase activity);GO:0005524(ATP binding);GO:0005737(cytoplasm);GO:0005829(cytosol);GO:0006468(protein phosphorylation);GO:0007346(regulation of mitotic cell cycle);GO:0016301(kinase activity);GO:0016310(phosphorylation);GO:0016740(transferase activity);GO:0043066(negative regulation of apoptotic…	NA	pim-3 oncogene [Source:NCBI gene;Acc:768655]	10.9226	12.3945	9.77398	26.8807	19.8583	28.4773	0.439946	-1.1846	0.00327826
MSTRG.69604	TTL	ENSGALT00000014035	GO:0000166(nucleotide binding);GO:0000226(microtubule cytoskeleton organization);GO:0004835(tubulin-tyrosine ligase activity);GO:0005623(cell);GO:0006464(cellular protein modification process);GO:0018166(C-terminal protein-tyrosinylation);GO:0030516(regulation of axon extension);GO:0045931(positive regulation of mitotic cell cycle);GO:0090235(regulation of metaphase plate congression)	NA	tubulin tyrosine ligase [Source:NCBI gene;Acc:416711]	12.1897	10.0762	10.3786	25.638	21.0891	27.1255	0.442023	-1.17781	0.0013998
MSTRG.82028	ENSGALG00000049609	ENSGALT00000103581	GO:0003676(nucleic acid binding)	NA	zinc finger protein 624-like [Source:NCBI gene;Acc:426821]	4.63733	3.2585	3.82386	10.2481	6.58006	9.58298	0.443741	-1.17221	0.019355
MSTRG.40610	FN3KRP	ENSGALT00000043083;ENSGALT00000107763	GO:0016301(kinase activity);GO:0016310(phosphorylation);GO:0016740(transferase activity);GO:0016740(transferase activity)	NA	fructosamine 3 kinase related protein [Source:NCBI gene;Acc:417336]	6.96535	2.447	2.09193	9.51324	7.19244	9.20259	0.444039	-1.17124	0.0338526
MSTRG.40857	RFNG	ENSGALT00000004482	GO:0000139(Golgi membrane);GO:0005794(Golgi apparatus);GO:0007389(pattern specification process);GO:0008375(acetylglucosaminyltransferase activity);GO:0008593(regulation of Notch signaling pathway);GO:0016020(membrane);GO:0016740(transferase activity);GO:0016757(transferase activity, transferring glycosyl groups);GO:0030173(integral component of Golgi membrane);GO:0032092(positive regulation of p…	00514(Other types of O-glycan biosynthesis);04330(Notch signaling pathway)	RFNG O-fucosylpeptide 3-beta-N-acetylglucosaminyltransferase [Source:NCBI gene;Acc:395789]	7.96821	3.18716	5.28489	13.6211	12.2445	11.1446	0.444209	-1.17069	0.00828851
MSTRG.34822	C7orf50;CYP2W1	ENSGALT00000105461;ENSGALT00000090340;ENSGALT00000103266;ENSGALT00000034197	GO:0004497(monooxygenase activity);GO:0005506(iron ion binding);GO:0005737(cytoplasm);GO:0005788(endoplasmic reticulum lumen);GO:0006082(organic acid metabolic process);GO:0006805(xenobiotic metabolic process);GO:0008395(steroid hydroxylase activity);GO:0009986(cell surface);GO:0016020(membrane);GO:0016021(integral component of membrane);GO:0016491(oxidoreductase activity);GO:0016705(oxidoreducta…	NA	chromosome 14 C7orf50 homolog [Source:NCBI gene;Acc:416455];cytochrome P450, family 2, subfamily W, polypeptide 2 [Source:NCBI gene;Acc:416454]	1.02293	1.56149	0.65688	2.49795	2.0335	2.76486	0.444238	-1.17059	0.0336401
MSTRG.41047	COX11	ENSGALT00000043415;ENSGALT00000105905	GO:0005507(copper ion binding);GO:0005739(mitochondrion);GO:0016020(membrane);GO:0016021(integral component of membrane);GO:0031305(integral component of mitochondrial inner membrane);GO:0032991(protein-containing complex);GO:0033132(negative regulation of glucokinase activity);GO:0055065(metal ion homeostasis);GO:0055065(metal ion homeostasis)	00190(Oxidative phosphorylation);00190(Oxidative phosphorylation)	cytochrome c oxidase copper chaperone COX11 [Source:NCBI gene;Acc:770638]	2.37694	1.43523	1.51018	4.19377	3.15862	4.58665	0.445795	-1.16555	0.0446647
MSTRG.48955	EGFR	ENSGALT00000052129;ENSGALT00000056722	GO:0000166(nucleotide binding);GO:0000902(cell morphogenesis);GO:0001934(positive regulation of protein phosphorylation);GO:0003682(chromatin binding);GO:0004672(protein kinase activity);GO:0004713(protein tyrosine kinase activity);GO:0004714(transmembrane receptor protein tyrosine kinase activity);GO:0004888(transmembrane signaling receptor activity);GO:0005006(epidermal growth factor-activated …	04010(MAPK signaling pathway);04012(ErbB signaling pathway);04020(Calcium signaling pathway);04068(FoxO signaling pathway);04144(Endocytosis);04510(Focal adhesion);04520(Adherens junction);04540(Gap junction);04810(Regulation of actin cytoskeleton);04912(GnRH signaling pathway);04912(GnRH signaling pathway)	epidermal growth factor receptor [Source:NCBI gene;Acc:396494]	1.44658	0.880676	0.762716	2.68528	2.33537	1.9006	0.446448	-1.16344	0.0170722
MSTRG.22571	ENSGALG00000017336	ENSGALT00000028018	GO:0005515(protein binding)	04120(Ubiquitin mediated proteolysis)	F-box/WD repeat-containing protein 7-like [Source:NCBI gene;Acc:419074]	3.17825	1.9795	3.12958	7.9129	4.44583	6.14429	0.447891	-1.15878	0.0270799
MSTRG.22430	SERPINH1	ENSGALT00000018287	GO:0003433(chondrocyte development involved in endochondral bone morphogenesis);GO:0004867(serine-type endopeptidase inhibitor activity);GO:0005518(collagen binding);GO:0005615(extracellular space);GO:0005737(cytoplasm);GO:0005783(endoplasmic reticulum);GO:0005788(endoplasmic reticulum lumen);GO:0005793(endoplasmic reticulum-Golgi intermediate compartment);GO:0010951(negative regulation of endope…	NA	serpin family H member 1 [Source:NCBI gene;Acc:396228]	15.4326	18.179	10.0282	11.5362	16.3491	69.3625	0.448749	-1.15602	0.0478357
MSTRG.56081	ELOC	ENSGALT00000065415	GO:0004842(ubiquitin-protein transferase activity);GO:0006511(ubiquitin-dependent protein catabolic process);GO:0016567(protein ubiquitination);GO:0032968(positive regulation of transcription elongation from RNA polymerase II promoter);GO:0070449(elongin complex)	04120(Ubiquitin mediated proteolysis)	elongin C [Source:NCBI gene;Acc:420187]	13.6004	8.34262	14.8446	27.1576	32.4053	22.3981	0.448843	-1.15572	0.00418
MSTRG.62624	KCTD9	ENSGALT00000000362	GO:0005515(protein binding);GO:0035556(intracellular signal transduction);GO:0042802(identical protein binding);GO:0043621(protein self-association);GO:0051260(protein homooligomerization);GO:0097602(cullin family protein binding)	NA	potassium channel tetramerization domain containing 9 [Source:NCBI gene;Acc:419526]	1.79575	3.31579	5.15398	6.12094	9.92925	6.78443	0.44956	-1.15342	0.0146317
MSTRG.61159	ENSGALG00000040886;ENSGALG00000040546	ENSGALT00000075799;ENSGALT00000074130	GO:0003676(nucleic acid binding);GO:0045892(negative regulation of transcription, DNA-templated)	NA		1.12858	1.47164	1.54859	3.2163	3.0499	2.92832	0.451226	-1.14808	0.0107961
MSTRG.25024	NR2F2	ENSGALT00000094852;ENSGALT00000069791;ENSGALT00000011332	GO:0000122(negative regulation of transcription by RNA polymerase II);GO:0001764(neuron migration);GO:0001937(negative regulation of endothelial cell proliferation);GO:0001945(lymph vessel development);GO:0001972(retinoic acid binding);GO:0003677(DNA binding);GO:0003700(DNA-binding transcription factor activity);GO:0003707(steroid hormone receptor activity);GO:0004879(nuclear receptor activity);G…	NA	nuclear receptor subfamily 2 group F member 2 [Source:NCBI gene;Acc:386585]	8.37524	7.8914	5.59087	8.372	18.083	21.9612	0.45145	-1.14736	0.0138853
MSTRG.96513	DEPDC7	ENSGALT00000086635	GO:0035556(intracellular signal transduction)	NA	DEP domain containing 7 [Source:NCBI gene;Acc:421593]	3.09939	2.37448	2.90299	8.67766	4.99872	4.87838	0.451466	-1.14731	0.0413711
MSTRG.84857	NEXMIF	ENSGALT00000012575	GO:0001953(negative regulation of cell-matrix adhesion);GO:0005634(nucleus);GO:0033629(negative regulation of cell adhesion mediated by integrin);GO:2000048(negative regulation of cell-cell adhesion mediated by cadherin);GO:2001223(negative regulation of neuron migration)	NA	neurite extension and migration factor [Source:NCBI gene;Acc:422325]	1.29083	0.826784	1.76588	2.07439	2.78044	3.72896	0.452422	-1.14426	0.0159266
MSTRG.23703	PIGB	ENSGALT00000053275	GO:0000030(mannosyltransferase activity);GO:0005783(endoplasmic reticulum);GO:0005789(endoplasmic reticulum membrane);GO:0006506(GPI anchor biosynthetic process);GO:0016020(membrane);GO:0016021(integral component of membrane);GO:0016757(transferase activity, transferring glycosyl groups);GO:0097502(mannosylation)	00563(Glycosylphosphatidylinositol (GPI)-anchor biosynthesis)	phosphatidylinositol glycan anchor biosynthesis class B [Source:NCBI gene;Acc:100858627]	4.12724	1.62445	2.97922	7.34668	5.21356	6.61053	0.455429	-1.1347	0.0420824
MSTRG.101958	FLRT2	ENSGALT00000017230	GO:0003007(heart morphogenesis);GO:0005104(fibroblast growth factor receptor binding);GO:0005515(protein binding);GO:0005615(extracellular space);GO:0005887(integral component of plasma membrane);GO:0005911(cell-cell junction);GO:0005925(focal adhesion);GO:0007411(axon guidance);GO:0008543(fibroblast growth factor receptor signaling pathway);GO:0016020(membrane);GO:0016021(integral component of m…	NA	fibronectin leucine rich transmembrane protein 2 [Source:NCBI gene;Acc:428901]	6.15106	4.97301	5.00734	11.9974	12.5504	10.8676	0.455491	-1.13451	0.00291601
MSTRG.4978	MKP3	ENSGALT00000038357;ENSGALT00000105883	GO:0000188(inactivation of MAPK activity);GO:0001933(negative regulation of protein phosphorylation);GO:0004721(phosphoprotein phosphatase activity);GO:0004725(protein tyrosine phosphatase activity);GO:0005737(cytoplasm);GO:0005829(cytosol);GO:0006470(protein dephosphorylation);GO:0008138(protein tyrosine/serine/threonine phosphatase activity);GO:0016301(kinase activity);GO:0016310(phosphorylatio…	04010(MAPK signaling pathway);04010(MAPK signaling pathway)	dual specificity phosphatase 6 [Source:NCBI gene;Acc:374272]	3.3576	4.0779	3.01119	7.36297	6.72261	8.71803	0.458115	-1.12622	0.0139788
MSTRG.82185	ARHGAP35	ENSGALT00000065617	GO:0000122(negative regulation of transcription by RNA polymerase II);GO:0000977(RNA polymerase II regulatory region sequence-specific DNA binding);GO:0001227(DNA-binding transcription repressor activity, RNA polymerase II-specific);GO:0001843(neural tube closure);GO:0003924(GTPase activity);GO:0005096(GTPase activator activity);GO:0005525(GTP binding);GO:0005543(phospholipid binding);GO:0005737(…	04510(Focal adhesion);04810(Regulation of actin cytoskeleton)	Rho GTPase activating protein 35 [Source:NCBI gene;Acc:425730]	9.34315	14.6362	7.99692	23.4206	19.2217	26.4568	0.462759	-1.11167	0.00435648
MSTRG.39749	TRUB2	ENSGALT00000007872	GO:0001522(pseudouridine synthesis);GO:0003723(RNA binding);GO:0005829(cytosol);GO:0006396(RNA processing);GO:0009451(RNA modification);GO:0009982(pseudouridine synthase activity);GO:0070131(positive regulation of mitochondrial translation)	NA	TruB pseudouridine synthase family member 2 [Source:NCBI gene;Acc:417218]	3.62706	3.35753	2.62311	7.31086	3.91359	9.47206	0.464218	-1.10712	0.0427658
MSTRG.20571	USPL1	ENSGALT00000027590;ENSGALT00000036455	GO:0006508(proteolysis);GO:0008283(cell population proliferation);GO:0009301(snRNA transcription);GO:0015030(Cajal body);GO:0016926(protein desumoylation);GO:0030576(Cajal body organization);GO:0032183(SUMO binding);GO:0070140(SUMO-specific isopeptidase activity);GO:0070140(SUMO-specific isopeptidase activity)	NA	ubiquitin specific peptidase like 1 [Source:NCBI gene;Acc:395436]	6.07336	5.4056	6.08104	10.1004	13.5187	14.17	0.464685	-1.10568	0.0038734
MSTRG.112726	NFE2L2	ENSGALT00000105575;ENSGALT00000091300;ENSGALT00000099980;ENSGALT00000095862;ENSGALT00000106525;ENSGALT00000104173;ENSGALT00000098865;ENSGALT00000094715;ENSGALT00000091770;ENSGALT00000033290	GO:0000785(chromatin);GO:0000976(transcription regulatory region sequence-specific DNA binding);GO:0000980(RNA polymerase II distal enhancer sequence-specific DNA binding);GO:0001102(RNA polymerase II activating transcription factor binding);GO:0001228(DNA-binding transcription activator activity, RNA polymerase II-specific);GO:0003677(DNA binding);GO:0003700(DNA-binding transcription factor acti…	04141(Protein processing in endoplasmic reticulum);04141(Protein processing in endoplasmic reticulum)	nuclear factor, erythroid 2 like 2 [Source:NCBI gene;Acc:396014]	6.32651	2.66425	1.9158	6.50698	9.19898	7.7595	0.464792	-1.10534	0.0329203
MSTRG.120260	PXYLP1	ENSGALT00000096476;ENSGALT00000050908;ENSGALT00000056475;ENSGALT00000077379;ENSGALT00000070049	GO:0005794(Golgi apparatus);GO:0006024(glycosaminoglycan biosynthetic process);GO:0010909(positive regulation of heparan sulfate proteoglycan biosynthetic process);GO:0016020(membrane);GO:0016021(integral component of membrane);GO:0016311(dephosphorylation);GO:0016791(phosphatase activity);GO:0050650(chondroitin sulfate proteoglycan biosynthetic process);GO:0050650(chondroitin sulfate proteoglyca…	NA	2-phosphoxylose phosphatase 1 [Source:NCBI gene;Acc:424815]	6.53358	2.77811	3.78005	10.6679	9.96814	7.51558	0.465044	-1.10456	0.0119293
MSTRG.116533	VAMP4	ENSGALT00000071912	GO:0000226(microtubule cytoskeleton organization);GO:0005794(Golgi apparatus);GO:0009986(cell surface);GO:0016020(membrane);GO:0016021(integral component of membrane);GO:0016192(vesicle-mediated transport);GO:0035493(SNARE complex assembly);GO:0090161(Golgi ribbon formation)	04130(SNARE interactions in vesicular transport)	vesicle associated membrane protein 4 [Source:NCBI gene;Acc:770513]	4.03011	2.18727	2.92272	5.95088	8.1153	5.50264	0.467074	-1.09828	0.0336486
MSTRG.63926	MYOM3;IL22RA1	ENSGALT00000006605;ENSGALT00000006712	GO:0005515(protein binding);GO:0005865(striated muscle thin filament);GO:0006936(muscle contraction);GO:0008307(structural constituent of muscle);GO:0030017(sarcomere);GO:0030018(Z disc);GO:0030240(skeletal muscle thin filament assembly);GO:0030241(skeletal muscle myosin thick filament assembly);GO:0031430(M band);GO:0042803(protein homodimerization activity);GO:0045214(sarcomere organization);GO…	NA	myomesin 3 [Source:NCBI gene;Acc:419690];interleukin 22 receptor subunit alpha 1 [Source:HGNC Symbol;Acc:HGNC:13700]	2.82112	2.13361	2.84295	5.98935	3.17501	7.52598	0.467198	-1.09789	0.0100685
MSTRG.43083	AKAP1	ENSGALT00000008944	GO:0003676(nucleic acid binding);GO:0003723(RNA binding);GO:0005739(mitochondrion);GO:0010738(regulation of protein kinase A signaling);GO:0016020(membrane);GO:0016021(integral component of membrane);GO:0034237(protein kinase A regulatory subunit binding)	NA	A-kinase anchoring protein 1 [Source:NCBI gene;Acc:417668]	9.22453	6.28984	2.5501	12.2822	5.80003	20.5195	0.46797	-1.09551	0.0489793
MSTRG.3313	ZCRB1	ENSGALT00000015532	GO:0000398(mRNA splicing, via spliceosome);GO:0003676(nucleic acid binding);GO:0003723(RNA binding);GO:0005689(U12-type spliceosomal complex);GO:0008270(zinc ion binding)	NA	zinc finger CCHC-type and RNA binding motif containing 1 [Source:NCBI gene;Acc:417791]	2.47134	1.92479	2.40537	3.1303	6.50704	4.8842	0.468373	-1.09427	0.0259773
MSTRG.130190	SEMA6A	ENSGALT00000082049;ENSGALT00000003608;ENSGALT00000062503;ENSGALT00000054585;ENSGALT00000067390	GO:0001755(neural crest cell migration);GO:0001764(neuron migration);GO:0004888(transmembrane signaling receptor activity);GO:0005515(protein binding);GO:0005615(extracellular space);GO:0005887(integral component of plasma membrane);GO:0007166(cell surface receptor signaling pathway);GO:0007411(axon guidance);GO:0016020(membrane);GO:0016021(integral component of membrane);GO:0030215(semaphorin re…	NA	semaphorin 6A [Source:NCBI gene;Acc:427387]	1.94359	0.960158	1.04375	2.95607	2.65045	2.81074	0.468976	-1.09241	0.0360099
MSTRG.110509	NEMP2	ENSGALT00000097827;ENSGALT00000054091	GO:0005635(nuclear envelope);GO:0016020(membrane);GO:0016021(integral component of membrane);GO:0016021(integral component of membrane)	NA	nuclear envelope integral membrane protein 2 [Source:NCBI gene;Acc:423977]	2.21865	1.88146	2.927	4.18603	3.36513	7.31892	0.472567	-1.08141	0.0268548
MSTRG.76593	BEND3	ENSGALT00000024718;ENSGALT00000101978	GO:0000122(negative regulation of transcription by RNA polymerase II);GO:0000182(rDNA binding);GO:0000183(chromatin silencing at rDNA);GO:0003677(DNA binding);GO:0005654(nucleoplasm);GO:0005720(nuclear heterochromatin);GO:0005730(nucleolus);GO:0006306(DNA methylation);GO:0034773(histone H4-K20 trimethylation);GO:0036124(histone H3-K9 trimethylation);GO:0043967(histone H4 acetylation);GO:0051260(p…	NA	BEN domain containing 3 [Source:NCBI gene;Acc:421778]	4.74836	6.4119	7.17871	11.1483	13.0362	14.4268	0.474963	-1.07411	0.00927925
MSTRG.119479	DBR1	ENSGALT00000050471	GO:0000375(RNA splicing, via transesterification reactions);GO:0000398(mRNA splicing, via spliceosome);GO:0005634(nucleus);GO:0005654(nucleoplasm);GO:0006397(mRNA processing);GO:0008419(RNA lariat debranching enzyme activity);GO:0016787(hydrolase activity);GO:0016788(hydrolase activity, acting on ester bonds);GO:0090502(RNA phosphodiester bond hydrolysis, endonucleolytic)	NA	debranching RNA lariats 1 [Source:NCBI gene;Acc:429118]	21.1088	7.30237	8.73948	25.4879	25.9448	26.5457	0.476422	-1.06969	0.0218259
MSTRG.65454	MFSD4A	ENSGALT00000000983	GO:0005355(glucose transmembrane transporter activity);GO:0016020(membrane);GO:0016021(integral component of membrane);GO:1904659(glucose transmembrane transport)	NA	major facilitator superfamily domain containing 4A [Source:NCBI gene;Acc:419831]	4.37091	1.78295	2.98445	5.32461	4.47242	9.34646	0.477359	-1.06685	0.04988
MSTRG.95285	VPS37C	ENSGALT00000067837;ENSGALT00000047600	GO:0000813(ESCRT I complex);GO:0006612(protein targeting to membrane);GO:0006623(protein targeting to vacuole);GO:0015031(protein transport);GO:0032509(endosome transport via multivesicular body sorting pathway);GO:0043162(ubiquitin-dependent protein catabolic process via the multivesicular body sorting pathway);GO:0043231(intracellular membrane-bounded organelle);GO:0048306(calcium-dependent pro…	04144(Endocytosis);04144(Endocytosis)	VPS37C, ESCRT-I subunit [Source:NCBI gene;Acc:423023]	1.77784	3.49207	3.22637	5.87549	6.8715	5.04948	0.477413	-1.06669	0.0317653
MSTRG.89643	ADAMTS3	ENSGALT00000018988	GO:0004175(endopeptidase activity);GO:0004222(metalloendopeptidase activity);GO:0005615(extracellular space);GO:0006508(proteolysis);GO:0008233(peptidase activity);GO:0008237(metallopeptidase activity);GO:0010573(vascular endothelial growth factor production);GO:0016485(protein processing);GO:0032964(collagen biosynthetic process);GO:1900748(positive regulation of vascular endothelial growth fact…	NA	ADAM metallopeptidase with thrombospondin type 1 motif 3 [Source:NCBI gene;Acc:428760]	1.64018	1.56241	1.30276	3.72163	2.65791	3.05169	0.477706	-1.06581	0.0253492
MSTRG.113447	CERS6	ENSGALT00000017733;ENSGALT00000100027	GO:0003677(DNA binding);GO:0005634(nucleus);GO:0005783(endoplasmic reticulum);GO:0016020(membrane);GO:0016021(integral component of membrane);GO:0046513(ceramide biosynthetic process);GO:0050291(sphingosine N-acyltransferase activity);GO:0050291(sphingosine N-acyltransferase activity)	00600(Sphingolipid metabolism);00600(Sphingolipid metabolism)	ceramide synthase 6 [Source:NCBI gene;Acc:771503]	5.66228	2.53696	5.85631	6.78623	15.4599	6.97614	0.480987	-1.05593	0.0228884
MSTRG.7343	ADA2;HDHD5	ENSGALT00000096704;ENSGALT00000106653;ENSGALT00000095034;ENSGALT00000108047;ENSGALT00000096173;ENSGALT00000064670;ENSGALT00000030546;ENSGALT00000021270	GO:0004000(adenosine deaminase activity);GO:0005615(extracellular space);GO:0006154(adenosine catabolic process);GO:0008083(growth factor activity);GO:0008270(zinc ion binding);GO:0010469(regulation of signaling receptor activity);GO:0019239(deaminase activity);GO:0031685(adenosine receptor binding);GO:0042803(protein homodimerization activity);GO:0043394(proteoglycan binding);GO:0046103(inosine …	00230(Purine metabolism);00230(Purine metabolism)	adenosine deaminase 2 [Source:NCBI gene;Acc:418160];cat eye syndrome chromosome region, candidate 5 [Source:NCBI gene;Acc:418159]	1.77908	1.34781	2.16709	3.56375	2.11702	5.30894	0.481721	-1.05373	0.020319
MSTRG.61479	ENSGALG00000033340	ENSGALT00000075314	NA	NA		1.76911	2.42985	2.7477	4.68685	5.05079	4.63687	0.483263	-1.04912	0.0103676
MSTRG.23696	RAB27A;PIGBOS1	ENSGALT00000106709;ENSGALT00000062010;ENSGALT00000068179;ENSGALT00000007059;ENSGALT00000060103	GO:0001750(photoreceptor outer segment);GO:0003924(GTPase activity);GO:0005525(GTP binding);GO:0005764(lysosome);GO:0005770(late endosome);GO:0005794(Golgi apparatus);GO:0006605(protein targeting);GO:0006886(intracellular protein transport);GO:0006887(exocytosis);GO:0007596(blood coagulation);GO:0010628(positive regulation of gene expression);GO:0016192(vesicle-mediated transport);GO:0019003(GDP …	NA	RAB27A, member RAS oncogene family [Source:NCBI gene;Acc:415410];PIGB opposite strand 1 [Source:NCBI gene;Acc:105694155]	13.4291	4.40275	14.1801	23.0245	24.841	18.2324	0.484312	-1.04599	0.0264741
MSTRG.6544	PARP12	ENSGALT00000087175;ENSGALT00000095476	GO:0003950(NAD+ ADP-ribosyltransferase activity);GO:0046872(metal ion binding);GO:0070213(protein auto-ADP-ribosylation);GO:0140289(protein mono-ADP-ribosylation);GO:1990404(protein ADP-ribosylase activity);GO:1990404(protein ADP-ribosylase activity)	NA	poly(ADP-ribose) polymerase family member 12 [Source:NCBI gene;Acc:418100]	3.39275	6.55483	2.1082	5.44573	10.7465	8.6225	0.485831	-1.04147	0.035867
MSTRG.89039	KLHL8	ENSGALT00000017951;ENSGALT00000079253	GO:0005515(protein binding);GO:0005654(nucleoplasm);GO:0006511(ubiquitin-dependent protein catabolic process);GO:0016567(protein ubiquitination);GO:0031463(Cul3-RING ubiquitin ligase complex);GO:0031463(Cul3-RING ubiquitin ligase complex)	NA	kelch like family member 8 [Source:NCBI gene;Acc:422589]	2.54892	2.11938	1.41859	4.32608	4.52711	3.65159	0.486765	-1.0387	0.0314322
MSTRG.62873	ARID5A	ENSGALT00000102471;ENSGALT00000100858;ENSGALT00000073275	GO:0000122(negative regulation of transcription by RNA polymerase II);GO:0003677(DNA binding);GO:0003714(transcription corepressor activity);GO:0005634(nucleus);GO:0005654(nucleoplasm);GO:0005730(nucleolus);GO:0006357(regulation of transcription by RNA polymerase II);GO:0008134(transcription factor binding);GO:0030331(estrogen receptor binding);GO:0043565(sequence-specific DNA binding);GO:0044212…	NA	AT rich interactive domain 5A (MRF1-like) [Source:NCBI gene;Acc:101749459]	4.32579	3.71733	3.02371	6.75258	5.70916	10.1844	0.488686	-1.03302	0.013947
MSTRG.122366	ENSGALG00000009409	ENSGALT00000101988;ENSGALT00000015328	GO:0003676(nucleic acid binding);GO:0005515(protein binding);GO:0005515(protein binding)	NA	myoneurin [Source:NCBI gene;Acc:771218]	4.18735	4.15504	4.06775	8.75096	8.18368	8.38655	0.490109	-1.02883	0.00667752
MSTRG.40810	WBP2	ENSGALT00000003475	GO:0000790(nuclear chromatin);GO:0000978(RNA polymerase II proximal promoter sequence-specific DNA binding);GO:0003713(transcription coactivator activity);GO:0005634(nucleus);GO:0005737(cytoplasm);GO:0030331(estrogen receptor binding);GO:0031490(chromatin DNA binding);GO:0032570(response to progesterone);GO:0033148(positive regulation of intracellular estrogen receptor signaling pathway);GO:00436…	NA	WW domain binding protein 2 [Source:NCBI gene;Acc:417368]	3.41195	2.5846	3.28483	6.68236	6.95191	5.26332	0.491141	-1.02579	0.0361354
MSTRG.65298	STK38	ENSGALT00000000721	GO:0000166(nucleotide binding);GO:0000287(magnesium ion binding);GO:0004672(protein kinase activity);GO:0004674(protein serine/threonine kinase activity);GO:0005524(ATP binding);GO:0005634(nucleus);GO:0005737(cytoplasm);GO:0005829(cytosol);GO:0006464(cellular protein modification process);GO:0006468(protein phosphorylation);GO:0016301(kinase activity);GO:0016310(phosphorylation);GO:0016740(transf…	NA	serine/threonine kinase 38 [Source:NCBI gene;Acc:428260]	3.9692	4.1045	4.8494	7.44224	9.39823	9.44455	0.491653	-1.02429	0.00922123
MSTRG.111000	UNC80	ENSGALT00000079083;ENSGALT00000079203	NA	NA	unc-80 homolog, NALCN channel complex subunit [Source:NCBI gene;Acc:424003]	0.621209	0.691915	0.469749	0.990277	1.23509	1.38942	0.493216	-1.01971	0.0350039
MSTRG.115539	NMI	ENSGALT00000088545;ENSGALT00000020390	GO:0003712(transcription coregulator activity);GO:0005654(nucleoplasm);GO:0005737(cytoplasm);GO:0005829(cytosol);GO:0006366(transcription by RNA polymerase II);GO:0032480(negative regulation of type I interferon production);GO:0042802(identical protein binding);GO:0045355(negative regulation of interferon-alpha biosynthetic process);GO:0045358(negative regulation of interferon-beta biosynthetic p…	NA	N-myc and STAT interactor [Source:NCBI gene;Acc:424314]	2.15287	5.22233	5.82658	6.9272	9.38872	10.4027	0.494104	-1.01711	0.0406581
MSTRG.13785	ICOSLG	ENSGALT00000078073	GO:0005887(integral component of plasma membrane);GO:0009897(external side of plasma membrane);GO:0016020(membrane);GO:0016021(integral component of membrane);GO:0045404(positive regulation of interleukin-4 biosynthetic process)	04514(Cell adhesion molecules (CAMs));04672(Intestinal immune network for IgA production)	inducible T cell costimulator ligand [Source:NCBI gene;Acc:395968]	2.84292	1.76697	2.59862	4.34075	5.35343	4.87856	0.494657	-1.0155	0.0336458
MSTRG.8650	ENSGALG00000026896	ENSGALT00000097804;ENSGALT00000043173	GO:0004861(cyclin-dependent protein serine/threonine kinase inhibitor activity);GO:0005634(nucleus);GO:0007050(cell cycle arrest);GO:0007346(regulation of mitotic cell cycle);GO:0016301(kinase activity);GO:0016310(phosphorylation);GO:0045736(negative regulation of cyclin-dependent protein serine/threonine kinase activity);GO:0072331(signal transduction by p53 class mediator);GO:0072331(signal tra…	NA	cyclin dependent kinase inhibitor 1A-like [Source:NCBI gene;Acc:101751545]	1.54775	3.71684	3.07451	5.94522	6.74314	4.14164	0.49549	-1.01307	0.031167
MSTRG.24536	ABHD2	ENSGALT00000095721;ENSGALT00000010812	GO:0001669(acrosomal vesicle);GO:0003707(steroid hormone receptor activity);GO:0007340(acrosome reaction);GO:0009611(response to wounding);GO:0016298(lipase activity);GO:0030336(negative regulation of cell migration);GO:0032570(response to progesterone);GO:0034338(short-chain carboxylesterase activity);GO:0036126(sperm flagellum);GO:0042562(hormone binding);GO:0043401(steroid hormone mediated sig…	NA	abhydrolase domain containing 2 [Source:NCBI gene;Acc:415493]	11.1318	7.77374	11.7917	24.8274	18.5296	18.5434	0.495913	-1.01184	0.00904996
MSTRG.21337	DYNC2H1	ENSGALT00000081130;ENSGALT00000091792;ENSGALT00000070041;ENSGALT00000097006;ENSGALT00000106147;ENSGALT00000078077;ENSGALT00000054818	GO:0003777(microtubule motor activity);GO:0005524(ATP binding);GO:0005794(Golgi apparatus);GO:0005868(cytoplasmic dynein complex);GO:0005874(microtubule);GO:0005930(axoneme);GO:0007018(microtubule-based movement);GO:0007030(Golgi organization);GO:0007368(determination of left/right symmetry);GO:0007507(heart development);GO:0008569(ATP-dependent microtubule motor activity, minus-end-directed);GO:…	04145(Phagosome);05132(Salmonella infection);05132(Salmonella infection)	dynein cytoplasmic 2 heavy chain 1 [Source:NCBI gene;Acc:418979]	2.82024	1.18954	1.73458	4.45408	3.79225	3.27004	0.498799	-1.00347	0.0244424
MSTRG.71688	DAAM2	ENSGALT00000038248;ENSGALT00000081811;ENSGALT00000063049;ENSGALT00000065256	GO:0003779(actin binding);GO:0007368(determination of left/right symmetry);GO:0016043(cellular component organization);GO:0017048(Rho GTPase binding);GO:0021516(dorsal spinal cord development);GO:0030036(actin cytoskeleton organization);GO:0048715(negative regulation of oligodendrocyte differentiation);GO:0060828(regulation of canonical Wnt signaling pathway);GO:0090263(positive regulation of can…	04310(Wnt signaling pathway);04310(Wnt signaling pathway)	dishevelled associated activator of morphogenesis 2 [Source:NCBI gene;Acc:421422]	2.54364	1.81716	1.56469	4.98587	3.71576	3.1091	0.501704	-0.995091	0.0338922
MSTRG.9088	PRMT8	ENSGALT00000021680	GO:0005829(cytosol);GO:0005886(plasma membrane);GO:0006355(regulation of transcription, DNA-templated);GO:0006479(protein methylation);GO:0008168(methyltransferase activity);GO:0008469(histone-arginine N-methyltransferase activity);GO:0008757(S-adenosylmethionine-dependent methyltransferase activity);GO:0016571(histone methylation);GO:0016740(transferase activity);GO:0018216(peptidyl-arginine met…	NA	protein arginine methyltransferase 8 [Source:NCBI gene;Acc:425989]	3.68262	1.65777	4.41514	7.51614	6.45298	5.40927	0.503423	-0.990156	0.0333859
MSTRG.127735	ERCC6L2	ENSGALT00000080545;ENSGALT00000094953;ENSGALT00000020603;ENSGALT00000102394	GO:0005524(ATP binding);GO:0005524(ATP binding)	NA	excision repair cross-complementation group 6 like 2 [Source:NCBI gene;Acc:427469]	2.64221	1.73769	2.08898	4.53644	3.31486	4.9681	0.504617	-0.98674	0.0263944
MSTRG.66444	ORMDL3	ENSGALT00000045549	GO:0005783(endoplasmic reticulum);GO:0005789(endoplasmic reticulum membrane);GO:0006672(ceramide metabolic process);GO:0016020(membrane);GO:0016021(integral component of membrane);GO:0035339(SPOTS complex);GO:0090156(cellular sphingolipid homeostasis);GO:1900060(negative regulation of ceramide biosynthetic process)	NA	ORMDL sphingolipid biosynthesis regulator 3 [Source:NCBI gene;Acc:426131]	6.4046	4.81982	6.38047	12.6274	12.6736	9.54177	0.505267	-0.984881	0.0191878
MSTRG.15884	ENSGALG00000016702	ENSGALT00000026955	GO:0000159(protein phosphatase type 2A complex);GO:0005509(calcium ion binding);GO:0006470(protein dephosphorylation);GO:0019888(protein phosphatase regulator activity);GO:0043666(regulation of phosphoprotein phosphatase activity)	03015(mRNA surveillance pathway);04261(Adrenergic signaling in cardiomyocytes)	protein phosphatase 2 regulatory subunit B''beta [Source:NCBI gene;Acc:418670]	1.97369	1.61825	1.18388	2.52395	3.19501	3.71402	0.506289	-0.981967	0.0417077
MSTRG.2267	TRABD	ENSGALT00000088955;ENSGALT00000072540;ENSGALT00000063163;ENSGALT00000079557	NA	NA	TraB domain containing [Source:NCBI gene;Acc:417746]	11.9585	9.65415	4.37738	21.4665	9.52518	20.2322	0.507382	-0.978857	0.0402105
MSTRG.9357	ING4	ENSGALT00000061628;ENSGALT00000023343	GO:0000123(histone acetyltransferase complex);GO:0003713(transcription coactivator activity);GO:0005634(nucleus);GO:0005829(cytosol);GO:0006260(DNA replication);GO:0006325(chromatin organization);GO:0006473(protein acetylation);GO:0006915(apoptotic process);GO:0006978(DNA damage response, signal transduction by p53 class mediator resulting in transcription of p21 class mediator);GO:0007049(cell c…	NA	inhibitor of growth family member 4 [Source:NCBI gene;Acc:418281]	3.1207	3.37048	2.85745	5.06789	9.72325	3.62661	0.507588	-0.978269	0.0258878
MSTRG.82930	MARS2	ENSGALT00000006401	GO:0000166(nucleotide binding);GO:0004812(aminoacyl-tRNA ligase activity);GO:0004825(methionine-tRNA ligase activity);GO:0005524(ATP binding);GO:0005739(mitochondrion);GO:0005759(mitochondrial matrix);GO:0006412(translation);GO:0006418(tRNA aminoacylation for protein translation);GO:0006431(methionyl-tRNA aminoacylation);GO:0016874(ligase activity)	00450(Selenocompound metabolism);00970(Aminoacyl-tRNA biosynthesis)	methionyl-tRNA synthetase 2, mitochondrial [Source:NCBI gene;Acc:428689]	5.87873	4.87099	2.42681	9.28087	9.12519	7.55269	0.507595	-0.978251	0.0433297
MSTRG.2700	ST7	ENSGALT00000084844;ENSGALT00000074764;ENSGALT00000055784;ENSGALT00000051113	GO:0016020(membrane);GO:0016021(integral component of membrane);GO:0016021(integral component of membrane)	NA	suppression of tumorigenicity 7 [Source:NCBI gene;Acc:417770]	6.99426	3.54421	3.68559	11.1066	7.14258	9.7341	0.508307	-0.976229	0.0452976
MSTRG.17188	EFNB2	ENSGALT00000099013;ENSGALT00000043657	GO:0001945(lymph vessel development);GO:0002042(cell migration involved in sprouting angiogenesis);GO:0005102(signaling receptor binding);GO:0005886(plasma membrane);GO:0007155(cell adhesion);GO:0007411(axon guidance);GO:0008284(positive regulation of cell population proliferation);GO:0009887(animal organ morphogenesis);GO:0010839(negative regulation of keratinocyte proliferation);GO:0010977(nega…	NA	ephrin B2 [Source:NCBI gene;Acc:395625]	13.6259	6.90006	6.8202	15.9202	17.9429	19.9239	0.508415	-0.975921	0.0168334
MSTRG.66574	ENSGALG00000003162	ENSGALT00000107559;ENSGALT00000005002	GO:0010976(positive regulation of neuron projection development);GO:0016020(membrane);GO:0016021(integral component of membrane);GO:0016021(integral component of membrane)	NA	reticulophagy regulator family member 3 [Source:NCBI gene;Acc:772215]	11.6986	4.51898	8.50461	15.399	17.9627	15.0049	0.511141	-0.968206	0.0247765
MSTRG.96706	MICAL2	ENSGALT00000100707;ENSGALT00000008888;ENSGALT00000069078	GO:0003779(actin binding);GO:0005515(protein binding);GO:0005634(nucleus);GO:0010735(positive regulation of transcription via serum response element binding);GO:0030042(actin filament depolymerization);GO:0043914(NADPH:sulfur oxidoreductase activity);GO:0046872(metal ion binding);GO:0055114(oxidation-reduction process);GO:0071949(FAD binding);GO:0071949(FAD binding)	NA	microtubule associated monooxygenase, calponin and LIM domain containing 2 [Source:NCBI gene;Acc:423031]	6.84843	6.06157	4.95192	7.97135	9.33597	17.6186	0.511424	-0.967409	0.0186294
MSTRG.5316	FGD6	ENSGALT00000018508	GO:0005085(guanyl-nucleotide exchange factor activity);GO:0005089(Rho guanyl-nucleotide exchange factor activity);GO:0035023(regulation of Rho protein signal transduction);GO:0043087(regulation of GTPase activity);GO:0046872(metal ion binding)	NA	FYVE, RhoGEF and PH domain containing 6 [Source:NCBI gene;Acc:417908]	3.63629	3.34957	6.451	9.17305	6.61956	10.374	0.513511	-0.961533	0.0175695
MSTRG.92584	TBC1D1	ENSGALT00000051911;ENSGALT00000069912;ENSGALT00000079545	GO:0005096(GTPase activator activity);GO:0005515(protein binding);GO:0005623(cell);GO:0006886(intracellular protein transport);GO:0017137(Rab GTPase binding);GO:0090630(activation of GTPase activity);GO:0090630(activation of GTPase activity)	NA	TBC1 domain family member 1 [Source:NCBI gene;Acc:426162]	5.52452	5.2501	3.06769	7.11332	9.51975	10.2844	0.514251	-0.959457	0.0169895
MSTRG.108458	BLNK	ENSGALT00000011296;ENSGALT00000092062;ENSGALT00000103492;ENSGALT00000039674;ENSGALT00000100016	GO:0005070(SH3/SH2 adaptor activity);GO:0005515(protein binding);GO:0005737(cytoplasm);GO:0005829(cytosol);GO:0005886(plasma membrane);GO:0007169(transmembrane receptor protein tyrosine kinase signaling pathway);GO:0007202(activation of phospholipase C activity);GO:0009967(positive regulation of signal transduction);GO:0016020(membrane);GO:0030183(B cell differentiation);GO:0035556(intracellular …	NA	B cell linker [Source:NCBI gene;Acc:395733]	2.7734	2.25087	1.72865	3.68857	5.97717	3.44673	0.515	-0.957356	0.0344438
MSTRG.127054	ZFAND5	ENSGALT00000091223;ENSGALT00000024435;ENSGALT00000096831	GO:0003677(DNA binding);GO:0008270(zinc ion binding);GO:0046872(metal ion binding);GO:0046872(metal ion binding)	NA	zinc finger AN1-type containing 5 [Source:NCBI gene;Acc:427254]	20.1666	6.91422	8.85038	24.2959	26.8073	18.4743	0.516419	-0.953387	0.0454901
MSTRG.54622	B4GALT6	ENSGALT00000024447	GO:0001572(lactosylceramide biosynthetic process);GO:0005975(carbohydrate metabolic process);GO:0008378(galactosyltransferase activity);GO:0008489(UDP-galactose:glucosylceramide beta-1,4-galactosyltransferase activity);GO:0010706(ganglioside biosynthetic process via lactosylceramide);GO:0016020(membrane);GO:0016021(integral component of membrane);GO:0016757(transferase activity, transferring glyc…	00600(Sphingolipid metabolism)	beta-1,4-galactosyltransferase 6 [Source:NCBI gene;Acc:421092]	6.97193	3.51645	9.53673	10.8972	16.4282	11.2609	0.518969	-0.94628	0.0352664
MSTRG.45718	FZD1	ENSGALT00000014752	GO:0001934(positive regulation of protein phosphorylation);GO:0003149(membranous septum morphogenesis);GO:0003150(muscular septum morphogenesis);GO:0003151(outflow tract morphogenesis);GO:0004888(transmembrane signaling receptor activity);GO:0005102(signaling receptor binding);GO:0005109(frizzled binding);GO:0005515(protein binding);GO:0007166(cell surface receptor signaling pathway);GO:0007267(c…	04150(mTOR signaling pathway);04310(Wnt signaling pathway);04916(Melanogenesis)	frizzled class receptor 1 [Source:NCBI gene;Acc:374062]	26.503	11.4206	13.9351	34.6187	34.5706	30.6573	0.519383	-0.945129	0.024817
MSTRG.82434	CERS5	ENSGALT00000053181	GO:0003677(DNA binding);GO:0005634(nucleus);GO:0005783(endoplasmic reticulum);GO:0016020(membrane);GO:0016021(integral component of membrane);GO:0030148(sphingolipid biosynthetic process);GO:0046513(ceramide biosynthetic process);GO:0050291(sphingosine N-acyltransferase activity)	00600(Sphingolipid metabolism)	ceramide synthase 5 [Source:NCBI gene;Acc:426879]	16.6227	10.4337	6.27179	25.6371	16.8472	21.6608	0.519575	-0.944596	0.0384148
MSTRG.87736	CCSER1	ENSGALT00000016925;ENSGALT00000107643;ENSGALT00000105280;ENSGALT00000048311	NA	NA	coiled-coil serine rich protein 1 [Source:NCBI gene;Acc:422518]	2.04254	5.37103	2.55255	6.70779	6.0313	6.41715	0.520254	-0.942711	0.0316731
MSTRG.106514	SLC25A16	ENSGALT00000095069;ENSGALT00000006467	GO:0005739(mitochondrion);GO:0005743(mitochondrial inner membrane);GO:0016020(membrane);GO:0016021(integral component of membrane);GO:0022857(transmembrane transporter activity);GO:0055085(transmembrane transport);GO:0055085(transmembrane transport)	NA	solute carrier family 25 member 16 [Source:NCBI gene;Acc:423689]	6.58751	4.76463	9.58239	15.6699	12.8209	11.6314	0.521769	-0.938517	0.0399345
MSTRG.51348	RETREG1	ENSGALT00000091894;ENSGALT00000082493;ENSGALT00000105420;ENSGALT00000106594	GO:0005730(nucleolus);GO:0005783(endoplasmic reticulum);GO:0005801(cis-Golgi network);GO:0016020(membrane);GO:0016021(integral component of membrane);GO:0016604(nuclear body);GO:0019233(sensory perception of pain);GO:0030176(integral component of endoplasmic reticulum membrane);GO:0043524(negative regulation of neuron apoptotic process);GO:0061709(reticulophagy);GO:0061709(reticulophagy)	NA	family with sequence similarity 134 member B [Source:NCBI gene;Acc:100859798]	2.39395	3.12396	2.53856	5.1168	4.81777	5.36358	0.52663	-0.925138	0.0350402
MSTRG.42573	SMYD4	ENSGALT00000004795;ENSGALT00000098433	GO:0005515(protein binding);GO:0005515(protein binding)	NA	SET and MYND domain containing 4 [Source:NCBI gene;Acc:417562]	4.13961	2.76073	3.47935	6.87942	6.80744	6.01957	0.526716	-0.924902	0.0261646
MSTRG.76007	HSF2	ENSGALT00000051722;ENSGALT00000103348;ENSGALT00000072905	GO:0000790(nuclear chromatin);GO:0000977(RNA polymerase II regulatory region sequence-specific DNA binding);GO:0000978(RNA polymerase II proximal promoter sequence-specific DNA binding);GO:0001046(core promoter sequence-specific DNA binding);GO:0001162(RNA polymerase II intronic transcription regulatory region sequence-specific DNA binding);GO:0001228(DNA-binding transcription activator activity,…	NA	heat shock transcription factor 2 [Source:NCBI gene;Acc:421724]	8.10935	5.20603	3.00829	8.71419	11.6757	10.5467	0.527649	-0.922351	0.032206
MSTRG.72496	KIF26B	ENSGALT00000093800;ENSGALT00000017350;ENSGALT00000097056;ENSGALT00000106469	GO:0000166(nucleotide binding);GO:0003774(motor activity);GO:0003777(microtubule motor activity);GO:0005524(ATP binding);GO:0005871(kinesin complex);GO:0005874(microtubule);GO:0007018(microtubule-based movement);GO:0008017(microtubule binding);GO:0022409(positive regulation of cell-cell adhesion);GO:0030010(establishment of cell polarity);GO:0072092(ureteric bud invasion);GO:0072092(ureteric bud …	NA	kinesin family member 26B [Source:NCBI gene;Acc:100859813]	2.14388	2.11723	1.28564	3.71007	4.08978	2.70014	0.528263	-0.920671	0.0364034
MSTRG.58512	TRIB1	ENSGALT00000060923	GO:0004672(protein kinase activity);GO:0004860(protein kinase inhibitor activity);GO:0005524(ATP binding);GO:0005634(nucleus);GO:0005737(cytoplasm);GO:0006468(protein phosphorylation);GO:0006469(negative regulation of protein kinase activity);GO:0007254(JNK cascade);GO:0008134(transcription factor binding);GO:0014912(negative regulation of smooth muscle cell migration);GO:0031434(mitogen-activate…	NA	tribbles pseudokinase 1 [Source:NCBI gene;Acc:428386]	5.92861	4.7779	3.78662	10.9599	10.8297	5.63369	0.528497	-0.920034	0.0474211
MSTRG.80323	TRIB2	ENSGALT00000036892;ENSGALT00000099127	GO:0004672(protein kinase activity);GO:0005524(ATP binding);GO:0005634(nucleus);GO:0006468(protein phosphorylation);GO:0008134(transcription factor binding);GO:0031434(mitogen-activated protein kinase kinase binding);GO:0031625(ubiquitin protein ligase binding);GO:0032436(positive regulation of proteasomal ubiquitin-dependent protein catabolic process);GO:0043405(regulation of MAP kinase activity…	NA	tribbles pseudokinase 2 [Source:NCBI gene;Acc:378919]	11.6308	22.5235	16.7817	41.4167	18.1824	36.6828	0.529031	-0.918576	0.026361
MSTRG.47654	RBMS3	ENSGALT00000092189;ENSGALT00000037692	GO:0002357(defense response to tumor cell);GO:0003676(nucleic acid binding);GO:0003723(RNA binding);GO:0003730(mRNA 3'-UTR binding);GO:0005634(nucleus);GO:0005737(cytoplasm);GO:0005829(cytosol);GO:0008143(poly(A) binding);GO:0008266(poly(U) RNA binding);GO:0010628(positive regulation of gene expression);GO:0010629(negative regulation of gene expression);GO:0035925(mRNA 3'-UTR AU-rich region bindi…	NA	RNA binding motif single stranded interacting protein 3 [Source:NCBI gene;Acc:420661]	3.76577	2.59141	2.47127	6.44667	4.61226	5.61905	0.529348	-0.917712	0.0482154
MSTRG.67094	DAZAP1	ENSGALT00000060660;ENSGALT00000024525;ENSGALT00000089785	GO:0003676(nucleic acid binding);GO:0003723(RNA binding);GO:0003730(mRNA 3'-UTR binding);GO:0005634(nucleus);GO:0005654(nucleoplasm);GO:0005737(cytoplasm);GO:0005829(cytosol);GO:0007283(spermatogenesis);GO:0008266(poly(U) RNA binding);GO:0008283(cell population proliferation);GO:0032991(protein-containing complex);GO:0034046(poly(G) binding);GO:0035613(RNA stem-loop binding);GO:0048026(positive r…	03015(mRNA surveillance pathway);03015(mRNA surveillance pathway)	DAZ associated protein 1 [Source:NCBI gene;Acc:427266]	5.53694	3.22397	6.9645	11.5134	10.8628	7.32408	0.529469	-0.917381	0.0249447
MSTRG.38147	ENSGALG00000004928	ENSGALT00000007883	NA	04810(Regulation of actin cytoskeleton)	slingshot homolog 1 (Drosophila) [Source:NCBI gene;Acc:101750781]	3.80265	3.51508	1.8263	6.66463	5.32039	5.26994	0.529936	-0.916109	0.042359
MSTRG.90653	ARSJ	ENSGALT00000073907	GO:0003824(catalytic activity);GO:0008484(sulfuric ester hydrolase activity);GO:0016020(membrane);GO:0016021(integral component of membrane)	NA	arylsulfatase family member J [Source:NCBI gene;Acc:101751638]	6.67946	3.25478	6.38434	11.2456	10.1096	9.37323	0.531059	-0.913056	0.0257437
MSTRG.10671	NECTIN3	ENSGALT00000024797;ENSGALT00000094041	GO:0002089(lens morphogenesis in camera-type eye);GO:0005886(plasma membrane);GO:0005911(cell-cell junction);GO:0005913(cell-cell adherens junction);GO:0007155(cell adhesion);GO:0007156(homophilic cell adhesion via plasma membrane adhesion molecules);GO:0007157(heterophilic cell-cell adhesion via plasma membrane cell adhesion molecules);GO:0007286(spermatid development);GO:0009566(fertilization);…	04514(Cell adhesion molecules (CAMs));04520(Adherens junction);04520(Adherens junction)	nectin cell adhesion molecule 3 [Source:NCBI gene;Acc:418415]	6.02877	4.7355	5.65086	11.2412	11.0728	8.58519	0.531249	-0.91254	0.015422
MSTRG.21308	BIRC2	ENSGALT00000036426;ENSGALT00000083416;ENSGALT00000096544	GO:0005634(nucleus);GO:0005737(cytoplasm);GO:0006915(apoptotic process);GO:0016567(protein ubiquitination);GO:0042981(regulation of apoptotic process);GO:0043027(cysteine-type endopeptidase inhibitor activity involved in apoptotic process);GO:0060546(negative regulation of necroptotic process);GO:0061630(ubiquitin protein ligase activity);GO:1990001(inhibition of cysteine-type endopeptidase activ…	04120(Ubiquitin mediated proteolysis);04210(Apoptosis);04217(Necroptosis);04510(Focal adhesion);04621(NOD-like receptor signaling pathway);05168(Herpes simplex virus 1 infection);05168(Herpes simplex virus 1 infection)	baculoviral IAP repeat containing 2 [Source:NCBI gene;Acc:374012]	12.0106	9.97393	3.62852	15.2276	16.0101	16.9705	0.5313	-0.912402	0.0470848
MSTRG.61415	RNF114	ENSGALT00000013014	GO:0005829(cytosol);GO:0005886(plasma membrane);GO:0046872(metal ion binding)	NA	ring finger protein 114 [Source:NCBI gene;Acc:414881]	24.2605	16.4693	16.5882	37.0862	40.2143	30.4384	0.532009	-0.910478	0.0197561
MSTRG.63629	AGO4	ENSGALT00000071627;ENSGALT00000049753;ENSGALT00000066954	GO:0000932(P-body);GO:0003676(nucleic acid binding);GO:0003723(RNA binding);GO:0003725(double-stranded RNA binding);GO:0003727(single-stranded RNA binding);GO:0005515(protein binding);GO:0005634(nucleus);GO:0005654(nucleoplasm);GO:0005737(cytoplasm);GO:0005829(cytosol);GO:0006402(mRNA catabolic process);GO:0006417(regulation of translation);GO:0007130(synaptonemal complex assembly);GO:0007140(mal…	NA	argonaute 4, RISC catalytic component [Source:NCBI gene;Acc:419629]	4.0367	3.73214	5.18574	8.01305	8.32382	7.98648	0.532598	-0.90888	0.019717
MSTRG.108877	USMG5	ENSGALT00000099770;ENSGALT00000051809	GO:0005753(mitochondrial proton-transporting ATP synthase complex);GO:0016020(membrane);GO:0016021(integral component of membrane);GO:0016021(integral component of membrane)	NA	up-regulated during skeletal muscle growth 5 homolog (mouse) [Source:NCBI gene;Acc:423873]	10.1525	9.95986	5.53262	15.0242	16.8445	16.2253	0.533225	-0.907183	0.0447245
MSTRG.70803	BICRAL	ENSGALT00000016119	GO:0016514(SWI/SNF complex)	NA	BRD4 interacting chromatin remodeling complex associated protein like [Source:NCBI gene;Acc:428568]	2.61535	1.7726	3.33219	5.73682	5.39631	3.30336	0.534765	-0.903022	0.0447991
MSTRG.115651	ACVR1;gga-mir-6546	ENSGALT00000085664;ENSGALT00000082779;ENSGALT00000043297	GO:0000082(G1/S transition of mitotic cell cycle);GO:0000166(nucleotide binding);GO:0001569(branching involved in blood vessel morphogenesis);GO:0001702(gastrulation with mouth forming second);GO:0001707(mesoderm formation);GO:0001755(neural crest cell migration);GO:0002526(acute inflammatory response);GO:0003143(embryonic heart tube morphogenesis);GO:0003181(atrioventricular valve morphogenesis)…	04060(Cytokine-cytokine receptor interaction);04350(TGF-beta signaling pathway);04350(TGF-beta signaling pathway)	activin A receptor type 1 [Source:NCBI gene;Acc:395246];gga-mir-6546 [Source:miRBase;Acc:MI0022362]	8.26524	9.88128	6.39467	14.4324	15.4431	15.9032	0.536083	-0.899473	0.01851
MSTRG.71236	PPM1B	ENSGALT00000065710;ENSGALT00000062435	GO:0000287(magnesium ion binding);GO:0003824(catalytic activity);GO:0004721(phosphoprotein phosphatase activity);GO:0004722(protein serine/threonine phosphatase activity);GO:0004724(magnesium-dependent protein serine/threonine phosphatase activity);GO:0005634(nucleus);GO:0005829(cytosol);GO:0006470(protein dephosphorylation);GO:0016787(hydrolase activity);GO:0030145(manganese ion binding);GO:0043…	04010(MAPK signaling pathway);04010(MAPK signaling pathway)	protein phosphatase, Mg2+/Mn2+ dependent 1B [Source:NCBI gene;Acc:421404]	8.63516	6.66133	4.33504	10.515	13.3379	12.3754	0.541884	-0.883944	0.0246369
MSTRG.75086	PDE7B	ENSGALT00000108093;ENSGALT00000099496;ENSGALT00000022595;ENSGALT00000099762;ENSGALT00000092998	GO:0004114(3',5'-cyclic-nucleotide phosphodiesterase activity);GO:0004115(3',5'-cyclic-AMP phosphodiesterase activity);GO:0007165(signal transduction);GO:0008081(phosphoric diester hydrolase activity);GO:0016787(hydrolase activity);GO:0046872(metal ion binding);GO:0046872(metal ion binding)	00230(Purine metabolism);00230(Purine metabolism)	phosphodiesterase 7B [Source:NCBI gene;Acc:421692]	2.36519	2.89296	3.61072	6.44922	6.03883	3.83862	0.543214	-0.880408	0.036535
MSTRG.98055	CPT1A	ENSGALT00000011466	GO:0001676(long-chain fatty acid metabolic process);GO:0004095(carnitine O-palmitoyltransferase activity);GO:0005739(mitochondrion);GO:0009437(carnitine metabolic process);GO:0016020(membrane);GO:0016021(integral component of membrane);GO:0016740(transferase activity);GO:0016746(transferase activity, transferring acyl groups);GO:0030855(epithelial cell differentiation);GO:1990698(palmitoleoyltran…	00071(Fatty acid degradation);03320(PPAR signaling pathway);04920(Adipocytokine signaling pathway)	carnitine palmitoyltransferase 1A [Source:NCBI gene;Acc:423118]	4.58408	6.49761	6.02673	10.9837	9.49227	10.9373	0.544625	-0.876666	0.0265675
MSTRG.41937	MTMR4;gga-mir-1698-1	ENSGALT00000001556;ENSGALT00000107005;ENSGALT00000061248;ENSGALT00000101658;ENSGALT00000050561	GO:0004722(protein serine/threonine phosphatase activity);GO:0004725(protein tyrosine phosphatase activity);GO:0005768(endosome);GO:0006470(protein dephosphorylation);GO:0007179(transforming growth factor beta receptor signaling pathway);GO:0016311(dephosphorylation);GO:0016791(phosphatase activity);GO:0019903(protein phosphatase binding);GO:0035335(peptidyl-tyrosine dephosphorylation);GO:0046872…	00562(Inositol phosphate metabolism);04070(Phosphatidylinositol signaling system);04140(Autophagy - animal);04140(Autophagy - animal)	myotubularin related protein 4 [Source:NCBI gene;Acc:417472];gga-mir-1698-2 [Source:miRBase;Acc:MI0023552]	3.2764	3.474	3.37683	6.26618	3.56544	8.71526	0.546034	-0.872938	0.0442078
MSTRG.1481	CBLL1	ENSGALT00000083666;ENSGALT00000060943	GO:0004842(ubiquitin-protein transferase activity);GO:0005634(nucleus);GO:0005654(nucleoplasm);GO:0005737(cytoplasm);GO:0007162(negative regulation of cell adhesion);GO:0007275(multicellular organism development);GO:0016567(protein ubiquitination);GO:0016607(nuclear speck);GO:0016740(transferase activity);GO:0030335(positive regulation of cell migration);GO:0036396(RNA N6-methyladenosine methyltr…	NA	Cbl proto-oncogene like 1 [Source:NCBI gene;Acc:417701]	2.4253	4.97219	4.15925	8.22651	6.6646	6.15928	0.549003	-0.865113	0.0462225
MSTRG.18768	ENSGALG00000027514	ENSGALT00000045041	GO:0005737(cytoplasm);GO:0008544(epidermis development);GO:0009792(embryo development ending in birth or egg hatching);GO:0046872(metal ion binding)	NA	sciellin [Source:NCBI gene;Acc:101751260]	4.08246	3.40521	5.88313	5.53089	10.2728	8.49753	0.550212	-0.86194	0.0419431
MSTRG.6253	NUAK1	ENSGALT00000020668	GO:0001650(fibrillar center);GO:0002039(p53 binding);GO:0004672(protein kinase activity);GO:0004674(protein serine/threonine kinase activity);GO:0005524(ATP binding);GO:0005634(nucleus);GO:0005737(cytoplasm);GO:0006468(protein phosphorylation);GO:0015630(microtubule cytoskeleton);GO:0030155(regulation of cell adhesion);GO:0035507(regulation of myosin-light-chain-phosphatase activity);GO:0035556(i…	NA	NUAK family kinase 1 [Source:NCBI gene;Acc:418074]	41.3574	31.213	25.6174	57.5269	47.9998	72.3901	0.551875	-0.857587	0.0294549
MSTRG.110561	SLC40A1	ENSGALT00000052782;ENSGALT00000096993;ENSGALT00000098001	GO:0002260(lymphocyte homeostasis);GO:0003158(endothelium development);GO:0005381(iron ion transmembrane transporter activity);GO:0005654(nucleoplasm);GO:0005829(cytosol);GO:0005886(plasma membrane);GO:0006811(ion transport);GO:0006826(iron ion transport);GO:0006879(cellular iron ion homeostasis);GO:0008021(synaptic vesicle);GO:0015093(ferrous iron transmembrane transporter activity);GO:0016020(m…	04216(Ferroptosis);04216(Ferroptosis)	solute carrier family 40 member 1 [Source:NCBI gene;Acc:423984]	3.27685	2.84525	2.13032	5.13355	5.81411	3.99066	0.552433	-0.856129	0.0493648
MSTRG.67233	SMIM7	ENSGALT00000070802	GO:0016020(membrane);GO:0016021(integral component of membrane)	NA	small integral membrane protein 7 [Source:NCBI gene;Acc:420141]	19.0319	18.9726	24.2248	41.7689	37.8886	32.831	0.553207	-0.85411	0.0292127
MSTRG.124113	UBAP1	ENSGALT00000034499	GO:0000813(ESCRT I complex);GO:0005515(protein binding);GO:0005737(cytoplasm);GO:0005794(Golgi apparatus);GO:0005829(cytosol);GO:0005886(plasma membrane);GO:0043130(ubiquitin binding);GO:0043162(ubiquitin-dependent protein catabolic process via the multivesicular body sorting pathway)	NA	ubiquitin associated protein 1 [Source:NCBI gene;Acc:431652]	6.37562	7.7797	9.21975	19.5927	10.7255	11.9095	0.553547	-0.853222	0.0377609
MSTRG.19557	ENSGALG00000040808;ENSGALG00000032808	ENSGALT00000060588;ENSGALT00000049953	GO:0004596(peptide alpha-N-acetyltransferase activity);GO:0005515(protein binding);GO:0005737(cytoplasm);GO:0017196(N-terminal peptidyl-methionine acetylation);GO:0031415(NatA complex);GO:0031415(NatA complex)	NA	N(alpha)-acetyltransferase 16, NatA auxiliary subunit [Source:NCBI gene;Acc:418832]	5.8306	4.57645	5.80252	9.56085	10.4879	9.2016	0.554166	-0.851611	0.0189052
MSTRG.98187	CCND1	ENSGALT00000012217	GO:0000082(G1/S transition of mitotic cell cycle);GO:0000122(negative regulation of transcription by RNA polymerase II);GO:0000307(cyclin-dependent protein kinase holoenzyme complex);GO:0000320(re-entry into mitotic cell cycle);GO:0001934(positive regulation of protein phosphorylation);GO:0003714(transcription corepressor activity);GO:0004672(protein kinase activity);GO:0005634(nucleus);GO:000565…	04068(FoxO signaling pathway);04110(Cell cycle);04115(p53 signaling pathway);04218(Cellular senescence);04310(Wnt signaling pathway);04340(Hedgehog signaling pathway);04371(Apelin signaling pathway);04510(Focal adhesion);04530(Tight junction);04933(AGE-RAGE signaling pathway in diabetic complications)	cyclin D1 [Source:NCBI gene;Acc:396341]	15.8624	14.9297	11.4204	18.4323	32.626	25.0911	0.554339	-0.85116	0.0255058
MSTRG.68494	RAB1A	ENSGALT00000083942;ENSGALT00000071042	GO:0000045(autophagosome assembly);GO:0000139(Golgi membrane);GO:0003924(GTPase activity);GO:0005525(GTP binding);GO:0005794(Golgi apparatus);GO:0006888(endoplasmic reticulum to Golgi vesicle-mediated transport);GO:0006897(endocytosis);GO:0006914(autophagy);GO:0007030(Golgi organization);GO:0016020(membrane);GO:0016477(cell migration);GO:0019068(virion assembly);GO:0030252(growth hormone secretio…	NA	RAB1A, member RAS oncogene family [Source:NCBI gene;Acc:421273]	52.5179	22.8426	25.0679	57.998	67.5869	55.4469	0.554755	-0.850077	0.0437272
MSTRG.50191	NUP153	ENSGALT00000063073	GO:0005643(nuclear pore);GO:0005730(nucleolus);GO:0005829(cytosol);GO:0006606(protein import into nucleus);GO:0008139(nuclear localization sequence binding);GO:0017056(structural constituent of nuclear pore);GO:0031965(nuclear membrane);GO:0034399(nuclear periphery);GO:0042405(nuclear inclusion body);GO:0042802(identical protein binding);GO:0043495(protein membrane anchor);GO:0044613(nuclear pore…	03013(RNA transport)	nucleoporin 153 [Source:NCBI gene;Acc:420848]	13.3073	12.1031	6.59464	20.5608	19.2851	17.6921	0.556242	-0.846215	0.0313332
MSTRG.41642	ENSGALG00000047043	ENSGALT00000105119	NA	NA	dynein axonemal heavy chain 17 [Source:NCBI gene;Acc:768861]	1.76198	1.57653	2.52454	4.36498	3.31807	2.85372	0.556437	-0.845709	0.032997
MSTRG.5317	VEZT	ENSGALT00000094372;ENSGALT00000018529	GO:0005654(nucleoplasm);GO:0005829(cytosol);GO:0017022(myosin binding);GO:0098609(cell-cell adhesion);GO:0098609(cell-cell adhesion)	NA	vezatin, adherens junctions transmembrane protein [Source:NCBI gene;Acc:417911]	8.01185	5.90751	8.3823	12.9206	16.2483	10.8186	0.557717	-0.842395	0.0224504
MSTRG.15391	SHROOM2	ENSGALT00000071858;ENSGALT00000056079	GO:0003779(actin binding);GO:0005515(protein binding);GO:0005623(cell);GO:0005912(adherens junction);GO:0007015(actin filament organization);GO:0016324(apical plasma membrane);GO:0030036(actin cytoskeleton organization);GO:0030864(cortical actin cytoskeleton);GO:0032401(establishment of melanosome localization);GO:0043296(apical junction complex);GO:0045176(apical protein localization);GO:0051015…	NA	shroom family member 2 [Source:NCBI gene;Acc:418651]	4.92884	4.64648	4.22909	7.31413	8.02114	9.37412	0.55867	-0.839931	0.0271849
MSTRG.52017	GRB10	ENSGALT00000077268;ENSGALT00000099951;ENSGALT00000095632;ENSGALT00000021387	GO:0005070(SH3/SH2 adaptor activity);GO:0005158(insulin receptor binding);GO:0007165(signal transduction);GO:0009967(positive regulation of signal transduction);GO:0030178(negative regulation of Wnt signaling pathway);GO:0042326(negative regulation of phosphorylation);GO:0046325(negative regulation of glucose import);GO:0046627(negative regulation of insulin receptor signaling pathway);GO:0048009…	04150(mTOR signaling pathway);04150(mTOR signaling pathway)	growth factor receptor bound protein 10 [Source:NCBI gene;Acc:420948]	2.98003	2.78137	3.08661	6.13834	4.92795	4.75806	0.559139	-0.838721	0.0482144
MSTRG.26615	CYLD	ENSGALT00000016123;ENSGALT00000093355	GO:0004843(thiol-dependent ubiquitin-specific protease activity);GO:0005813(centrosome);GO:0005819(spindle);GO:0005829(cytosol);GO:0005881(cytoplasmic microtubule);GO:0006511(ubiquitin-dependent protein catabolic process);GO:0007346(regulation of mitotic cell cycle);GO:0008270(zinc ion binding);GO:0010803(regulation of tumor necrosis factor-mediated signaling pathway);GO:0016579(protein deubiquit…	04217(Necroptosis);04622(RIG-I-like receptor signaling pathway);04625(C-type lectin receptor signaling pathway);04625(C-type lectin receptor signaling pathway)	CYLD lysine 63 deubiquitinase [Source:NCBI gene;Acc:415725]	3.6134	3.04123	3.974	6.74449	5.91643	6.25986	0.561744	-0.832016	0.0450153
MSTRG.93752	ZNF518B	ENSGALT00000024121	GO:0003676(nucleic acid binding);GO:0005634(nucleus)	NA	zinc finger protein 518B [Source:NCBI gene;Acc:422841]	10.2356	8.41297	5.68619	15.1031	15.376	12.6519	0.564206	-0.825706	0.0379376
MSTRG.124906	ENSGALG00000014721	ENSGALT00000058578;ENSGALT00000079603;ENSGALT00000023743	GO:0000122(negative regulation of transcription by RNA polymerase II);GO:0001103(RNA polymerase II repressing transcription factor binding);GO:0003677(DNA binding);GO:0003714(transcription corepressor activity);GO:0005634(nucleus);GO:0005654(nucleoplasm);GO:0042826(histone deacetylase binding);GO:0042826(histone deacetylase binding)	NA	MIER family member 3 [Source:NCBI gene;Acc:427146]	5.53559	3.44587	5.33119	8.78036	9.7939	6.70809	0.566113	-0.820839	0.0497772
MSTRG.15396	CLCN4;WWC3	ENSGALT00000026803;ENSGALT00000075289;ENSGALT00000074297	GO:0005247(voltage-gated chloride channel activity);GO:0005254(chloride channel activity);GO:0005768(endosome);GO:0005769(early endosome);GO:0005789(endoplasmic reticulum membrane);GO:0005794(Golgi apparatus);GO:0005886(plasma membrane);GO:0005887(integral component of plasma membrane);GO:0006811(ion transport);GO:0006821(chloride transport);GO:0015297(antiporter activity);GO:0015299(solute:proto…	NA	chloride voltage-gated channel 4 [Source:NCBI gene;Acc:428005];WWC family member 3 [Source:NCBI gene;Acc:418649]	5.24607	4.80579	5.23745	9.15497	9.86936	7.97258	0.566336	-0.820271	0.0206042
MSTRG.38242	TPST2;TFIP11	ENSGALT00000009027;ENSGALT00000072151;ENSGALT00000009022	GO:0005783(endoplasmic reticulum);GO:0005794(Golgi apparatus);GO:0006478(peptidyl-tyrosine sulfation);GO:0008476(protein-tyrosine sulfotransferase activity);GO:0016740(transferase activity);GO:0042803(protein homodimerization activity);GO:0000390(spliceosomal complex disassembly);GO:0000784(nuclear chromosome, telomeric region);GO:0003676(nucleic acid binding);GO:0005634(nucleus);GO:0005681(splic…	NA	tyrosylprotein sulfotransferase 2 [Source:NCBI gene;Acc:416910];tuftelin interacting protein 11 [Source:NCBI gene;Acc:416909]	5.98207	5.44954	4.17118	8.87748	8.1429	10.5018	0.566917	-0.818791	0.037807
MSTRG.124578	ENSGALG00000048563;ENSGALG00000003747	ENSGALT00000100832;ENSGALT00000005943	GO:0005515(protein binding);GO:0004896(cytokine receptor activity);GO:0004924(oncostatin-M receptor activity);GO:0005900(oncostatin-M receptor complex);GO:0008284(positive regulation of cell population proliferation);GO:0009897(external side of plasma membrane);GO:0016020(membrane);GO:0016021(integral component of membrane);GO:0019221(cytokine-mediated signaling pathway);GO:0019955(cytokine bindi…	04060(Cytokine-cytokine receptor interaction)	oncostatin M receptor [Source:NCBI gene;Acc:427446]	4.21329	4.61737	5.22719	8.56283	8.62379	7.58453	0.567509	-0.817285	0.0322426
MSTRG.59546	SAMHD1	ENSGALT00000001868	GO:0000166(nucleotide binding);GO:0000724(double-strand break repair via homologous recombination);GO:0002376(immune system process);GO:0003676(nucleic acid binding);GO:0003697(single-stranded DNA binding);GO:0003723(RNA binding);GO:0003824(catalytic activity);GO:0005525(GTP binding);GO:0005634(nucleus);GO:0005654(nucleoplasm);GO:0005694(chromosome);GO:0005886(plasma membrane);GO:0006203(dGTP cat…	NA	SAM and HD domain containing deoxynucleoside triphosphate triphosphohydrolase 1 [Source:NCBI gene;Acc:419125]	6.23461	5.17542	3.89613	9.49703	9.12483	8.31542	0.568215	-0.815492	0.0466993
MSTRG.128351	ENSGALG00000000264	ENSGALT00000091428;ENSGALT00000000344;ENSGALT00000104402	GO:0004842(ubiquitin-protein transferase activity);GO:0005737(cytoplasm);GO:0010738(regulation of protein kinase A signaling);GO:0016567(protein ubiquitination);GO:0035329(hippo signaling);GO:0046872(metal ion binding);GO:0061630(ubiquitin protein ligase activity);GO:0061630(ubiquitin protein ligase activity)	NA	praja ring finger ubiquitin ligase 1 [Source:NCBI gene;Acc:415612]	2.6229	3.14882	3.57434	5.38544	6.12366	4.8945	0.569757	-0.811582	0.0416225
MSTRG.19914	KPNA3	ENSGALT00000027475	GO:0005515(protein binding);GO:0005634(nucleus);GO:0005737(cytoplasm);GO:0006606(protein import into nucleus);GO:0008022(protein C-terminus binding);GO:0008565(protein transporter activity);GO:0015031(protein transport);GO:0061608(nuclear import signal receptor activity)	NA	karyopherin subunit alpha 3 [Source:NCBI gene;Acc:418870]	8.08704	9.56547	11.0416	12.2156	20.0213	17.9788	0.571417	-0.807384	0.0296384
MSTRG.63290	YTHDF2	ENSGALT00000073836;ENSGALT00000068522;ENSGALT00000046999	GO:0000932(P-body);GO:0001556(oocyte maturation);GO:0003723(RNA binding);GO:0005634(nucleus);GO:0005737(cytoplasm);GO:0005815(microtubule organizing center);GO:0005829(cytosol);GO:0036464(cytoplasmic ribonucleoprotein granule);GO:0043488(regulation of mRNA stability);GO:0061157(mRNA destabilization);GO:1903538(regulation of meiotic cell cycle process involved in oocyte maturation);GO:1903679(posi…	NA	YTH domain family, member 2 [Source:NCBI gene;Acc:419583]	6.84515	7.16841	6.61686	12.3606	9.49425	14.1994	0.572206	-0.805393	0.0478157
MSTRG.103910	HIF1A	ENSGALT00000093485;ENSGALT00000019364	GO:0000981(DNA-binding transcription factor activity, RNA polymerase II-specific);GO:0001228(DNA-binding transcription activator activity, RNA polymerase II-specific);GO:0001525(angiogenesis);GO:0001568(blood vessel development);GO:0001666(response to hypoxia);GO:0001755(neural crest cell migration);GO:0001837(epithelial to mesenchymal transition);GO:0001922(B-1 B cell homeostasis);GO:0001944(vas…	04137(Mitophagy - animal);04140(Autophagy - animal);04140(Autophagy - animal)	hypoxia inducible factor 1 subunit alpha [Source:NCBI gene;Acc:374177]	20.9663	13.4509	16.4253	34.7594	35.4463	18.6171	0.572404	-0.804894	0.0421001
MSTRG.117361	SASS6	ENSGALT00000008503	GO:0005813(centrosome);GO:0005814(centriole);GO:0005815(microtubule organizing center);GO:0005829(cytosol);GO:0007099(centriole replication);GO:0051298(centrosome duplication);GO:0098536(deuterosome)	NA	SAS-6 centriolar assembly protein [Source:NCBI gene;Acc:424471]	7.61985	4.87928	6.12791	11.7326	10.197	10.5593	0.573336	-0.802548	0.0370733
MSTRG.22042	PICALM	ENSGALT00000060042	GO:0000149(SNARE binding);GO:0005543(phospholipid binding);GO:0005545(1-phosphatidylinositol binding);GO:0005546(phosphatidylinositol-4,5-bisphosphate binding);GO:0005634(nucleus);GO:0005769(early endosome);GO:0005886(plasma membrane);GO:0005905(clathrin-coated pit);GO:0006897(endocytosis);GO:0006898(receptor-mediated endocytosis);GO:0006900(vesicle budding from membrane);GO:0007409(axonogenesis)…	NA	phosphatidylinositol binding clathrin assembly protein [Source:NCBI gene;Acc:425991]	15.4006	9.34263	18.3555	26.2792	23.8383	24.7014	0.57604	-0.79576	0.0437401
MSTRG.72947	KCNK1	ENSGALT00000017920	GO:0005242(inward rectifier potassium channel activity);GO:0005267(potassium channel activity);GO:0005272(sodium channel activity);GO:0005768(endosome);GO:0005887(integral component of plasma membrane);GO:0006811(ion transport);GO:0006813(potassium ion transport);GO:0016020(membrane);GO:0016021(integral component of membrane);GO:0022841(potassium ion leak channel activity);GO:0030322(stabilizatio…	NA	potassium two pore domain channel subfamily K member 7 [Source:NCBI gene;Acc:421519]	18.0852	11.988	17.158	26.9595	27.0432	27.9172	0.576552	-0.794478	0.0415784
MSTRG.42801	ULK2	ENSGALT00000007525	GO:0000045(autophagosome assembly);GO:0000407(phagophore assembly site);GO:0004672(protein kinase activity);GO:0004674(protein serine/threonine kinase activity);GO:0005524(ATP binding);GO:0005829(cytosol);GO:0006468(protein phosphorylation);GO:0006914(autophagy);GO:0010506(regulation of autophagy);GO:0016020(membrane);GO:0034045(phagophore assembly site membrane);GO:0042594(response to starvation…	04136(Autophagy - other);04140(Autophagy - animal);04150(mTOR signaling pathway)	unc-51 like autophagy activating kinase 2 [Source:NCBI gene;Acc:417614]	6.5903	5.88522	4.06725	9.27345	9.57032	9.41951	0.58531	-0.772728	0.0433186
MSTRG.23574	ADAM10	ENSGALT00000006698	GO:0004175(endopeptidase activity);GO:0004222(metalloendopeptidase activity);GO:0005634(nucleus);GO:0005737(cytoplasm);GO:0005794(Golgi apparatus);GO:0005798(Golgi-associated vesicle);GO:0006468(protein phosphorylation);GO:0006508(proteolysis);GO:0006509(membrane protein ectodomain proteolysis);GO:0007162(negative regulation of cell adhesion);GO:0007219(Notch signaling pathway);GO:0008237(metallo…	NA	ADAM metallopeptidase domain 10 [Source:NCBI gene;Acc:374113]	8.6238	8.89697	6.10096	14.3232	15.2525	10.5394	0.588849	-0.764032	0.0393434
MSTRG.115102	ENSGALG00000046969;ENSGALG00000012207	ENSGALT00000096706;ENSGALT00000019931;ENSGALT00000100758	GO:0006351(transcription, DNA-templated);GO:0000079(regulation of cyclin-dependent protein serine/threonine kinase activity);GO:0005634(nucleus);GO:0006357(regulation of transcription by RNA polymerase II);GO:0008024(cyclin/CDK positive transcription elongation factor complex);GO:0016538(cyclin-dependent protein serine/threonine kinase regulator activity);GO:0032786(positive regulation of DNA-tem…	NA	cyclin T2 [Source:NCBI gene;Acc:424289]	5.03967	3.98238	6.15782	8.18296	9.64832	7.92799	0.589298	-0.762932	0.0397333
MSTRG.124905	MAP3K1	ENSGALT00000104375;ENSGALT00000023732;ENSGALT00000052933	GO:0004672(protein kinase activity);GO:0004674(protein serine/threonine kinase activity);GO:0005524(ATP binding);GO:0005737(cytoplasm);GO:0006468(protein phosphorylation);GO:0008270(zinc ion binding);GO:0019901(protein kinase binding);GO:0023014(signal transduction by protein phosphorylation);GO:0031098(stress-activated protein kinase signaling cascade);GO:0032147(activation of protein kinase act…	04010(MAPK signaling pathway);04120(Ubiquitin mediated proteolysis);04530(Tight junction);04622(RIG-I-like receptor signaling pathway);04912(GnRH signaling pathway);04912(GnRH signaling pathway)	mitogen-activated protein kinase kinase kinase 1 [Source:NCBI gene;Acc:427144]	7.7752	6.14153	6.53151	11.0663	11.2591	12.3514	0.58968	-0.761996	0.0495827
MSTRG.33546	RUFY1	ENSGALT00000071618;ENSGALT00000106612	GO:0005634(nucleus);GO:0005737(cytoplasm);GO:0005768(endosome);GO:0005829(cytosol);GO:0008565(protein transporter activity);GO:0015031(protein transport);GO:0016607(nuclear speck);GO:0017124(SH3 domain binding);GO:0030100(regulation of endocytosis);GO:0042169(SH2 domain binding);GO:0043231(intracellular membrane-bounded organelle);GO:0046872(metal ion binding);GO:0046872(metal ion binding)	04144(Endocytosis);04144(Endocytosis)	RUN and FYVE domain containing 1 [Source:NCBI gene;Acc:426519]	6.21355	6.8404	5.19196	11.1256	11.7411	7.96072	0.591872	-0.756642	0.0491802
MSTRG.35842	ENSGALG00000043765	ENSGALT00000054833;ENSGALT00000096417;ENSGALT00000075459;ENSGALT00000097676	GO:0004842(ubiquitin-protein transferase activity);GO:0005515(protein binding);GO:0005829(cytosol);GO:0016567(protein ubiquitination);GO:0046872(metal ion binding);GO:0046872(metal ion binding)	NA	unkempt family like zinc finger [Source:NCBI gene;Acc:416593]	3.88952	3.49533	3.86362	5.36219	7.12932	6.40414	0.595294	-0.748325	0.0434614
MSTRG.41191	ZNF207	ENSGALT00000085796;ENSGALT00000005471;ENSGALT00000046245;ENSGALT00000066237;ENSGALT00000089530;ENSGALT00000060193	GO:0000070(mitotic sister chromatid segregation);GO:0000776(kinetochore);GO:0003676(nucleic acid binding);GO:0005634(nucleus);GO:0005654(nucleoplasm);GO:0005730(nucleolus);GO:0007094(mitotic spindle assembly checkpoint);GO:0008017(microtubule binding);GO:0008201(heparin binding);GO:0008608(attachment of spindle microtubules to kinetochore);GO:0050821(protein stabilization);GO:0051983(regulation o…	NA	zinc finger protein 207 [Source:NCBI gene;Acc:417413]	7.64446	6.46054	6.77094	11.9213	11.9438	10.8143	0.601969	-0.73224	0.0396134
MSTRG.65835	C26H6orf106	ENSGALT00000074053	GO:0000407(phagophore assembly site);GO:0005515(protein binding);GO:0005776(autophagosome);GO:0016236(macroautophagy);GO:0043130(ubiquitin binding)	NA	chromosome 26 C6orf106 homolog [Source:NCBI gene;Acc:419902]	14.0541	10.3026	12.6695	22.1188	19.2498	20.0696	0.602657	-0.73059	0.0454272
MSTRG.55864	ARFGEF1	ENSGALT00000079624	GO:0000139(Golgi membrane);GO:0005085(guanyl-nucleotide exchange factor activity);GO:0005086(ARF guanyl-nucleotide exchange factor activity);GO:0005654(nucleoplasm);GO:0005730(nucleolus);GO:0005794(Golgi apparatus);GO:0005802(trans-Golgi network);GO:0005829(cytosol);GO:0007030(Golgi organization);GO:0010256(endomembrane system organization);GO:0016192(vesicle-mediated transport);GO:0017022(myosin…	04144(Endocytosis)	ADP ribosylation factor guanine nucleotide exchange factor 1 [Source:NCBI gene;Acc:420170]	8.48365	6.71532	6.81776	12.2341	12.3928	11.5921	0.607878	-0.718146	0.0460153
MSTRG.29369	BICD2	ENSGALT00000093843;ENSGALT00000104080;ENSGALT00000008433	GO:0005635(nuclear envelope);GO:0005642(annulate lamellae);GO:0005643(nuclear pore);GO:0005737(cytoplasm);GO:0005794(Golgi apparatus);GO:0005813(centrosome);GO:0005829(cytosol);GO:0005886(plasma membrane);GO:0006890(retrograde vesicle-mediated transport, Golgi to endoplasmic reticulum);GO:0007018(microtubule-based movement);GO:0008093(cytoskeletal adaptor activity);GO:0017137(Rab GTPase binding);…	NA	BICD cargo adaptor 2 [Source:NCBI gene;Acc:415990]	16.7819	13.19	17.7644	23.8518	28.9892	25.3923	0.610179	-0.712695	0.0489843
MSTRG.68990	JAG1	ENSGALT00000014678	GO:0001953(negative regulation of cell-matrix adhesion);GO:0001974(blood vessel remodeling);GO:0002011(morphogenesis of an epithelial sheet);GO:0002456(T cell mediated immunity);GO:0003184(pulmonary valve morphogenesis);GO:0003215(cardiac right ventricle morphogenesis);GO:0005112(Notch binding);GO:0005509(calcium ion binding);GO:0005515(protein binding);GO:0005543(phospholipid binding);GO:0005886…	04330(Notch signaling pathway);04371(Apelin signaling pathway)	jagged 1 [Source:NCBI gene;Acc:396043]	16.3461	15.6805	17.5034	27.4444	24.7961	27.9048	0.618002	-0.694317	0.0492918

## Sheet: NonDEGs
gene_id	gene_name	transcript_id	GO	KEGG	Description	FPKM.DMOG1	FPKM.DMOG2	FPKM.DMOG3	FPKM.Control1	FPKM.Control2	FPKM.Control3	fc	log2(fc)	pval
MSTRG.42790	NLE1	ENSGALT00000007475	GO:0000027(ribosomal large subunit assembly);GO:0001756(somitogenesis);GO:0001822(kidney development);GO:0005515(protein binding);GO:0005634(nucleus);GO:0005730(nucleolus);GO:0007219(Notch signaling pathway);GO:0042273(ribosomal large subunit biogenesis);GO:0045930(negative regulation of mitotic cell cycle);GO:0048705(skeletal system morphogenesis);GO:0061484(hematopoietic stem cell homeostasis);…	NA	notchless homolog 1 [Source:NCBI gene;Acc:417613]	3.24058	3.95426	3.73939	6.13063	6.68641	7.15933	0.547359	-0.869442	0.0502011
MSTRG.15860	GTPBP6	ENSGALT00000096491;ENSGALT00000026979	GO:0005525(GTP binding);GO:0005737(cytoplasm);GO:0043022(ribosome binding);GO:0043022(ribosome binding)	NA	GTP binding protein 6 (putative) [Source:NCBI gene;Acc:418672]	1.96958	0.987761	2.59152	3.83716	4.0551	3.98108	0.467338	-1.09746	0.0502324
MSTRG.98041	ENSGALG00000020486	ENSGALT00000093931;ENSGALT00000038931	GO:0006629(lipid metabolic process);GO:0016020(membrane);GO:0016021(integral component of membrane);GO:0016491(oxidoreductase activity);GO:0055114(oxidation-reduction process);GO:0055114(oxidation-reduction process)	01040(Biosynthesis of unsaturated fatty acids);01040(Biosynthesis of unsaturated fatty acids)	fatty acid desaturase 1-like 2 [Source:NCBI gene;Acc:423119]	0.0001	0.0001	0.0001	0.998748	0.963046	0.0001	0.000152913	-12.675	0.050483
MSTRG.66584	EZH1	ENSGALT00000081887;ENSGALT00000004844	GO:0005515(protein binding);GO:0005654(nucleoplasm);GO:0018024(histone-lysine N-methyltransferase activity);GO:0035098(ESC/E(Z) complex);GO:0070734(histone H3-K27 methylation);GO:0070734(histone H3-K27 methylation)	00310(Lysine degradation);00310(Lysine degradation)	enhancer of zeste 1 polycomb repressive complex 2 subunit [Source:NCBI gene;Acc:420023]	1.48458	3.33422	1.98706	3.87346	4.14412	5.15023	0.516856	-0.952165	0.0505182
MSTRG.91169	PPP3CA	ENSGALT00000107973;ENSGALT00000079486	GO:0000082(G1/S transition of mitotic cell cycle);GO:0004721(phosphoprotein phosphatase activity);GO:0004722(protein serine/threonine phosphatase activity);GO:0005516(calmodulin binding);GO:0005634(nucleus);GO:0005654(nucleoplasm);GO:0005737(cytoplasm);GO:0005739(mitochondrion);GO:0005829(cytosol);GO:0005955(calcineurin complex);GO:0006470(protein dephosphorylation);GO:0006606(protein import into…	04010(MAPK signaling pathway);04020(Calcium signaling pathway);04114(Oocyte meiosis);04218(Cellular senescence);04310(Wnt signaling pathway);04370(VEGF signaling pathway);04625(C-type lectin receptor signaling pathway);04625(C-type lectin receptor signaling pathway)	protein phosphatase 3, catalytic subunit, alpha isozyme [Source:NCBI gene;Acc:395113]	1.24573	0.0001	0.390587	3.24708	2.73128	2.56662	0.191507	-2.38453	0.0506046
MSTRG.83137	BRCC3	ENSGALT00000008648	GO:0000151(ubiquitin ligase complex);GO:0000152(nuclear ubiquitin ligase complex);GO:0004843(thiol-dependent ubiquitin-specific protease activity);GO:0005515(protein binding);GO:0005634(nucleus);GO:0005654(nucleoplasm);GO:0005737(cytoplasm);GO:0006281(DNA repair);GO:0006302(double-strand break repair);GO:0008237(metallopeptidase activity);GO:0010165(response to X-ray);GO:0010212(response to ioniz…	03440(Homologous recombination);04621(NOD-like receptor signaling pathway)	BRCA1/BRCA2-containing complex subunit 3 [Source:NCBI gene;Acc:422201]	2.84086	2.84802	3.66396	4.79515	6.13436	7.55097	0.506093	-0.982526	0.0507565
MSTRG.5770	SLC25A17	ENSGALT00000019602	GO:0005347(ATP transmembrane transporter activity);GO:0005777(peroxisome);GO:0005778(peroxisomal membrane);GO:0005779(integral component of peroxisomal membrane);GO:0006635(fatty acid beta-oxidation);GO:0015217(ADP transmembrane transporter activity);GO:0015228(coenzyme A transmembrane transporter activity);GO:0015230(FAD transmembrane transporter activity);GO:0015866(ADP transport);GO:0015867(AT…	04146(Peroxisome)	solute carrier family 25 member 17 [Source:NCBI gene;Acc:418004]	29.4005	34.5634	27.625	17.3468	17.2673	19.8309	1.68223	0.750372	0.0509023
ENSGALG00000013112	RERGL	ENSGALT00000021403	GO:0003924(GTPase activity);GO:0005525(GTP binding);GO:0007165(signal transduction);GO:0016020(membrane)	NA	RERG like [Source:NCBI gene;Acc:418180]	0.0001	0.0001	0.0001	0.408791	0.366337	0.290811	0.000281442	-11.7949	0.0509789
MSTRG.4792	TMTC2	ENSGALT00000017879;ENSGALT00000059912;ENSGALT00000052535;ENSGALT00000060372	GO:0000030(mannosyltransferase activity);GO:0005515(protein binding);GO:0005783(endoplasmic reticulum);GO:0005789(endoplasmic reticulum membrane);GO:0006493(protein O-linked glycosylation);GO:0016020(membrane);GO:0016021(integral component of membrane);GO:0035269(protein O-linked mannosylation);GO:0055074(calcium ion homeostasis);GO:0097502(mannosylation);GO:0097502(mannosylation)	NA	transmembrane and tetratricopeptide repeat containing 2 [Source:NCBI gene;Acc:417880]	8.33239	6.91556	5.2987	11.5728	13.0277	11.4547	0.569866	-0.811305	0.0511175
MSTRG.85943	ENSGALG00000009272	ENSGALT00000015084	GO:0046247(terpene catabolic process)	NA	uncharacterized LOC100857197 [Source:NCBI gene;Acc:100857197]	1.6505	0.984189	1.4889	2.60337	3.40594	2.94851	0.460334	-1.11925	0.0511758
MSTRG.16967	ENSGALG00000051334	ENSGALT00000095596;ENSGALT00000091644	NA	NA		0.972287	1.03606	0.379123	2.85791	3.47731	1.31911	0.311911	-1.68079	0.0511859
MSTRG.85060	GAB3	ENSGALT00000013696	GO:0030225(macrophage differentiation)	NA	GRB2 associated binding protein 3 [Source:NCBI gene;Acc:428717]	0.0001	0.0001	0.0001	0.046747	0.497141	1.16462	0.000175591	-12.4755	0.0512652
MSTRG.49937	DEK	ENSGALT00000096895;ENSGALT00000020695;ENSGALT00000096450	GO:0005634(nucleus);GO:0042393(histone binding);GO:0043292(contractile fiber);GO:2000779(regulation of double-strand break repair);GO:2001032(regulation of double-strand break repair via nonhomologous end joining);GO:2001032(regulation of double-strand break repair via nonhomologous end joining)	NA	DEK proto-oncogene [Source:NCBI gene;Acc:420828]	20.1352	5.45667	5.92937	3.9554	6.06786	5.56449	2.02218	1.01591	0.0513014
MSTRG.36864	DNAJA3	ENSGALT00000073893;ENSGALT00000096935;ENSGALT00000012696	GO:0000122(negative regulation of transcription by RNA polymerase II);GO:0005524(ATP binding);GO:0005634(nucleus);GO:0005739(mitochondrion);GO:0005759(mitochondrial matrix);GO:0005829(cytosol);GO:0005884(actin filament);GO:0006264(mitochondrial DNA replication);GO:0006457(protein folding);GO:0006915(apoptotic process);GO:0006924(activation-induced cell death of T cells);GO:0007005(mitochondrion o…	NA	DnaJ heat shock protein family (Hsp40) member A3 [Source:NCBI gene;Acc:416671]	7.86395	4.78841	3.10858	10.1599	9.21227	10.1201	0.534409	-0.903983	0.051349
MSTRG.90029	FAT4	ENSGALT00000019298;ENSGALT00000093152	GO:0001658(branching involved in ureteric bud morphogenesis);GO:0001822(kidney development);GO:0003007(heart morphogenesis);GO:0005509(calcium ion binding);GO:0005886(plasma membrane);GO:0007009(plasma membrane organization);GO:0007155(cell adhesion);GO:0007156(homophilic cell adhesion via plasma membrane adhesion molecules);GO:0007157(heterophilic cell-cell adhesion via plasma membrane cell adhe…	NA	FAT atypical cadherin 4 [Source:NCBI gene;Acc:395166]	1.97046	1.95557	0.792646	3.56433	2.53997	2.69126	0.536483	-0.898394	0.0513546
MSTRG.166	STRIP2	ENSGALT00000050083;ENSGALT00000075048	GO:0005737(cytoplasm);GO:0005829(cytosol);GO:0007010(cytoskeleton organization);GO:0008360(regulation of cell shape);GO:0016477(cell migration);GO:0016477(cell migration)	NA	striatin interacting protein 2 [Source:NCBI gene;Acc:416676]	0.0001	0.0001	0.0001	0.411128	0.106283	0.442272	0.000312603	-11.6434	0.0516963
MSTRG.74437	MTRF1L;FBXO5	ENSGALT00000022140;ENSGALT00000022138	GO:0003747(translation release factor activity);GO:0005739(mitochondrion);GO:0006415(translational termination);GO:0016149(translation release factor activity, codon specific);GO:0043022(ribosome binding);GO:0070126(mitochondrial translational termination);GO:0001556(oocyte maturation);GO:0005515(protein binding);GO:0005634(nucleus);GO:0005654(nucleoplasm);GO:0005737(cytoplasm);GO:0005819(spindle…	04114(Oocyte meiosis)	mitochondrial translational release factor 1 like [Source:NCBI gene;Acc:421643];F-box protein 5 [Source:NCBI gene;Acc:421642]	2.8318	2.91572	2.32268	5.30505	5.5355	3.83354	0.549963	-0.862593	0.0518534
MSTRG.92465	KLHL5	ENSGALT00000068370	GO:0005515(protein binding)	NA	kelch like family member 5 [Source:NCBI gene;Acc:425121]	11.2229	10.9666	12.3841	6.64721	4.96026	8.6721	1.70485	0.769645	0.0519595
MSTRG.62127	DNAJC16	ENSGALT00000061536	GO:0005623(cell);GO:0016020(membrane);GO:0016021(integral component of membrane);GO:0045454(cell redox homeostasis)	NA	DnaJ heat shock protein family (Hsp40) member C16 [Source:NCBI gene;Acc:429208]	6.51435	7.04029	4.98066	11.7753	11.0926	8.84459	0.584479	-0.774777	0.0523533
MSTRG.129758	PTBP3	ENSGALT00000102461;ENSGALT00000101274;ENSGALT00000096651;ENSGALT00000025267	GO:0003676(nucleic acid binding);GO:0003723(RNA binding);GO:0005634(nucleus);GO:0006397(mRNA processing);GO:0033119(negative regulation of RNA splicing);GO:0033119(negative regulation of RNA splicing)	NA	polypyrimidine tract binding protein 3 [Source:NCBI gene;Acc:427333]	4.56866	3.45424	4.50501	6.6664	9.52877	6.45677	0.553061	-0.854489	0.0528079
MSTRG.16425	SOWAHC	ENSGALT00000045618	GO:0005515(protein binding)	NA	sosondowah ankyrin repeat domain family member C [Source:NCBI gene;Acc:428016]	24.0257	23.5842	6.42131	34.8247	38.1475	29.9058	0.525197	-0.929071	0.0531117
MSTRG.98795	TP53I11	ENSGALT00000030003	GO:0016020(membrane);GO:0016021(integral component of membrane)	NA	tumor protein p53 inducible protein 11 [Source:NCBI gene;Acc:426399]	11.8833	14.6022	5.45922	3.92461	3.87116	6.69155	2.20501	1.14079	0.0531203
MSTRG.31581	TMEM173	ENSGALT00000071854	GO:0002218(activation of innate immune response);GO:0002230(positive regulation of defense response to virus by host);GO:0005737(cytoplasm);GO:0005777(peroxisome);GO:0005783(endoplasmic reticulum);GO:0005789(endoplasmic reticulum membrane);GO:0005794(Golgi apparatus);GO:0010468(regulation of gene expression);GO:0016020(membrane);GO:0016021(integral component of membrane);GO:0031323(regulation of …	04621(NOD-like receptor signaling pathway);04622(RIG-I-like receptor signaling pathway);04623(Cytosolic DNA-sensing pathway);05168(Herpes simplex virus 1 infection)	transmembrane protein 173 [Source:NCBI gene;Acc:768990]	0.0001	0.0001	0.0001	0.582876	0.668064	0.165997	0.000211724	-12.2055	0.0531308
MSTRG.33749	FBXL21	ENSGALT00000070150;ENSGALT00000010230	GO:0005515(protein binding);GO:0005634(nucleus);GO:0005829(cytosol);GO:0016567(protein ubiquitination);GO:0019005(SCF ubiquitin ligase complex);GO:0031146(SCF-dependent proteasomal ubiquitin-dependent protein catabolic process);GO:0043153(entrainment of circadian clock by photoperiod);GO:0061630(ubiquitin protein ligase activity);GO:0061630(ubiquitin protein ligase activity)	NA	F-box and leucine rich repeat protein 21 [Source:NCBI gene;Acc:416306]	1.11052	2.30007	5.25107	4.3438	6.89314	6.56921	0.486442	-1.03966	0.0532098
MSTRG.4957	KITLG	ENSGALT00000018268;ENSGALT00000044248	GO:0001755(neural crest cell migration);GO:0002687(positive regulation of leukocyte migration);GO:0002763(positive regulation of myeloid leukocyte differentiation);GO:0005125(cytokine activity);GO:0005173(stem cell factor receptor binding);GO:0005576(extracellular region);GO:0005615(extracellular space);GO:0005737(cytoplasm);GO:0005856(cytoskeleton);GO:0005886(plasma membrane);GO:0007155(cell adh…	04010(MAPK signaling pathway);04916(Melanogenesis);04916(Melanogenesis)	KIT ligand [Source:NCBI gene;Acc:396028]	4.52508	0.0001	1.17807	8.45002	10.2604	8.17193	0.212156	-2.2368	0.0534737
MSTRG.6110	TIMP3	ENSGALT00000046125	GO:0002020(protease binding);GO:0004857(enzyme inhibitor activity);GO:0005515(protein binding);GO:0005576(extracellular region);GO:0005604(basement membrane);GO:0005615(extracellular space);GO:0008191(metalloendopeptidase inhibitor activity);GO:0008270(zinc ion binding);GO:0009725(response to hormone);GO:0010033(response to organic substance);GO:0010466(negative regulation of peptidase activity);…	NA	TIMP metallopeptidase inhibitor 3 [Source:NCBI gene;Acc:396483]	5.92834	3.9929	4.64856	6.29284	6.79279	20.0143	0.440176	-1.18385	0.0535002
MSTRG.117500	SLC44A3	ENSGALT00000094121;ENSGALT00000009004;ENSGALT00000057501;ENSGALT00000098435;ENSGALT00000099987	GO:0016020(membrane);GO:0016021(integral component of membrane);GO:0016021(integral component of membrane)	NA	solute carrier family 44 member 3 [Source:NCBI gene;Acc:424486]	9.23033	12.4569	8.66225	7.24966	5.37259	5.76264	1.65078	0.723149	0.0537901
MSTRG.39845	FIBCD1	ENSGALT00000006154	GO:0008061(chitin binding);GO:0016020(membrane)	NA	fibrinogen C domain containing 1 [Source:NCBI gene;Acc:427762]	0.0001	0.0001	0.0001	0.613306	0.373394	0.556373	0.000194417	-12.3286	0.0538714
MSTRG.132	RF00004	ENSGALT00000094382;ENSGALT00000092780	NA	NA		11691.9	23472.4	22733	13135.3	8329.06	13113.8	1.67439	0.743633	0.0541158
MSTRG.98379	ENSGALG00000052396	ENSGALT00000102854	GO:0005515(protein binding)	NA		3.95245	3.7234	2.82735	6.43455	7.34609	4.41778	0.577149	-0.792984	0.0542613
MSTRG.114725	DBI	ENSGALT00000019785	GO:0000062(fatty-acyl-CoA binding);GO:0036042(long-chain fatty acyl-CoA binding);GO:0036151(phosphatidylcholine acyl-chain remodeling);GO:0046983(protein dimerization activity)	03320(PPAR signaling pathway)	diazepam binding inhibitor, acyl-CoA binding protein [Source:NCBI gene;Acc:395263]	109.736	84.4995	105.312	63.1379	75.5017	13.9339	1.9633	0.973284	0.0545647
MSTRG.116646	ENSGALG00000049588	ENSGALT00000103873;ENSGALT00000105987;ENSGALT00000094438	GO:0003676(nucleic acid binding);GO:0003676(nucleic acid binding)	NA	zinc finger protein 648 [Source:NCBI gene;Acc:770891]	2.03632	0.687189	0.919996	2.10533	1.27298	6.45776	0.370423	-1.43275	0.054599
MSTRG.97697	DUSP8	ENSGALT00000010751	GO:0000188(inactivation of MAPK activity);GO:0004725(protein tyrosine phosphatase activity);GO:0005737(cytoplasm);GO:0005829(cytosol);GO:0006470(protein dephosphorylation);GO:0008138(protein tyrosine/serine/threonine phosphatase activity);GO:0016311(dephosphorylation);GO:0016787(hydrolase activity);GO:0016791(phosphatase activity);GO:0017017(MAP kinase tyrosine/serine/threonine phosphatase activi…	04010(MAPK signaling pathway)	dual specificity phosphatase 8 [Source:NCBI gene;Acc:770435]	7.84561	8.09416	6.56745	12.1003	11.1377	15.1399	0.586463	-0.769887	0.054647
MSTRG.119643	ARHGEF4	ENSGALT00000106273;ENSGALT00000101466;ENSGALT00000096522;ENSGALT00000104476;ENSGALT00000003431	GO:0005085(guanyl-nucleotide exchange factor activity);GO:0005089(Rho guanyl-nucleotide exchange factor activity);GO:0005515(protein binding);GO:0019904(protein domain specific binding);GO:0030032(lamellipodium assembly);GO:0030676(Rac guanyl-nucleotide exchange factor activity);GO:0035023(regulation of Rho protein signal transduction);GO:0035556(intracellular signal transduction);GO:0046847(filo…	NA	Rho guanine nucleotide exchange factor 4 [Source:HGNC Symbol;Acc:HGNC:684]	36.6424	34.4069	15.5062	11.7562	13.8213	23.186	1.775	0.827822	0.0546637
MSTRG.122850	WWTR1	ENSGALT00000016952	GO:0000122(negative regulation of transcription by RNA polymerase II);GO:0001649(osteoblast differentiation);GO:0001894(tissue homeostasis);GO:0001933(negative regulation of protein phosphorylation);GO:0003015(heart process);GO:0003713(transcription coactivator activity);GO:0003714(transcription corepressor activity);GO:0005515(protein binding);GO:0005634(nucleus);GO:0005654(nucleoplasm);GO:00056…	NA	WW domain containing transcription regulator 1 [Source:NCBI gene;Acc:100859902]	7.14967	1.39099	3.46958	0.0001	1.02633	1.05549	5.76882	2.52828	0.0547413
MSTRG.53519	DOK6	ENSGALT00000022344;ENSGALT00000073029	NA	NA	docking protein 6 [Source:NCBI gene;Acc:421025]	5.4222	7.87874	5.79147	11.3321	9.73442	11.8423	0.580161	-0.785475	0.0547563
MSTRG.65400	RBBP5	ENSGALT00000000943	GO:0005515(protein binding);GO:0005634(nucleus);GO:0005730(nucleolus);GO:0006974(cellular response to DNA damage stimulus);GO:0035064(methylated histone binding);GO:0035097(histone methyltransferase complex);GO:0042800(histone methyltransferase activity (H3-K4 specific));GO:0043627(response to estrogen);GO:0044212(transcription regulatory region DNA binding);GO:0044666(MLL3/4 complex);GO:0048188(…	NA	RB binding protein 5, histone lysine methyltransferase complex subunit [Source:NCBI gene;Acc:419826]	5.88985	5.57899	6.60223	8.08587	9.27231	13.6261	0.583234	-0.777853	0.0547685
MSTRG.126127	gga-mir-6669	ENSGALT00000043125	NA	NA	gga-mir-6669 [Source:miRBase;Acc:MI0022489]	0.528024	0.425455	0.0001	5.45689	3.24781	1.11612	0.0970977	-3.36442	0.0547876
MSTRG.109833	ATE1	ENSGALT00000033012;ENSGALT00000102940	GO:0004057(arginyltransferase activity);GO:0005634(nucleus);GO:0005737(cytoplasm);GO:0010498(proteasomal protein catabolic process);GO:0016598(protein arginylation);GO:0016740(transferase activity);GO:0016746(transferase activity, transferring acyl groups);GO:0016746(transferase activity, transferring acyl groups)	NA	arginyltransferase 1 [Source:NCBI gene;Acc:423936]	3.38666	3.29773	6.00348	7.62004	9.80816	5.16206	0.561653	-0.83225	0.0547989
MSTRG.50841	C5orf22	ENSGALT00000021053	NA	NA	chromosome 2 open reading frame, human C5orf22 [Source:NCBI gene;Acc:420910]	2.9099	2.44737	1.24671	7.23126	4.55971	3.89115	0.421115	-1.24771	0.0548971
MSTRG.99402	EHD4	ENSGALT00000014555;ENSGALT00000096413	GO:0005509(calcium ion binding);GO:0005515(protein binding);GO:0005525(GTP binding);GO:0005783(endoplasmic reticulum);GO:0032456(endocytic recycling);GO:0048471(perinuclear region of cytoplasm);GO:0051260(protein homooligomerization);GO:0055038(recycling endosome membrane);GO:0055038(recycling endosome membrane)	04144(Endocytosis);04144(Endocytosis)	EH domain containing 4 [Source:NCBI gene;Acc:100859860]	6.72974	22.713	21.5483	29.1948	32.3759	29.5109	0.559839	-0.836916	0.0553367
MSTRG.83154	ENSGALG00000030064	ENSGALT00000073845	GO:0003729(mRNA binding);GO:0006406(mRNA export from nucleus);GO:0016607(nuclear speck)	NA	forty-two-three domain containing 1-like [Source:NCBI gene;Acc:422221]	7.61989	6.22148	5.1104	3.72755	2.45183	4.34025	1.80156	0.849248	0.0554648
MSTRG.5321	HAL	ENSGALT00000038284;ENSGALT00000103495	GO:0003824(catalytic activity);GO:0004397(histidine ammonia-lyase activity);GO:0005737(cytoplasm);GO:0006547(histidine metabolic process);GO:0006548(histidine catabolic process);GO:0016829(lyase activity);GO:0016841(ammonia-lyase activity);GO:0019556(histidine catabolic process to glutamate and formamide);GO:0019557(histidine catabolic process to glutamate and formate);GO:0019557(histidine catabo…	00340(Histidine metabolism);00340(Histidine metabolism)	histidine ammonia-lyase [Source:NCBI gene;Acc:378924]	0.092751	0.356049	0.0001	1.39226	1.40257	0.732567	0.127261	-2.97414	0.0554947
MSTRG.129988	APTX	ENSGALT00000003023	GO:0000012(single strand break repair);GO:0000785(chromatin);GO:0000790(nuclear chromatin);GO:0003676(nucleic acid binding);GO:0003677(DNA binding);GO:0003682(chromatin binding);GO:0003684(damaged DNA binding);GO:0003690(double-stranded DNA binding);GO:0003725(double-stranded RNA binding);GO:0003824(catalytic activity);GO:0005515(protein binding);GO:0005634(nucleus);GO:0005654(nucleoplasm);GO:000…	NA	aprataxin [Source:NCBI gene;Acc:395173]	0.266029	0.465103	0.116524	2.23126	1.32635	1.69436	0.161398	-2.63131	0.0556336
MSTRG.6541	HIPK2	ENSGALT00000098874;ENSGALT00000020873	GO:0000122(negative regulation of transcription by RNA polymerase II);GO:0001102(RNA polymerase II activating transcription factor binding);GO:0001934(positive regulation of protein phosphorylation);GO:0003713(transcription coactivator activity);GO:0003714(transcription corepressor activity);GO:0004672(protein kinase activity);GO:0004674(protein serine/threonine kinase activity);GO:0005524(ATP bi…	04218(Cellular senescence);04218(Cellular senescence)	homeodomain interacting protein kinase 2 [Source:NCBI gene;Acc:374138]	14.3477	17.3802	12.0752	15.4174	24.9922	34.4736	0.584952	-0.77361	0.0557257
MSTRG.67008	RNF126	ENSGALT00000062295;ENSGALT00000090004	GO:0005154(epidermal growth factor receptor binding);GO:0005634(nucleus);GO:0005654(nucleoplasm);GO:0005737(cytoplasm);GO:0005829(cytosol);GO:0006511(ubiquitin-dependent protein catabolic process);GO:0006513(protein monoubiquitination);GO:0016567(protein ubiquitination);GO:0042059(negative regulation of epidermal growth factor receptor signaling pathway);GO:0042127(regulation of cell population p…	NA	ring finger protein 126 [Source:NCBI gene;Acc:420085]	6.75249	7.45676	7.23661	13.4211	11.5876	10.4276	0.605195	-0.724529	0.0562476
MSTRG.22748	ADPGK	ENSGALT00000002757	GO:0005783(endoplasmic reticulum);GO:0005975(carbohydrate metabolic process);GO:0006006(glucose metabolic process);GO:0016310(phosphorylation);GO:0016773(phosphotransferase activity, alcohol group as acceptor);GO:0043843(ADP-specific glucokinase activity)	00010(Glycolysis / Gluconeogenesis)	ADP dependent glucokinase [Source:NCBI gene;Acc:415317]	1.00972	2.63866	2.128	3.20924	8.44131	1.59845	0.435986	-1.19765	0.0563187
MSTRG.24553	ENSGALG00000006750	ENSGALT00000010909	NA	04120(Ubiquitin mediated proteolysis)	DET1, COP1 ubiquitin ligase partner [Source:NCBI gene;Acc:415497]	3.89956	3.07094	3.60583	9.82626	4.7127	6.59024	0.500556	-0.998398	0.056483
MSTRG.66573	PSMC3IP	ENSGALT00000046721;ENSGALT00000084345;ENSGALT00000082948	GO:0005654(nucleoplasm);GO:0007131(reciprocal meiotic recombination);GO:0030374(nuclear receptor transcription coactivator activity);GO:1903508(positive regulation of nucleic acid-templated transcription);GO:1903508(positive regulation of nucleic acid-templated transcription)	NA	PSMC3 interacting protein [Source:NCBI gene;Acc:772119]	2.51604	5.30828	7.53481	1.05947	3.9411	0.89488	2.60525	1.38142	0.0565521
MSTRG.66393	PCGF2	ENSGALT00000094502;ENSGALT00000040184	GO:0000122(negative regulation of transcription by RNA polymerase II);GO:0006342(chromatin silencing);GO:0035102(PRC1 complex);GO:0036353(histone H2A-K119 monoubiquitination);GO:1990841(promoter-specific chromatin binding);GO:1990841(promoter-specific chromatin binding)	NA	polycomb group ring finger 2 [Source:NCBI gene;Acc:425919]	0.0001	0.0001	0.0001	0.543795	0.0001	0.305381	0.000353242	-11.4671	0.056642
MSTRG.61710	PLCH2	ENSGALT00000001830	GO:0004435(phosphatidylinositol phospholipase C activity);GO:0004629(phospholipase C activity);GO:0005509(calcium ion binding);GO:0005886(plasma membrane);GO:0006629(lipid metabolic process);GO:0007165(signal transduction);GO:0008081(phosphoric diester hydrolase activity);GO:0016042(lipid catabolic process);GO:0016787(hydrolase activity);GO:0032959(inositol trisphosphate biosynthetic process);GO:…	00562(Inositol phosphate metabolism)	phospholipase C eta 2 [Source:NCBI gene;Acc:428180]	2.91777	1.32413	2.82352	5.69843	3.49382	3.975	0.53659	-0.898107	0.056814
MSTRG.22629	ZNF592	ENSGALT00000052673	GO:0003676(nucleic acid binding)	NA	zinc finger protein 592 [Source:NCBI gene;Acc:415335]	1.59132	3.9754	2.45512	5.19	4.62011	4.6634	0.554243	-0.851409	0.0568391
MSTRG.101152	RPS6KL1	ENSGALT00000095427;ENSGALT00000100227;ENSGALT00000016749	GO:0004672(protein kinase activity);GO:0005524(ATP binding);GO:0006468(protein phosphorylation);GO:0006468(protein phosphorylation)	NA	ribosomal protein S6 kinase like 1 [Source:NCBI gene;Acc:423358]	3.00992	5.28679	3.04801	1.68958	1.33103	2.47344	2.06491	1.04608	0.0568947
MSTRG.82174	HIF3A	ENSGALT00000098096;ENSGALT00000100999	GO:0001666(response to hypoxia);GO:0003677(DNA binding);GO:0003700(DNA-binding transcription factor activity);GO:0005654(nucleoplasm);GO:0005829(cytosol);GO:0005886(plasma membrane);GO:0006355(regulation of transcription, DNA-templated);GO:0006366(transcription by RNA polymerase II);GO:0046983(protein dimerization activity);GO:0046983(protein dimerization activity)	NA	neuronal PAS domain protein 1 [Source:NCBI gene;Acc:107049602]	2.45082	2.36371	0.0001	0.468181	0.124995	0.186632	6.17413	2.62624	0.0570231
MSTRG.88963	PAQR3	ENSGALT00000017695	GO:0001933(negative regulation of protein phosphorylation);GO:0005794(Golgi apparatus);GO:0010977(negative regulation of neuron projection development);GO:0016020(membrane);GO:0016021(integral component of membrane);GO:0033137(negative regulation of peptidyl-serine phosphorylation);GO:0034067(protein localization to Golgi apparatus);GO:0038023(signaling receptor activity);GO:0043407(negative regu…	NA	progestin and adipoQ receptor family member 3 [Source:NCBI gene;Acc:770386]	6.88271	3.41571	5.16851	10.4764	8.84071	8.74357	0.551195	-0.859364	0.057179
MSTRG.121370	TP63	ENSGALT00000100672;ENSGALT00000087959;ENSGALT00000091356;ENSGALT00000033346;ENSGALT00000098126	GO:0000122(negative regulation of transcription by RNA polymerase II);GO:0000790(nuclear chromatin);GO:0001228(DNA-binding transcription activator activity, RNA polymerase II-specific);GO:0001501(skeletal system development);GO:0001736(establishment of planar polarity);GO:0001738(morphogenesis of a polarized epithelium);GO:0002039(p53 binding);GO:0002064(epithelial cell development);GO:0003677(DN…	NA	tumor protein p63 [Source:NCBI gene;Acc:374269]	2.06193	2.46788	0.812861	0.977745	0.38866	0.868902	2.39013	1.25709	0.0572384
MSTRG.108898	COL17A1	ENSGALT00000059091;ENSGALT00000073791;ENSGALT00000098625;ENSGALT00000085211	GO:0005201(extracellular matrix structural constituent);GO:0005576(extracellular region);GO:0005581(collagen trimer);GO:0005604(basement membrane);GO:0005615(extracellular space);GO:0016020(membrane);GO:0016021(integral component of membrane);GO:0030054(cell junction);GO:0030056(hemidesmosome);GO:0030198(extracellular matrix organization);GO:0031012(extracellular matrix);GO:0031581(hemidesmosome …	NA	collagen type XVII alpha 1 chain [Source:NCBI gene;Acc:396503]	0.590498	0.570796	0.639785	1.61639	1.15738	1.1957	0.453733	-1.14009	0.0578106
MSTRG.43616	MAPKKK3L	ENSGALT00000009457	GO:0004672(protein kinase activity);GO:0005515(protein binding);GO:0005524(ATP binding);GO:0006468(protein phosphorylation)	04010(MAPK signaling pathway);04912(GnRH signaling pathway)	mitogen-activated protein kinase kinase kinase 3-like [Source:NCBI gene;Acc:420419]	4.17533	4.96568	3.18901	6.40531	5.2568	10.6478	0.552669	-0.855511	0.058088
MSTRG.29851	TPRA1	ENSGALT00000071694;ENSGALT00000009740	GO:0016020(membrane);GO:0016021(integral component of membrane);GO:0040016(embryonic cleavage);GO:1901991(negative regulation of mitotic cell cycle phase transition);GO:1901991(negative regulation of mitotic cell cycle phase transition)	NA	transmembrane protein adipocyte associated 1 [Source:NCBI gene;Acc:416028]	7.12615	4.77031	4.76323	15.2242	5.87597	9.36965	0.54676	-0.87102	0.0581456
MSTRG.85013	NXT2	ENSGALT00000013134	GO:0005634(nucleus);GO:0005654(nucleoplasm);GO:0005737(cytoplasm);GO:0005829(cytosol);GO:0006606(protein import into nucleus);GO:0006913(nucleocytoplasmic transport);GO:0008565(protein transporter activity);GO:0015031(protein transport);GO:0044613(nuclear pore central transport channel);GO:0048471(perinuclear region of cytoplasm);GO:0051028(mRNA transport)	03008(Ribosome biogenesis in eukaryotes);03013(RNA transport);03015(mRNA surveillance pathway);05164(Influenza A)	nuclear transport factor 2 like export factor 2 [Source:NCBI gene;Acc:422346]	13.9814	7.56777	8.93999	18.3761	16.7968	16.9672	0.584754	-0.774097	0.0583093
MSTRG.16443	RASA3	ENSGALT00000027149	GO:0005096(GTPase activator activity);GO:0007165(signal transduction);GO:0015278(calcium-release channel activity);GO:0031235(intrinsic component of the cytoplasmic side of the plasma membrane);GO:0035556(intracellular signal transduction);GO:0043087(regulation of GTPase activity);GO:0043547(positive regulation of GTPase activity);GO:0046580(negative regulation of Ras protein signal transduction)…	NA	RAS p21 protein activator 3 [Source:NCBI gene;Acc:418736]	5.32876	4.01062	4.941	8.31847	7.71404	8.3693	0.585218	-0.772954	0.0583922
MSTRG.16218	RNF149	ENSGALT00000056863;ENSGALT00000027090	GO:0016020(membrane);GO:0016021(integral component of membrane);GO:0016567(protein ubiquitination);GO:0031647(regulation of protein stability);GO:0035690(cellular response to drug);GO:0043409(negative regulation of MAPK cascade);GO:0061630(ubiquitin protein ligase activity);GO:0061630(ubiquitin protein ligase activity)	NA	ring finger protein 149 [Source:NCBI gene;Acc:418712]	8.8191	7.03323	4.10908	6.22773	16.5314	14.7278	0.532491	-0.909172	0.0584398
MSTRG.32885	SIMC1	ENSGALT00000071332;ENSGALT00000005337;ENSGALT00000061660	GO:0032184(SUMO polymer binding);GO:0032184(SUMO polymer binding)	NA	SUMO interacting motifs containing 1 [Source:NCBI gene;Acc:416231]	0.217111	0.68501	0.0001	1.9055	1.28612	1.80068	0.180722	-2.46815	0.0586484
MSTRG.62801	GPAT4	ENSGALT00000091083;ENSGALT00000102043;ENSGALT00000005561;ENSGALT00000092811	GO:0002071(glandular epithelial cell maturation);GO:0004366(glycerol-3-phosphate O-acyltransferase activity);GO:0005783(endoplasmic reticulum);GO:0006631(fatty acid metabolic process);GO:0006637(acyl-CoA metabolic process);GO:0006641(triglyceride metabolic process);GO:0006656(phosphatidylcholine biosynthetic process);GO:0007595(lactation);GO:0008610(lipid biosynthetic process);GO:0016020(membrane…	00561(Glycerolipid metabolism);00564(Glycerophospholipid metabolism);00564(Glycerophospholipid metabolism)	glycerol-3-phosphate acyltransferase 4 [Source:NCBI gene;Acc:426788]	3.61282	3.52328	2.81658	5.56887	5.58766	6.31165	0.56976	-0.811573	0.0588003
MSTRG.39857	ABL1	ENSGALT00000006164	GO:0000166(nucleotide binding);GO:0000287(magnesium ion binding);GO:0000400(four-way junction DNA binding);GO:0000405(bubble DNA binding);GO:0001784(phosphotyrosine residue binding);GO:0001843(neural tube closure);GO:0001922(B-1 B cell homeostasis);GO:0001934(positive regulation of protein phosphorylation);GO:0002322(B cell proliferation involved in immune response);GO:0002333(transitional one st…	04012(ErbB signaling pathway);04110(Cell cycle)	ABL proto-oncogene 1, non-receptor tyrosine kinase [Source:NCBI gene;Acc:417181]	19.982	8.23821	15.2819	24.1773	22.9814	27.159	0.585354	-0.772619	0.058914
MSTRG.1168	SEMA3C	ENSGALT00000061136;ENSGALT00000101757	GO:0001755(neural crest cell migration);GO:0001756(somitogenesis);GO:0001974(blood vessel remodeling);GO:0003148(outflow tract septum morphogenesis);GO:0003151(outflow tract morphogenesis);GO:0003215(cardiac right ventricle morphogenesis);GO:0003350(pulmonary myocardium development);GO:0005515(protein binding);GO:0005615(extracellular space);GO:0005887(integral component of plasma membrane);GO:00…	NA	semaphorin 3C [Source:NCBI gene;Acc:374090]	6.62834	5.06279	5.80852	9.52566	8.23675	12.4066	0.580054	-0.78574	0.0590672
MSTRG.87933	LEF1	ENSGALT00000054579;ENSGALT00000107351;ENSGALT00000091791	GO:0000122(negative regulation of transcription by RNA polymerase II);GO:0000977(RNA polymerase II regulatory region sequence-specific DNA binding);GO:0000978(RNA polymerase II proximal promoter sequence-specific DNA binding);GO:0000981(DNA-binding transcription factor activity, RNA polymerase II-specific);GO:0001228(DNA-binding transcription activator activity, RNA polymerase II-specific);GO:000…	04310(Wnt signaling pathway);04520(Adherens junction);04916(Melanogenesis);04916(Melanogenesis)	lymphoid enhancer binding factor 1 [Source:NCBI gene;Acc:395865]	1.3394	0.781662	1.16241	2.75348	2.13864	2.3622	0.452624	-1.14362	0.0590699
MSTRG.38407	ENSGALG00000006430	ENSGALT00000010381	GO:0003712(transcription coregulator activity);GO:0005634(nucleus);GO:0006357(regulation of transcription by RNA polymerase II);GO:0016592(mediator complex)	NA		3.0472	2.33902	2.69202	4.22971	5.02851	4.39773	0.591555	-0.757416	0.059153
MSTRG.101128	ENSGALG00000010225	ENSGALT00000016623	GO:0000166(nucleotide binding);GO:0003824(catalytic activity);GO:0003987(acetate-CoA ligase activity);GO:0005524(ATP binding);GO:0016208(AMP binding);GO:0016874(ligase activity);GO:0019427(acetyl-CoA biosynthetic process from acetate)	00010(Glycolysis / Gluconeogenesis);00620(Pyruvate metabolism);00630(Glyoxylate and dicarboxylate metabolism);00640(Propanoate metabolism)	acyl-CoA synthetase short-chain family member 1-like [Source:NCBI gene;Acc:423347]	0.018415	0.073506	0.0001	0.740302	0.818592	0.263612	0.0504915	-4.30782	0.0591678
MSTRG.38586	RF00015	ENSGALT00000028614	NA	NA	RNA, U4 small nuclear 2 [Source:HGNC Symbol;Acc:HGNC:10193]	1189.92	1586.25	2622.9	1390.67	1022.68	857.669	1.65057	0.722967	0.0594591
MSTRG.37956	EIF2B1	ENSGALT00000005160	GO:0003743(translation initiation factor activity);GO:0005085(guanyl-nucleotide exchange factor activity);GO:0005737(cytoplasm);GO:0005851(eukaryotic translation initiation factor 2B complex);GO:0005886(plasma membrane);GO:0006413(translational initiation);GO:0014003(oligodendrocyte development);GO:0016020(membrane);GO:0042802(identical protein binding);GO:0044237(cellular metabolic process);GO:0…	03013(RNA transport);05168(Herpes simplex virus 1 infection)	eukaryotic translation initiation factor 2B subunit alpha [Source:NCBI gene;Acc:100857736]	9.62658	4.68188	5.42163	15.0808	11.0676	11.43	0.525039	-0.929504	0.0596302
MSTRG.9641	ATP6V1A	ENSGALT00000023895;ENSGALT00000101148;ENSGALT00000023896;ENSGALT00000093236;ENSGALT00000092406	GO:0005524(ATP binding);GO:0005829(cytosol);GO:0005886(plasma membrane);GO:0005902(microvillus);GO:0006879(cellular iron ion homeostasis);GO:0015991(ATP hydrolysis coupled proton transport);GO:0016324(apical plasma membrane);GO:0033180(proton-transporting V-type ATPase, V1 domain);GO:0036295(cellular response to increased oxygen levels);GO:0046034(ATP metabolic process);GO:0046961(proton-transpor…	00190(Oxidative phosphorylation);04145(Phagosome);04150(mTOR signaling pathway);04150(mTOR signaling pathway)	ATPase H+ transporting V1 subunit A [Source:NCBI gene;Acc:395821]	33.6793	33.2273	60.8417	68.3101	63.9609	76.8677	0.610831	-0.711155	0.0596625
MSTRG.98000	ENSGALG00000039221	ENSGALT00000080177;ENSGALT00000095190	NA	NA	USP6 N-terminal like [Source:NCBI gene;Acc:423110]	1.82969	1.90081	1.01367	2.71743	2.46698	4.07789	0.512203	-0.965214	0.060123
MSTRG.20986	FGF9	ENSGALT00000103672;ENSGALT00000044176	GO:0000122(negative regulation of transcription by RNA polymerase II);GO:0001525(angiogenesis);GO:0001649(osteoblast differentiation);GO:0001654(eye development);GO:0002053(positive regulation of mesenchymal cell proliferation);GO:0002062(chondrocyte differentiation);GO:0005104(fibroblast growth factor receptor binding);GO:0005576(extracellular region);GO:0005615(extracellular space);GO:0005623(c…	04010(MAPK signaling pathway);04810(Regulation of actin cytoskeleton);04810(Regulation of actin cytoskeleton)	fibroblast growth factor 9 [Source:NCBI gene;Acc:378917]	0.0001	0.0001	0.0001	0.550784	0.582997	0.064769	0.000250302	-11.964	0.0601553
MSTRG.128650	ENSGALG00000026811	ENSGALT00000044848;ENSGALT00000106971	GO:0001568(blood vessel development);GO:0001784(phosphotyrosine residue binding);GO:0005070(SH3/SH2 adaptor activity);GO:0006469(negative regulation of protein kinase activity);GO:0007165(signal transduction);GO:0009967(positive regulation of signal transduction);GO:0030097(hemopoiesis);GO:0042100(B cell proliferation);GO:0045624(positive regulation of T-helper cell differentiation);GO:0045931(po…	NA	SH2 domain containing adaptor protein B [Source:NCBI gene;Acc:427280]	4.98352	4.34137	7.3993	11.545	8.42859	8.69077	0.583449	-0.777321	0.0601565
MSTRG.78413	SMAP1	ENSGALT00000096298;ENSGALT00000025716	GO:0005096(GTPase activator activity);GO:0005737(cytoplasm);GO:0030276(clathrin binding);GO:0043547(positive regulation of GTPase activity);GO:0045648(positive regulation of erythrocyte differentiation);GO:0046872(metal ion binding);GO:2000369(regulation of clathrin-dependent endocytosis);GO:2000369(regulation of clathrin-dependent endocytosis)	04144(Endocytosis);04144(Endocytosis)	small ArfGAP 1 [Source:NCBI gene;Acc:100858913]	5.82219	2.54872	2.51444	5.48327	7.83853	8.33071	0.502729	-0.992147	0.060234
MSTRG.40006	SURF4	ENSGALT00000043009	GO:0000139(Golgi membrane);GO:0005783(endoplasmic reticulum);GO:0005789(endoplasmic reticulum membrane);GO:0005793(endoplasmic reticulum-Golgi intermediate compartment);GO:0005794(Golgi apparatus);GO:0007030(Golgi organization);GO:0010638(positive regulation of organelle organization);GO:0016020(membrane);GO:0016021(integral component of membrane);GO:0033116(endoplasmic reticulum-Golgi intermedia…	NA	surfeit 4 [Source:NCBI gene;Acc:374273]	57.261	14.2031	11.6677	55.1451	57.7444	59.0535	0.483485	-1.04846	0.060379
MSTRG.16114	ENSGALG00000043257	ENSGALT00000087499	GO:0003796(lysozyme activity);GO:0009253(peptidoglycan catabolic process);GO:0016998(cell wall macromolecule catabolic process)	NA	lysozyme g-like [Source:NCBI gene;Acc:418700]	0.35792	0.0001	0.0001	3.00894	1.59802	1.15725	0.0621282	-4.00861	0.0603953
MSTRG.18591	NDFIP2	ENSGALT00000107873;ENSGALT00000091400;ENSGALT00000093706	GO:0005737(cytoplasm);GO:0005739(mitochondrion);GO:0005783(endoplasmic reticulum);GO:0005794(Golgi apparatus);GO:0007034(vacuolar transport);GO:0010629(negative regulation of gene expression);GO:0030001(metal ion transport);GO:0031398(positive regulation of protein ubiquitination);GO:0032410(negative regulation of transporter activity);GO:0043231(intracellular membrane-bounded organelle);GO:00484…	NA	Nedd4 family interacting protein 2 [Source:NCBI gene;Acc:418803]	8.66501	3.91984	4.49749	8.39238	9.08983	13.077	0.558991	-0.839102	0.060403
MSTRG.122218	TNFSF10	ENSGALT00000089668	GO:0005125(cytokine activity);GO:0005164(tumor necrosis factor receptor binding);GO:0005515(protein binding);GO:0005615(extracellular space);GO:0006955(immune response);GO:0008270(zinc ion binding);GO:0010469(regulation of signaling receptor activity);GO:0016020(membrane);GO:0016021(integral component of membrane);GO:0032813(tumor necrosis factor receptor superfamily binding);GO:0042802(identical…	04060(Cytokine-cytokine receptor interaction);04068(FoxO signaling pathway);04210(Apoptosis);04217(Necroptosis);05164(Influenza A)	tumor necrosis factor superfamily member 10 [Source:NCBI gene;Acc:378894]	3.12591	5.72409	5.69001	4.76156	3.95801	23.8542	0.446371	-1.16368	0.0605485
MSTRG.22183	RSF1	ENSGALT00000057974;ENSGALT00000102584	GO:0005634(nucleus);GO:0005654(nucleoplasm);GO:0006334(nucleosome assembly);GO:0006338(chromatin remodeling);GO:0006352(DNA-templated transcription, initiation);GO:0006355(regulation of transcription, DNA-templated);GO:0016584(nucleosome positioning);GO:0031213(RSF complex);GO:0042393(histone binding);GO:0043392(negative regulation of DNA binding);GO:0045892(negative regulation of transcription, …	NA	remodeling and spacing factor 1 [Source:NCBI gene;Acc:426483]	6.38033	4.31853	4.21441	6.34388	7.84778	11.1137	0.589333	-0.762844	0.0606291
MSTRG.13757	ENSGALG00000045925	ENSGALT00000084042	GO:0005102(signaling receptor binding);GO:0009897(external side of plasma membrane);GO:0050776(regulation of immune response);GO:0050852(T cell receptor signaling pathway)	NA		0.0001	0.0001	0.0001	1.49796	1.56388	0.187653	9.2322e-05	-13.403	0.0607762
MSTRG.63167	XKR8	ENSGALT00000048274	GO:0005886(plasma membrane);GO:0016020(membrane);GO:0016021(integral component of membrane);GO:0043652(engulfment of apoptotic cell);GO:0070782(phosphatidylserine exposure on apoptotic cell surface);GO:1902742(apoptotic process involved in development)	NA	XK related 8 [Source:NCBI gene;Acc:724081]	0.0001	0.0001	0.0001	0.145061	0.689676	0.662213	0.000200407	-12.2848	0.0608098
MSTRG.37394	RANBP1	ENSGALT00000100516;ENSGALT00000003289	GO:0005096(GTPase activator activity);GO:0005634(nucleus);GO:0005643(nuclear pore);GO:0005737(cytoplasm);GO:0005813(centrosome);GO:0005829(cytosol);GO:0007051(spindle organization);GO:0008536(Ran GTPase binding);GO:0043547(positive regulation of GTPase activity);GO:0046604(positive regulation of mitotic centrosome separation);GO:0046907(intracellular transport);GO:0046907(intracellular transport)	NA	RAN binding protein 1 [Source:NCBI gene;Acc:416787]	19.7351	22.1791	75.3105	18.1598	28.0994	15.1447	1.90908	0.932875	0.0615587
MSTRG.28310	ZFHX3	ENSGALT00000063417;ENSGALT00000001009	GO:0000122(negative regulation of transcription by RNA polymerase II);GO:0000978(RNA polymerase II proximal promoter sequence-specific DNA binding);GO:0003676(nucleic acid binding);GO:0003677(DNA binding);GO:0005634(nucleus);GO:0005667(transcription factor complex);GO:0005737(cytoplasm);GO:0006355(regulation of transcription, DNA-templated);GO:0007420(brain development);GO:0008270(zinc ion bindin…	NA	zinc finger homeobox 3 [Source:NCBI gene;Acc:395682]	4.47488	5.32096	3.90208	2.9932	2.06235	3.27768	1.64377	0.717009	0.0616393
MSTRG.9831	VANGL1	ENSGALT00000024232	GO:0005886(plasma membrane);GO:0007275(multicellular organism development);GO:0016020(membrane);GO:0016021(integral component of membrane);GO:0016328(lateral plasma membrane);GO:0043473(pigmentation)	04310(Wnt signaling pathway)	VANGL planar cell polarity protein 1 [Source:NCBI gene;Acc:418337]	5.31409	5.01567	2.70074	7.10555	7.85188	7.38765	0.583148	-0.778065	0.0618592
MSTRG.65757	TRIM33	ENSGALT00000003070	GO:0005515(protein binding);GO:0005622(intracellular);GO:0005634(nucleus);GO:0008270(zinc ion binding);GO:0016567(protein ubiquitination);GO:0017015(regulation of transforming growth factor beta receptor signaling pathway);GO:0030514(negative regulation of BMP signaling pathway);GO:0046872(metal ion binding);GO:0070410(co-SMAD binding);GO:0070412(R-SMAD binding)	NA	tripartite motif containing 33 [Source:HGNC Symbol;Acc:HGNC:16290]	7.49404	7.29952	10.2054	14.8714	13.353	12.2134	0.618208	-0.693836	0.0619194
MSTRG.99405	ENSGALG00000045796	ENSGALT00000032639	GO:0004620(phospholipase activity);GO:0004623(phospholipase A2 activity);GO:0005509(calcium ion binding);GO:0005544(calcium-dependent phospholipid binding);GO:0005737(cytoplasm);GO:0006629(lipid metabolic process);GO:0009395(phospholipid catabolic process);GO:0016042(lipid catabolic process);GO:0016787(hydrolase activity);GO:0046475(glycerophospholipid catabolic process);GO:0046872(metal ion bind…	00564(Glycerophospholipid metabolism);00565(Ether lipid metabolism);00590(Arachidonic acid metabolism);00591(Linoleic acid metabolism);00592(alpha-Linolenic acid metabolism);04010(MAPK signaling pathway);04217(Necroptosis);04270(Vascular smooth muscle contraction);04370(VEGF signaling pathway);04912(GnRH signaling pathway)	phospholipase A2 group IVE-like 7 [Source:NCBI gene;Acc:423226]	0.0001	0.0001	0.0001	0.116615	0.376665	0.301954	0.000377247	-11.3722	0.0621082
MSTRG.72805	ENSGALG00000050481;ENSGALG00000048321	ENSGALT00000100473;ENSGALT00000058745	GO:0007040(lysosome organization);GO:0007040(lysosome organization)	NA		4.16901	4.32573	3.43083	5.67581	5.25732	8.82006	0.603729	-0.728027	0.0621198
MSTRG.38153	USP30	ENSGALT00000046436;ENSGALT00000057064	GO:0000422(autophagy of mitochondrion);GO:0004197(cysteine-type endopeptidase activity);GO:0004843(thiol-dependent ubiquitin-specific protease activity);GO:0005739(mitochondrion);GO:0005741(mitochondrial outer membrane);GO:0006511(ubiquitin-dependent protein catabolic process);GO:0008053(mitochondrial fusion);GO:0016020(membrane);GO:0016021(integral component of membrane);GO:0016579(protein deubi…	04137(Mitophagy - animal);04137(Mitophagy - animal)	ubiquitin specific peptidase 30 [Source:NCBI gene;Acc:416896]	2.64976	2.58955	1.53766	3.48438	4.92939	4.24414	0.535394	-0.901327	0.0621661
MSTRG.185	KLHDC10;gga-mir-6629	ENSGALT00000013005;ENSGALT00000093249;ENSGALT00000044429	GO:0005515(protein binding);GO:0005654(nucleoplasm);GO:0032874(positive regulation of stress-activated MAPK cascade);GO:0032874(positive regulation of stress-activated MAPK cascade)	NA	kelch domain containing 10 [Source:NCBI gene;Acc:427683];gga-mir-6629 [Source:miRBase;Acc:MI0022448]	8.64602	8.29626	8.06895	12.9588	13.1787	18.0703	0.565765	-0.821726	0.0622896
MSTRG.27917	TLDC1	ENSGALT00000070930;ENSGALT00000087079	GO:0005737(cytoplasm);GO:0005765(lysosomal membrane);GO:0016020(membrane);GO:0030334(regulation of cell migration);GO:0031667(response to nutrient levels);GO:0031929(TOR signaling);GO:0032868(response to insulin);GO:0042127(regulation of cell population proliferation);GO:0043200(response to amino acid);GO:0150032(positive regulation of protein localization to lysosome);GO:1903204(negative regulat…	NA	TBC/LysM-associated domain containing 1 [Source:NCBI gene;Acc:415815]	3.48947	3.06939	2.59024	0.597088	1.81823	1.86174	2.13911	1.09701	0.0624652
MSTRG.66959	PLEKHJ1	ENSGALT00000041212	GO:0001881(receptor recycling);GO:0005769(early endosome);GO:0005802(trans-Golgi network);GO:0005829(cytosol);GO:0007032(endosome organization);GO:0042147(retrograde transport, endosome to Golgi);GO:0055037(recycling endosome)	NA	pleckstrin homology domain containing J1 [Source:NCBI gene;Acc:428324]	27.552	31.4261	23.6878	8.40514	19.1869	20.7318	1.71066	0.774556	0.0625293
MSTRG.26658	NKD1	ENSGALT00000103050;ENSGALT00000005977;ENSGALT00000055713	GO:0000159(protein phosphatase type 2A complex);GO:0005509(calcium ion binding);GO:0005737(cytoplasm);GO:0030165(PDZ domain binding);GO:0030178(negative regulation of Wnt signaling pathway);GO:0045732(positive regulation of protein catabolic process);GO:0090090(negative regulation of canonical Wnt signaling pathway);GO:1901231(positive regulation of non-canonical Wnt signaling pathway via JNK cas…	04310(Wnt signaling pathway);04310(Wnt signaling pathway)	naked cuticle homolog 1 [Source:NCBI gene;Acc:415729]	2.8938	4.80955	4.33429	7.70923	5.56097	6.45956	0.610126	-0.71282	0.0625688
MSTRG.117506	ENSGALG00000005776	ENSGALT00000048943	GO:0006629(lipid metabolic process);GO:0016020(membrane);GO:0016021(integral component of membrane);GO:0016491(oxidoreductase activity);GO:0016627(oxidoreductase activity, acting on the CH-CH group of donors);GO:0042761(very long-chain fatty acid biosynthetic process);GO:0055114(oxidation-reduction process)	00062(Fatty acid elongation);01040(Biosynthesis of unsaturated fatty acids)	trans-2,3-enoyl-CoA reductase [Source:NCBI gene;Acc:424491]	10.3198	6.67356	3.22708	3.93947	2.35584	4.10928	1.94341	0.958591	0.0627166
MSTRG.12843	ADAMTS5	ENSGALT00000025470	GO:0004222(metalloendopeptidase activity);GO:0005615(extracellular space);GO:0006508(proteolysis);GO:0008201(heparin binding);GO:0008237(metallopeptidase activity);GO:0008270(zinc ion binding);GO:0042742(defense response to bacterium);GO:0050840(extracellular matrix binding);GO:0062023(collagen-containing extracellular matrix);GO:0120163(negative regulation of cold-induced thermogenesis)	NA	ADAM metallopeptidase with thrombospondin type 1 motif 5 [Source:NCBI gene;Acc:427971]	1.18448	0.032567	0.597936	2.69988	2.6036	1.47212	0.267871	-1.90039	0.0627178
MSTRG.3177	NRCAM	ENSGALT00000052324;ENSGALT00000048710;ENSGALT00000066598;ENSGALT00000063987;ENSGALT00000015492;ENSGALT00000105834;ENSGALT00000066268;ENSGALT00000049128;ENSGALT00000093468	GO:0001525(angiogenesis);GO:0005515(protein binding);GO:0005886(plasma membrane);GO:0007411(axon guidance);GO:0007417(central nervous system development);GO:0008104(protein localization);GO:0010975(regulation of neuron projection development);GO:0016020(membrane);GO:0016021(integral component of membrane);GO:0019227(neuronal action potential propagation);GO:0030424(axon);GO:0030506(ankyrin bindin…	04514(Cell adhesion molecules (CAMs));04514(Cell adhesion molecules (CAMs))	neuronal cell adhesion molecule [Source:NCBI gene;Acc:396202]	4.19668	2.56005	3.79109	6.26367	6.83784	4.71357	0.592072	-0.756154	0.0628164
MSTRG.119950	ATG4B	ENSGALT00000085496;ENSGALT00000105472;ENSGALT00000010179	GO:0000045(autophagosome assembly);GO:0004175(endopeptidase activity);GO:0004197(cysteine-type endopeptidase activity);GO:0005737(cytoplasm);GO:0006508(proteolysis);GO:0006914(autophagy);GO:0008233(peptidase activity);GO:0008234(cysteine-type peptidase activity);GO:0015031(protein transport);GO:0016787(hydrolase activity);GO:0051697(protein delipidation);GO:0051697(protein delipidation)	04136(Autophagy - other);04140(Autophagy - animal);04140(Autophagy - animal)	autophagy related 4B cysteine peptidase [Source:NCBI gene;Acc:404750]	6.03909	4.58638	6.3401	10.4274	8.56832	9.45501	0.596313	-0.745858	0.0629597
MSTRG.95504	ENSGALG00000027778	ENSGALT00000042833	GO:0000166(nucleotide binding);GO:0003924(GTPase activity);GO:0005525(GTP binding);GO:0007165(signal transduction);GO:0016020(membrane)	NA	ras-related and estrogen-regulated growth inhibitor-like [Source:NCBI gene;Acc:770492]	0.0001	0.0001	0.0001	0.518302	0.134951	0.575309	0.000244188	-11.9997	0.0631514
MSTRG.35081	NUDT1	ENSGALT00000040967;ENSGALT00000083529	GO:0003924(GTPase activity);GO:0005634(nucleus);GO:0005737(cytoplasm);GO:0005739(mitochondrion);GO:0005759(mitochondrial matrix);GO:0005829(cytosol);GO:0006195(purine nucleotide catabolic process);GO:0006203(dGTP catabolic process);GO:0006281(DNA repair);GO:0008413(8-oxo-7,8-dihydroguanosine triphosphate pyrophosphatase activity);GO:0016787(hydrolase activity);GO:0030515(snoRNA binding);GO:003553…	NA	nudix hydrolase 1 [Source:NCBI gene;Acc:416467]	9.87388	12.2309	7.80514	5.74928	4.28165	5.0938	1.97755	0.983712	0.0633017
MSTRG.111930	PGAP1	ENSGALT00000074404	GO:0005783(endoplasmic reticulum);GO:0006505(GPI anchor metabolic process);GO:0006888(endoplasmic reticulum to Golgi vesicle-mediated transport);GO:0007605(sensory perception of sound);GO:0009880(embryonic pattern specification);GO:0009948(anterior/posterior axis specification);GO:0016020(membrane);GO:0016021(integral component of membrane);GO:0016788(hydrolase activity, acting on ester bonds);GO…	00563(Glycosylphosphatidylinositol (GPI)-anchor biosynthesis)	post-GPI attachment to proteins 1 [Source:NCBI gene;Acc:424054]	6.10597	3.37704	3.1938	2.00627	2.80511	2.469	1.74123	0.800104	0.0637299
MSTRG.40512	MYOCD	ENSGALT00000001507;ENSGALT00000092606;ENSGALT00000097579	GO:0000122(negative regulation of transcription by RNA polymerase II);GO:0000790(nuclear chromatin);GO:0000978(RNA polymerase II proximal promoter sequence-specific DNA binding);GO:0000987(proximal promoter sequence-specific DNA binding);GO:0001228(DNA-binding transcription activator activity, RNA polymerase II-specific);GO:0001560(regulation of cell growth by extracellular stimulus);GO:0001570(v…	NA	myocardin [Source:NCBI gene;Acc:427790]	4.2348	4.07421	3.83163	6.78759	6.98455	5.94504	0.615739	-0.69961	0.0639752
MSTRG.10222	ST3GAL6	ENSGALT00000024610;ENSGALT00000099319;ENSGALT00000036915;ENSGALT00000090741;ENSGALT00000051623	GO:0005794(Golgi apparatus);GO:0006486(protein glycosylation);GO:0008373(sialyltransferase activity);GO:0009247(glycolipid biosynthetic process);GO:0016020(membrane);GO:0016021(integral component of membrane);GO:0016740(transferase activity);GO:0016757(transferase activity, transferring glycosyl groups);GO:0052798(beta-galactoside alpha-2,3-sialyltransferase activity);GO:0097503(sialylation);GO:0…	00601(Glycosphingolipid biosynthesis - lacto and neolacto series);00601(Glycosphingolipid biosynthesis - lacto and neolacto series)	ST3 beta-galactoside alpha-2,3-sialyltransferase 6 [Source:NCBI gene;Acc:395138]	1.67451	0.985706	0.748517	3.07649	2.58219	1.6616	0.465657	-1.10266	0.0639789
MSTRG.61055	FAM210B	ENSGALT00000038940	GO:0005741(mitochondrial outer membrane);GO:0016020(membrane);GO:0016021(integral component of membrane);GO:0031224(intrinsic component of membrane);GO:0045648(positive regulation of erythrocyte differentiation);GO:0071392(cellular response to estradiol stimulus)	NA	family with sequence similarity 210 member B [Source:NCBI gene;Acc:428168]	13.4295	7.8007	8.30354	6.05712	6.59774	4.50167	1.72143	0.783607	0.0640543
MSTRG.103733	ZBTB25	ENSGALT00000044533	GO:0003676(nucleic acid binding);GO:0003677(DNA binding);GO:0005515(protein binding);GO:0005654(nucleoplasm);GO:0005737(cytoplasm);GO:0010467(gene expression)	NA	zinc finger and BTB domain containing 25 [Source:NCBI gene;Acc:423505]	0.394968	2.08603	0.695304	0.884746	4.46767	3.90563	0.343086	-1.54336	0.0640604
MSTRG.5954	MAFF	ENSGALT00000020063;ENSGALT00000093539	GO:0000978(RNA polymerase II proximal promoter sequence-specific DNA binding);GO:0003677(DNA binding);GO:0003700(DNA-binding transcription factor activity);GO:0005634(nucleus);GO:0005739(mitochondrion);GO:0006355(regulation of transcription, DNA-templated);GO:0035914(skeletal muscle cell differentiation);GO:0043565(sequence-specific DNA binding);GO:0045604(regulation of epidermal cell differentia…	NA	MAF bZIP transcription factor F [Source:NCBI gene;Acc:395519]	4.79973	10.9227	4.74255	7.7283	15.3167	16.1479	0.522161	-0.937435	0.0640634
MSTRG.113667	TANK	ENSGALT00000033125;ENSGALT00000100844	GO:0004843(thiol-dependent ubiquitin-specific protease activity);GO:0005829(cytosol);GO:0006974(cellular response to DNA damage stimulus);GO:0007249(I-kappaB kinase/NF-kappaB signaling);GO:0031625(ubiquitin protein ligase binding);GO:0032991(protein-containing complex);GO:0035800(deubiquitinase activator activity);GO:0043124(negative regulation of I-kappaB kinase/NF-kappaB signaling);GO:0071347(c…	04621(NOD-like receptor signaling pathway);04622(RIG-I-like receptor signaling pathway);04622(RIG-I-like receptor signaling pathway)	TRAF family member associated NFKB activator [Source:NCBI gene;Acc:424190]	5.2202	3.31441	1.87672	6.15983	5.77388	7.84109	0.526495	-0.925509	0.0644394
MSTRG.94493	FGFR3	ENSGALT00000001712	GO:0000166(nucleotide binding);GO:0004672(protein kinase activity);GO:0004713(protein tyrosine kinase activity);GO:0004714(transmembrane receptor protein tyrosine kinase activity);GO:0005007(fibroblast growth factor-activated receptor activity);GO:0005524(ATP binding);GO:0005783(endoplasmic reticulum);GO:0005794(Golgi apparatus);GO:0005886(plasma membrane);GO:0005887(integral component of plasma …	04010(MAPK signaling pathway);04144(Endocytosis);04810(Regulation of actin cytoskeleton)	fibroblast growth factor receptor 3 [Source:NCBI gene;Acc:396515]	28.5829	32.5114	20.4081	13.3852	11.6212	23.7802	1.67058	0.740353	0.0645164
MSTRG.97511	PHLDA2	ENSGALT00000067796	GO:0009887(animal organ morphogenesis);GO:0010468(regulation of gene expression);GO:0030334(regulation of cell migration);GO:0045995(regulation of embryonic development);GO:0060721(regulation of spongiotrophoblast cell proliferation);GO:0070873(regulation of glycogen metabolic process);GO:1903547(regulation of growth hormone activity)	NA	pleckstrin homology like domain family A member 2 [Source:NCBI gene;Acc:423088]	2.74365	2.68554	0.817304	4.6532	5.03524	7.03833	0.373443	-1.42104	0.0645366
MSTRG.32894	SPINK6	ENSGALT00000064714	GO:0005515(protein binding);GO:0016020(membrane);GO:0016021(integral component of membrane)	NA	serine peptidase inhibitor, Kazal type 6 [Source:HGNC Symbol;Acc:HGNC:29486]	0.0001	2.41561	5.50401	0.0001	0.0001	0.0001	26399.1	14.6882	0.0647072
MSTRG.29182	MKRN2OS	ENSGALT00000043832	NA	NA	MKRN2 opposite strand [Source:NCBI gene;Acc:415966]	5.72238	3.48797	8.60874	1.9414	3.2684	2.47368	2.31915	1.21359	0.06473
MSTRG.49360	TNS3	ENSGALT00000084987	GO:0005515(protein binding);GO:0005829(cytosol);GO:0005925(focal adhesion);GO:0008284(positive regulation of cell population proliferation);GO:0016477(cell migration);GO:0048286(lung alveolus development)	NA	tensin 3 [Source:NCBI gene;Acc:420792]	6.68555	5.8954	2.35889	8.162	9.45694	8.92648	0.562803	-0.829299	0.0648048
MSTRG.57826	ENSGALG00000041553	ENSGALT00000059722	NA	NA		25.6585	21.6397	12.4671	11.2211	8.67201	13.4478	1.79256	0.842019	0.0651528
MSTRG.98975	ENSGALG00000028327	ENSGALT00000079537	GO:0016020(membrane);GO:0016021(integral component of membrane)	NA		1.78765	1.04709	1.55583	1.98629	3.51666	3.40981	0.492615	-1.02147	0.0651934
MSTRG.61482	PER3	ENSGALT00000000797	GO:0000122(negative regulation of transcription by RNA polymerase II);GO:0000976(transcription regulatory region sequence-specific DNA binding);GO:0001222(transcription corepressor binding);GO:0005515(protein binding);GO:0005634(nucleus);GO:0005737(cytoplasm);GO:0007623(circadian rhythm);GO:0008134(transcription factor binding);GO:0009416(response to light stimulus);GO:0019900(kinase binding);GO:…	NA	period circadian clock 3 [Source:NCBI gene;Acc:419366]	7.97147	7.95894	6.05693	5.56701	4.63771	3.45639	1.60948	0.686599	0.065264
MSTRG.99520	ENSGALG00000009156	ENSGALT00000014915	NA	NA	codanin 1 [Source:NCBI gene;Acc:423239]	1.85786	2.57294	3.92512	4.31319	4.79678	4.85525	0.598337	-0.740969	0.0654945
MSTRG.43570	ENSGALG00000050931	ENSGALT00000106381;ENSGALT00000106773;ENSGALT00000103060	GO:0005854(nascent polypeptide-associated complex);GO:0005854(nascent polypeptide-associated complex)	NA	NAC alpha domain containing [Source:NCBI gene;Acc:420409]	20.0356	24.5133	2.3186	5.63334	5.15452	9.90432	2.26499	1.1795	0.0655286
MSTRG.24091	GABPB1	ENSGALT00000060616;ENSGALT00000038751	GO:0005515(protein binding);GO:0005634(nucleus);GO:0005654(nucleoplasm);GO:0036464(cytoplasmic ribonucleoprotein granule);GO:0044212(transcription regulatory region DNA binding);GO:0045944(positive regulation of transcription by RNA polymerase II);GO:0046982(protein heterodimerization activity);GO:0046982(protein heterodimerization activity)	NA	GA binding protein transcription factor beta subunit 1 [Source:NCBI gene;Acc:415453]	3.93719	3.50771	0.928289	5.06473	4.87168	7.158	0.48982	-1.02968	0.0655457
MSTRG.85740	ENSGALG00000009128	ENSGALT00000014861	NA	NA	chromosome X open reading frame 40B [Source:NCBI gene;Acc:772269]	3.46893	2.6191	3.45997	7.16937	6.15881	7.6026	0.45617	-1.13236	0.0655751
MSTRG.32839	FGFR4	ENSGALT00000025332;ENSGALT00000096163	GO:0000166(nucleotide binding);GO:0004672(protein kinase activity);GO:0004713(protein tyrosine kinase activity);GO:0004714(transmembrane receptor protein tyrosine kinase activity);GO:0005007(fibroblast growth factor-activated receptor activity);GO:0005524(ATP binding);GO:0005783(endoplasmic reticulum);GO:0005794(Golgi apparatus);GO:0005886(plasma membrane);GO:0005887(integral component of plasma …	04010(MAPK signaling pathway);04144(Endocytosis);04810(Regulation of actin cytoskeleton);04810(Regulation of actin cytoskeleton)	fibroblast growth factor receptor 4 [Source:NCBI gene;Acc:395603]	2.80512	4.8533	3.40821	1.65245	2.23498	1.99335	1.88183	0.912137	0.0656018
MSTRG.82797	HSF3	ENSGALT00000066789;ENSGALT00000101581;ENSGALT00000092990	GO:0000978(RNA polymerase II proximal promoter sequence-specific DNA binding);GO:0003677(DNA binding);GO:0003700(DNA-binding transcription factor activity);GO:0005634(nucleus);GO:0006355(regulation of transcription, DNA-templated);GO:0006357(regulation of transcription by RNA polymerase II);GO:0034605(cellular response to heat);GO:0043565(sequence-specific DNA binding);GO:0061408(positive regulat…	NA	Heat shock factor protein 3 [Source:NCBI gene;Acc:422169]	4.96116	2.25499	4.96884	5.47138	9.82425	6.50558	0.558914	-0.839302	0.0657513
MSTRG.111981	RFTN2	ENSGALT00000085684;ENSGALT00000080890	GO:0033227(dsRNA transport);GO:0043330(response to exogenous dsRNA);GO:0043330(response to exogenous dsRNA)	NA	raftlin family member 2 [Source:NCBI gene;Acc:424062]	1.67325	0.657423	1.06384	2.14303	2.78564	1.87794	0.498708	-1.00373	0.0658282
MSTRG.47854	SH3BP5	ENSGALT00000073498	GO:0004860(protein kinase inhibitor activity);GO:0005654(nucleoplasm);GO:0006469(negative regulation of protein kinase activity);GO:0016604(nuclear body);GO:0017112(Rab guanyl-nucleotide exchange factor activity);GO:0030659(cytoplasmic vesicle membrane);GO:0035556(intracellular signal transduction)	NA	SH3 domain binding protein 5 [Source:NCBI gene;Acc:420682]	4.12915	8.16108	2.76962	2.00633	2.52323	2.85486	2.03941	1.02815	0.0659317
MSTRG.63181	PTAFR	ENSGALT00000107733;ENSGALT00000001134	GO:0001530(lipopolysaccharide binding);GO:0001816(cytokine production);GO:0001875(lipopolysaccharide receptor activity);GO:0004930(G protein-coupled receptor activity);GO:0004992(platelet activating factor receptor activity);GO:0005543(phospholipid binding);GO:0006935(chemotaxis);GO:0006954(inflammatory response);GO:0007165(signal transduction);GO:0007186(G protein-coupled receptor signaling path…	04020(Calcium signaling pathway);04080(Neuroactive ligand-receptor interaction);04080(Neuroactive ligand-receptor interaction)	platelet activating factor receptor [Source:NCBI gene;Acc:428209]	0.103917	0.235848	0.0001	0.591572	1.01643	0.714424	0.146341	-2.7726	0.0660873
MSTRG.41509	RPL38	ENSGALT00000002220	GO:0001501(skeletal system development);GO:0001503(ossification);GO:0002181(cytoplasmic translation);GO:0003735(structural constituent of ribosome);GO:0005622(intracellular);GO:0005840(ribosome);GO:0006412(translation);GO:0006417(regulation of translation);GO:0007605(sensory perception of sound);GO:0014069(postsynaptic density);GO:0022625(cytosolic large ribosomal subunit);GO:0033291(eukaryotic 8…	03010(Ribosome)	ribosomal protein L38 [Source:NCBI gene;Acc:771528]	8.77947	8.00496	7.47748	9.05665	22.0707	12.5746	0.555168	-0.849004	0.0662793
MSTRG.45631	SRI	ENSGALT00000048340;ENSGALT00000069162;ENSGALT00000014615	GO:0005509(calcium ion binding);GO:0005509(calcium ion binding)	NA	sorcin [Source:NCBI gene;Acc:420538]	13.0464	11.4242	17.384	5.68678	5.55098	11.7775	1.81856	0.862799	0.066451
MSTRG.107757	TM9SF3	ENSGALT00000008877;ENSGALT00000098154	GO:0016020(membrane);GO:0016021(integral component of membrane);GO:0072657(protein localization to membrane);GO:0072657(protein localization to membrane)	NA	transmembrane 9 superfamily member 3 [Source:NCBI gene;Acc:395460]	11.1048	8.6787	13.0047	18.7532	16.3779	17.0097	0.628838	-0.66924	0.0664896
MSTRG.54208	ANKRD29	ENSGALT00000078436;ENSGALT00000024247	GO:0005515(protein binding);GO:0005515(protein binding)	NA	ankyrin repeat domain 29 [Source:NCBI gene;Acc:428523]	3.30544	2.819	8.19863	5.09855	10.9247	11.9204	0.51257	-0.964179	0.0668844
MSTRG.80631	GEN1	ENSGALT00000026572	GO:0000287(magnesium ion binding);GO:0000400(four-way junction DNA binding);GO:0000724(double-strand break repair via homologous recombination);GO:0003677(DNA binding);GO:0003824(catalytic activity);GO:0004518(nuclease activity);GO:0004523(RNA-DNA hybrid ribonuclease activity);GO:0005634(nucleus);GO:0005813(centrosome);GO:0006281(DNA repair);GO:0008409(5'-3' exonuclease activity);GO:0008821(cross…	NA	GEN1, Holliday junction 5' flap endonuclease [Source:NCBI gene;Acc:421951]	7.08744	4.6768	6.32784	7.71943	14.1633	8.56766	0.59415	-0.751101	0.06694
MSTRG.63645	KIAA0319L	ENSGALT00000100628;ENSGALT00000096866;ENSGALT00000106866;ENSGALT00000090846;ENSGALT00000040850	GO:0005515(protein binding);GO:0005886(plasma membrane);GO:0016020(membrane);GO:0016021(integral component of membrane);GO:0031410(cytoplasmic vesicle);GO:0031410(cytoplasmic vesicle)	NA	KIAA0319 like [Source:NCBI gene;Acc:419634]	3.48197	2.32718	3.0432	4.60855	4.87518	5.43645	0.593314	-0.753133	0.0670581
MSTRG.5303	NTN4	ENSGALT00000018613	GO:0005515(protein binding);GO:0005576(extracellular region);GO:0005604(basement membrane);GO:0016322(neuron remodeling);GO:0043237(laminin-1 binding);GO:0060668(regulation of branching involved in salivary gland morphogenesis by extracellular matrix-epithelial cell signaling)	NA	netrin 4 [Source:NCBI gene;Acc:417914]	2.08056	3.40996	1.66339	6.74324	3.11442	5.49384	0.466007	-1.10158	0.0670864
MSTRG.7663	RECQL	ENSGALT00000021517	GO:0000166(nucleotide binding);GO:0000724(double-strand break repair via homologous recombination);GO:0000733(DNA strand renaturation);GO:0003676(nucleic acid binding);GO:0003677(DNA binding);GO:0003678(DNA helicase activity);GO:0004386(helicase activity);GO:0005515(protein binding);GO:0005524(ATP binding);GO:0005634(nucleus);GO:0005654(nucleoplasm);GO:0005694(chromosome);GO:0005737(cytoplasm);GO…	NA	RecQ like helicase [Source:NCBI gene;Acc:378910]	5.35245	6.13656	2.33907	8.49843	7.70187	9.83126	0.531205	-0.912661	0.0671318
MSTRG.11348	VGLL3	ENSGALT00000024991	GO:0005634(nucleus);GO:0006355(regulation of transcription, DNA-templated)	NA	vestigial like family member 3 [Source:NCBI gene;Acc:418462]	20.0942	8.03877	25.8966	32.3719	37.6809	24.6484	0.570527	-0.809634	0.0671526
MSTRG.113051	DCAF17	ENSGALT00000047481	GO:0005654(nucleoplasm);GO:0005829(cytosol);GO:0016567(protein ubiquitination);GO:0080008(Cul4-RING E3 ubiquitin ligase complex)	NA	DDB1 and CUL4 associated factor 17 [Source:NCBI gene;Acc:424153]	6.17477	4.33861	3.80918	10.1281	10.7964	5.41106	0.543849	-0.878722	0.0671612
MSTRG.67032	PTBP1	ENSGALT00000089925;ENSGALT00000082242;ENSGALT00000003039	GO:0000381(regulation of alternative mRNA splicing, via spliceosome);GO:0003676(nucleic acid binding);GO:0003723(RNA binding);GO:0005634(nucleus);GO:0006397(mRNA processing);GO:0033119(negative regulation of RNA splicing);GO:0035307(positive regulation of protein dephosphorylation);GO:0036002(pre-mRNA binding);GO:0048025(negative regulation of mRNA splicing, via spliceosome);GO:0051148(negative r…	NA	polypyrimidine tract binding protein 1 [Source:NCBI gene;Acc:420098]	15.0775	23.7928	5.52212	28.5491	30.3409	21.7108	0.550768	-0.860484	0.0675125
MSTRG.9226	PHC1	ENSGALT00000023070	GO:0005515(protein binding);GO:0005634(nucleus);GO:0008270(zinc ion binding);GO:0016574(histone ubiquitination);GO:0031519(PcG protein complex);GO:0035102(PRC1 complex)	NA	polyhomeotic homolog 1 [Source:NCBI gene;Acc:418252]	3.82778	1.965	2.04173	4.17476	4.36308	5.99122	0.53923	-0.891026	0.0675728
MSTRG.64900	ENSGALG00000041435;ENSGALG00000047376;ENSGALG00000046828	ENSGALT00000102946;ENSGALT00000096013;ENSGALT00000072081;ENSGALT00000091570	GO:0005643(nuclear pore);GO:0016020(membrane);GO:0016021(integral component of membrane);GO:0005739(mitochondrion);GO:0008637(apoptotic mitochondrial changes);GO:0042127(regulation of cell population proliferation)	03013(RNA transport);03013(RNA transport)	nucleoporin 210 like [Source:NCBI gene;Acc:426146]	2.98795	2.0808	3.65011	6.19405	4.23695	4.31155	0.591408	-0.757774	0.0679522
MSTRG.53013	FAM65B	ENSGALT00000022165;ENSGALT00000078495;ENSGALT00000099120;ENSGALT00000103040	GO:0007162(negative regulation of cell adhesion);GO:0007605(sensory perception of sound);GO:0016020(membrane);GO:0016021(integral component of membrane);GO:0032420(stereocilium);GO:0035024(negative regulation of Rho protein signal transduction);GO:0042802(identical protein binding);GO:0045184(establishment of protein localization);GO:0048741(skeletal muscle fiber development);GO:0051260(protein h…	NA	family with sequence similarity 65, member B [Source:NCBI gene;Acc:421003]	0.98413	0.778818	0.557437	0.388874	0.249969	0.221916	2.69574	1.43068	0.0680482
MSTRG.76628	ENSGALG00000047141	ENSGALT00000102103	NA	NA		2.0728	1.68387	0.667864	2.54816	3.75145	3.72431	0.441398	-1.17985	0.068074
MSTRG.32422	IL-12B	ENSGALT00000041052;ENSGALT00000002145	GO:0001916(positive regulation of T cell mediated cytotoxicity);GO:0002230(positive regulation of defense response to virus by host);GO:0002827(positive regulation of T-helper 1 type immune response);GO:0002860(positive regulation of natural killer cell mediated cytotoxicity directed against tumor cell target);GO:0002862(negative regulation of inflammatory response to antigenic stimulus);GO:00048…	04060(Cytokine-cytokine receptor interaction);04620(Toll-like receptor signaling pathway);04622(RIG-I-like receptor signaling pathway);04625(C-type lectin receptor signaling pathway);05164(Influenza A);05168(Herpes simplex virus 1 infection);05168(Herpes simplex virus 1 infection)	interleukin 12B [Source:NCBI gene;Acc:404671]	0.0001	0.0001	0.0001	0.442092	0.376897	0.113827	0.000321607	-11.6024	0.0681608
MSTRG.13583	PRDM15	ENSGALT00000090664;ENSGALT00000070953;ENSGALT00000093673;ENSGALT00000026017	GO:0000977(RNA polymerase II regulatory region sequence-specific DNA binding);GO:0000978(RNA polymerase II proximal promoter sequence-specific DNA binding);GO:0003676(nucleic acid binding);GO:0003700(DNA-binding transcription factor activity);GO:0005515(protein binding);GO:0005634(nucleus);GO:0005654(nucleoplasm);GO:0006355(regulation of transcription, DNA-templated);GO:0016604(nuclear body);GO:0…	NA	PR/SET domain 15 [Source:NCBI gene;Acc:418531]	3.75574	3.45385	2.53786	6.2294	5.08176	5.6576	0.574435	-0.799785	0.068283
MSTRG.56959	DPY19L4	ENSGALT00000078528;ENSGALT00000071644	GO:0000030(mannosyltransferase activity);GO:0005637(nuclear inner membrane);GO:0016020(membrane);GO:0016021(integral component of membrane);GO:0018406(protein C-linked glycosylation via 2'-alpha-mannosyl-L-tryptophan);GO:0018406(protein C-linked glycosylation via 2'-alpha-mannosyl-L-tryptophan)	NA	dpy-19 like 4 [Source:NCBI gene;Acc:420229]	3.88236	4.2669	4.18796	4.27096	8.28387	7.89484	0.603297	-0.729059	0.0684471
MSTRG.65257	GNAI3	ENSGALT00000060455;ENSGALT00000084405;ENSGALT00000087627	GO:0000139(Golgi membrane);GO:0000166(nucleotide binding);GO:0001664(G protein-coupled receptor binding);GO:0003924(GTPase activity);GO:0005525(GTP binding);GO:0005634(nucleus);GO:0005730(nucleolus);GO:0005737(cytoplasm);GO:0005789(endoplasmic reticulum membrane);GO:0005794(Golgi apparatus);GO:0005813(centrosome);GO:0005834(heterotrimeric G-protein complex);GO:0005886(plasma membrane);GO:0007165(…	04261(Adrenergic signaling in cardiomyocytes);04371(Apelin signaling pathway);04540(Gap junction);04914(Progesterone-mediated oocyte maturation);04916(Melanogenesis);04916(Melanogenesis)	G protein subunit alpha i3 [Source:NCBI gene;Acc:374097]	14.2334	19.3889	5.22433	30.4373	10.6289	36.9143	0.498158	-1.00533	0.0685493
MSTRG.126523	ZDHHC21	ENSGALT00000044120;ENSGALT00000085787	GO:0005783(endoplasmic reticulum);GO:0005794(Golgi apparatus);GO:0005886(plasma membrane);GO:0006612(protein targeting to membrane);GO:0016020(membrane);GO:0016021(integral component of membrane);GO:0016409(palmitoyltransferase activity);GO:0016740(transferase activity);GO:0016746(transferase activity, transferring acyl groups);GO:0018230(peptidyl-L-cysteine S-palmitoylation);GO:0018345(protein p…	NA	zinc finger DHHC-type containing 21 [Source:NCBI gene;Acc:427356]	8.89288	4.34498	7.09225	10.4078	15.3115	8.9216	0.586882	-0.768859	0.0685508
MSTRG.109712	INPP5F	ENSGALT00000015375	GO:0001921(positive regulation of receptor recycling);GO:0005737(cytoplasm);GO:0005769(early endosome);GO:0005905(clathrin-coated pit);GO:0008344(adult locomotory behavior);GO:0014898(cardiac muscle hypertrophy in response to stress);GO:0030424(axon);GO:0030425(dendrite);GO:0031161(phosphatidylinositol catabolic process);GO:0034595(phosphatidylinositol phosphate 5-phosphatase activity);GO:0034596…	00562(Inositol phosphate metabolism);04070(Phosphatidylinositol signaling system)	inositol polyphosphate-5-phosphatase F [Source:NCBI gene;Acc:423932]	4.47155	3.88935	5.06602	7.78415	7.4368	6.64093	0.61417	-0.70329	0.0685564
MSTRG.22684	CPEB1;AP3B2	ENSGALT00000003371;ENSGALT00000077812;ENSGALT00000082494	GO:0000900(translation repressor activity, mRNA regulatory element binding);GO:0003676(nucleic acid binding);GO:0003723(RNA binding);GO:0003730(mRNA 3'-UTR binding);GO:0005634(nucleus);GO:0005737(cytoplasm);GO:0006412(translation);GO:0006417(regulation of translation);GO:0008135(translation factor activity, RNA binding);GO:0043005(neuron projection);GO:0043022(ribosome binding);GO:0045182(transla…	04114(Oocyte meiosis);04914(Progesterone-mediated oocyte maturation);04142(Lysosome);04142(Lysosome)	cytoplasmic polyadenylation element binding protein 1 [Source:NCBI gene;Acc:415326];adaptor related protein complex 3 beta 2 subunit [Source:NCBI gene;Acc:769343]	1.30362	1.04183	0.976218	2.14751	1.18696	3.0376	0.521286	-0.939854	0.068564
MSTRG.63643	NCDN	ENSGALT00000003792;ENSGALT00000100010;ENSGALT00000091268	GO:0005829(cytosol);GO:0031175(neuron projection development);GO:0043005(neuron projection);GO:0045453(bone resorption);GO:0045453(bone resorption)	NA	neurochondrin [Source:NCBI gene;Acc:419633]	1.07853	1.68978	0.590422	2.4772	2.33389	2.22819	0.477141	-1.06751	0.0686007
MSTRG.60051	GDAP1L1	ENSGALT00000006862	GO:0005515(protein binding);GO:0016020(membrane);GO:0016021(integral component of membrane)	NA	ganglioside induced differentiation associated protein 1 like 1 [Source:NCBI gene;Acc:419201]	1.58782	1.4717	6.16036	1.10267	1.15939	1.37082	2.53789	1.34363	0.0686031
MSTRG.37822	TMEM132C	ENSGALT00000004281	GO:0016020(membrane);GO:0016021(integral component of membrane)	NA	transmembrane protein 132C [Source:NCBI gene;Acc:416809]	7.12378	10.4842	4.73755	13.5556	6.77302	20.4137	0.548461	-0.86654	0.0686389
MSTRG.129579	DHFR	ENSGALT00000044321	GO:0004146(dihydrofolate reductase activity);GO:0005737(cytoplasm);GO:0005739(mitochondrion);GO:0006729(tetrahydrobiopterin biosynthetic process);GO:0046654(tetrahydrofolate biosynthetic process);GO:0051000(positive regulation of nitric-oxide synthase activity);GO:0055114(oxidation-reduction process);GO:2000121(regulation of removal of superoxide radicals)	00670(One carbon pool by folate);00790(Folate biosynthesis)	dihydrofolate reductase [Source:NCBI gene;Acc:427317]	14.3044	9.32856	7.46724	5.71712	5.31609	5.93334	1.83303	0.874228	0.0688698
MSTRG.62977	GNLY	ENSGALT00000078625	GO:0006629(lipid metabolic process);GO:0042742(defense response to bacterium)	NA	granulysin [Source:NCBI gene;Acc:693257]	0.0001	0.0001	0.0001	0.0001	1.86971	1.92967	7.89582e-05	-13.6286	0.0690912
MSTRG.95208	EXOC6B	ENSGALT00000107314;ENSGALT00000025939;ENSGALT00000103583	GO:0000145(exocyst);GO:0006887(exocytosis);GO:0006893(Golgi to plasma membrane transport);GO:0006904(vesicle docking involved in exocytosis);GO:0016020(membrane);GO:0016020(membrane)	NA	exocyst complex component 6B [Source:NCBI gene;Acc:422955]	2.41156	2.44892	0.92253	3.78094	3.4728	4.5726	0.488994	-1.03211	0.0691564
MSTRG.58926	gga-mir-30b	MSTRG.58926.1	NA	NA		4.54207	3.32888	4.23908	2.34505	2.78854	1.76061	1.75655	0.812747	0.0694284
MSTRG.25616	ENSGALG00000008297	ENSGALT00000105318;ENSGALT00000091517;ENSGALT00000013511	GO:0001755(neural crest cell migration);GO:0005515(protein binding);GO:0005615(extracellular space);GO:0005886(plasma membrane);GO:0005887(integral component of plasma membrane);GO:0016020(membrane);GO:0016021(integral component of membrane);GO:0030215(semaphorin receptor binding);GO:0030335(positive regulation of cell migration);GO:0038191(neuropilin binding);GO:0045499(chemorepellent activity);…	NA	semaphorin 4B [Source:NCBI gene;Acc:415582]	2.27116	3.46009	1.89062	1.13097	0.913075	1.75269	2.00748	1.00539	0.0695109
MSTRG.44926	MASTL	ENSGALT00000012133	GO:0000086(G2/M transition of mitotic cell cycle);GO:0000166(nucleotide binding);GO:0000278(mitotic cell cycle);GO:0004672(protein kinase activity);GO:0004674(protein serine/threonine kinase activity);GO:0005524(ATP binding);GO:0005634(nucleus);GO:0005654(nucleoplasm);GO:0005813(centrosome);GO:0006468(protein phosphorylation);GO:0007147(female meiosis II);GO:0016301(kinase activity);GO:0016310(ph…	NA	microtubule associated serine/threonine kinase like [Source:NCBI gene;Acc:420487]	4.66822	3.86032	3.23684	7.02047	7.01624	6.05782	0.585501	-0.772255	0.0696244
MSTRG.22546	TRIM3	ENSGALT00000105842;ENSGALT00000101505;ENSGALT00000051997	GO:0004842(ubiquitin-protein transferase activity);GO:0005515(protein binding);GO:0005622(intracellular);GO:0005737(cytoplasm);GO:0008270(zinc ion binding);GO:0016567(protein ubiquitination);GO:0046872(metal ion binding);GO:0061630(ubiquitin protein ligase activity);GO:0061630(ubiquitin protein ligase activity)	NA	tripartite motif containing 3 [Source:NCBI gene;Acc:425131]	1.31537	0.844578	0.614977	0.907513	1.83238	3.94616	0.415032	-1.26871	0.0701774
MSTRG.37268	DCUN1D3	ENSGALT00000080718	GO:0000151(ubiquitin ligase complex);GO:0010225(response to UV-C);GO:0010332(response to gamma radiation);GO:0030308(negative regulation of cell growth);GO:0031624(ubiquitin conjugating enzyme binding);GO:0032182(ubiquitin-like protein binding);GO:0043065(positive regulation of apoptotic process);GO:0045116(protein neddylation);GO:0048471(perinuclear region of cytoplasm);GO:0051443(positive regul…	NA	defective in cullin neddylation 1 domain containing 3 [Source:NCBI gene;Acc:427002]	4.05987	1.33756	5.103	4.93514	9.51251	5.45339	0.527633	-0.922395	0.0702607
MSTRG.71476	BABAM2	ENSGALT00000016306	GO:0000152(nuclear ubiquitin ligase complex);GO:0005164(tumor necrosis factor receptor binding);GO:0005634(nucleus);GO:0005737(cytoplasm);GO:0005829(cytosol);GO:0006281(DNA repair);GO:0006302(double-strand break repair);GO:0006325(chromatin organization);GO:0006915(apoptotic process);GO:0006974(cellular response to DNA damage stimulus);GO:0007049(cell cycle);GO:0010212(response to ionizing radiat…	03440(Homologous recombination)	BRISC and BRCA1 A complex member 2 [Source:NCBI gene;Acc:421417]	18.3445	7.9561	8.41572	22.4006	20.6163	17.0831	0.577643	-0.791751	0.0702878
MSTRG.973	SEMA3D	ENSGALT00000010596;ENSGALT00000095428	GO:0001755(neural crest cell migration);GO:0005515(protein binding);GO:0005576(extracellular region);GO:0005615(extracellular space);GO:0005887(integral component of plasma membrane);GO:0007275(multicellular organism development);GO:0007399(nervous system development);GO:0030154(cell differentiation);GO:0030215(semaphorin receptor binding);GO:0030335(positive regulation of cell migration);GO:0038…	NA	semaphorin 3D [Source:NCBI gene;Acc:396332]	6.78526	6.97069	3.10123	9.36741	10.3532	10.4195	0.559293	-0.838325	0.0705644
MSTRG.92428	APBB2;ENSGALG00000014262	ENSGALT00000097262;ENSGALT00000097243;ENSGALT00000098567;ENSGALT00000023068	GO:0001540(amyloid-beta binding);GO:0001764(neuron migration);GO:0005515(protein binding);GO:0005634(nucleus);GO:0005737(cytoplasm);GO:0006355(regulation of transcription, DNA-templated);GO:0007050(cell cycle arrest);GO:0007411(axon guidance);GO:0008134(transcription factor binding);GO:0030198(extracellular matrix organization);GO:0030308(negative regulation of cell growth);GO:0043065(positive re…	NA	amyloid beta precursor protein binding family B member 2 [Source:NCBI gene;Acc:422781]	5.44773	7.12612	2.41462	8.98696	8.19945	8.99072	0.572579	-0.804454	0.070723
MSTRG.51817	ADCY2	ENSGALT00000021320;ENSGALT00000104388	GO:0000166(nucleotide binding);GO:0004016(adenylate cyclase activity);GO:0005524(ATP binding);GO:0005737(cytoplasm);GO:0005886(plasma membrane);GO:0005887(integral component of plasma membrane);GO:0006171(cAMP biosynthetic process);GO:0007189(adenylate cyclase-activating G protein-coupled receptor signaling pathway);GO:0009190(cyclic nucleotide biosynthetic process);GO:0016020(membrane);GO:001602…	00230(Purine metabolism);04020(Calcium signaling pathway);04114(Oocyte meiosis);04261(Adrenergic signaling in cardiomyocytes);04270(Vascular smooth muscle contraction);04371(Apelin signaling pathway);04540(Gap junction);04912(GnRH signaling pathway);04914(Progesterone-mediated oocyte maturation);04916(Melanogenesis);04916(Melanogenesis)	adenylate cyclase 2 [Source:NCBI gene;Acc:420935]	0.132977	0.17079	0.0001	0.709577	0.92659	0.627514	0.134236	-2.89716	0.0708343
MSTRG.103557	ENSGALG00000041565;ENSGALG00000011639	ENSGALT00000068364;ENSGALT00000019018;ENSGALT00000050973	GO:0005515(protein binding)	NA	centrosomal protein 170B [Source:NCBI gene;Acc:423494]	7.71504	8.50466	3.63559	10.8496	8.61156	14.3012	0.588089	-0.765894	0.0709633
MSTRG.43816	WDR86	ENSGALT00000054972	GO:0005515(protein binding)	NA	WD repeat domain 86 [Source:NCBI gene;Acc:770203]	7.11076	7.29215	9.16552	6.81106	2.52753	4.19484	1.7415	0.800327	0.0712
MSTRG.89567	PPEF2	ENSGALT00000018790	GO:0004721(phosphoprotein phosphatase activity);GO:0004722(protein serine/threonine phosphatase activity);GO:0005506(iron ion binding);GO:0005509(calcium ion binding);GO:0005515(protein binding);GO:0005634(nucleus);GO:0005829(cytosol);GO:0006470(protein dephosphorylation);GO:0010801(negative regulation of peptidyl-threonine phosphorylation);GO:0016787(hydrolase activity);GO:0030145(manganese ion …	NA	protein phosphatase with EF-hand domain 2 [Source:NCBI gene;Acc:422640]	1.24328	0.949432	0.959845	1.94882	1.91079	2.05458	0.53305	-0.907658	0.0712041
MSTRG.5341	ELK3	ENSGALT00000076238	GO:0000122(negative regulation of transcription by RNA polymerase II);GO:0000978(RNA polymerase II proximal promoter sequence-specific DNA binding);GO:0000981(DNA-binding transcription factor activity, RNA polymerase II-specific);GO:0001227(DNA-binding transcription repressor activity, RNA polymerase II-specific);GO:0001228(DNA-binding transcription activator activity, RNA polymerase II-specific)…	NA	ELK3, ETS transcription factor [Source:NCBI gene;Acc:417919]	6.73819	4.80643	5.89425	11.1987	7.53763	10.4709	0.597075	-0.744017	0.071287
MSTRG.104304	FRMD6	ENSGALT00000096592;ENSGALT00000020205	GO:0003383(apical constriction);GO:0005856(cytoskeleton);GO:0031032(actomyosin structure organization);GO:0032970(regulation of actin filament-based process);GO:0034613(cellular protein localization);GO:0043296(apical junction complex);GO:0043296(apical junction complex)	NA	FERM domain containing 6 [Source:NCBI gene;Acc:428930]	0.898349	1.26305	1.84902	4.11472	1.26908	2.81785	0.488977	-1.03216	0.0712953
MSTRG.4899	ENSGALG00000049176	ENSGALT00000018221	GO:0005634(nucleus);GO:0005813(centrosome);GO:0060271(cilium assembly)	NA		3.02804	1.45959	2.21767	3.88411	4.50801	3.5268	0.562576	-0.82988	0.0713483
MSTRG.66973	MIER2	ENSGALT00000097374;ENSGALT00000001662	GO:0000122(negative regulation of transcription by RNA polymerase II);GO:0001103(RNA polymerase II repressing transcription factor binding);GO:0003677(DNA binding);GO:0003714(transcription corepressor activity);GO:0004407(histone deacetylase activity);GO:0005634(nucleus);GO:0005654(nucleoplasm);GO:0005737(cytoplasm);GO:0016575(histone deacetylation);GO:0032991(protein-containing complex);GO:00428…	NA	MIER family member 2 [Source:NCBI gene;Acc:770192]	1.88791	0.750942	1.3291	2.28686	2.13919	3.20608	0.519901	-0.943692	0.0713757
MSTRG.63832	ZBTB8B	ENSGALT00000005390;ENSGALT00000095052;ENSGALT00000100942;ENSGALT00000105742	GO:0003676(nucleic acid binding);GO:0005515(protein binding);GO:0005515(protein binding)	NA	zinc finger and BTB domain containing 8B [Source:NCBI gene;Acc:419659]	0.74214	0.987836	1.32807	3.18523	0.662641	3.09245	0.44062	-1.18239	0.0713866
MSTRG.30135	BRPF1;OGG1	ENSGALT00000071760;ENSGALT00000058416;ENSGALT00000010758	GO:0003676(nucleic acid binding);GO:0005515(protein binding);GO:0005544(calcium-dependent phospholipid binding);GO:0005634(nucleus);GO:0005737(cytoplasm);GO:0005829(cytosol);GO:0005886(plasma membrane);GO:0043966(histone H3 acetylation);GO:0043972(histone H3-K23 acetylation);GO:0043994(histone acetyltransferase activity (H3-K23 specific));GO:0045893(positive regulation of transcription, DNA-templ…	03410(Base excision repair)	copine family member 9 [Source:NCBI gene;Acc:101747832];8-oxoguanine DNA glycosylase [Source:NCBI gene;Acc:771001]	0.797291	0.918069	0.573558	1.84762	0.709582	1.9866	0.503746	-0.989232	0.0715245
MSTRG.115396	ZEB2	ENSGALT00000100475;ENSGALT00000094095;ENSGALT00000047638;ENSGALT00000050617	GO:0000122(negative regulation of transcription by RNA polymerase II);GO:0000790(nuclear chromatin);GO:0001227(DNA-binding transcription repressor activity, RNA polymerase II-specific);GO:0001228(DNA-binding transcription activator activity, RNA polymerase II-specific);GO:0001755(neural crest cell migration);GO:0001756(somitogenesis);GO:0001843(neural tube closure);GO:0003676(nucleic acid binding…	NA	zinc finger E-box binding homeobox 2 [Source:NCBI gene;Acc:424306]	4.69149	5.70242	3.18404	8.05119	6.34344	8.15823	0.60205	-0.732046	0.0715264
MSTRG.127613	DAPK1	ENSGALT00000063640;ENSGALT00000103936;ENSGALT00000020586;ENSGALT00000064468	GO:0004672(protein kinase activity);GO:0004674(protein serine/threonine kinase activity);GO:0004683(calmodulin-dependent protein kinase activity);GO:0005515(protein binding);GO:0005516(calmodulin binding);GO:0005524(ATP binding);GO:0005634(nucleus);GO:0005737(cytoplasm);GO:0005886(plasma membrane);GO:0006468(protein phosphorylation);GO:0006915(apoptotic process);GO:0007165(signal transduction);GO…	04140(Autophagy - animal);04140(Autophagy - animal)	death-associated protein kinase 1 [Source:NCBI gene;Acc:431670]	11.4087	9.15742	9.79723	15.2681	18.3347	14.1138	0.636325	-0.652164	0.071895
MSTRG.100985	BRMS1L	ENSGALT00000016417	NA	NA	BRMS1 like transcriptional repressor [Source:NCBI gene;Acc:423328]	11.6314	1.74745	5.71211	2.82974	2.5297	3.59154	2.13284	1.09277	0.0719185
MSTRG.39654	ENSGALG00000048936;ENSGALG00000052726	ENSGALT00000078990;ENSGALT00000091607	GO:0005815(microtubule organizing center);GO:0005815(microtubule organizing center)	NA		3.59272	3.78532	1.67528	5.74924	4.78253	5.66449	0.558976	-0.839141	0.0721713
MSTRG.87589	ABHD18	ENSGALT00000089384;ENSGALT00000099144;ENSGALT00000016584	NA	NA	abhydrolase domain containing 18 [Source:NCBI gene;Acc:422499]	2.94463	2.3666	2.11276	4.45188	4.38467	3.61826	0.596074	-0.746436	0.0725415
MSTRG.82314	PPP1R14B	ENSGALT00000104566;ENSGALT00000103079;ENSGALT00000099543	GO:0005737(cytoplasm);GO:0042325(regulation of phosphorylation);GO:0042325(regulation of phosphorylation)	NA	protein phosphatase 1 regulatory subunit 14C-like [Source:NCBI gene;Acc:107051531]	10.3959	16.9309	23.8247	9.35655	7.6065	12.0442	1.7634	0.818359	0.0726244
MSTRG.123539	ENSGALG00000055022;ENSGALG00000033770	ENSGALT00000105416;ENSGALT00000067344	GO:0000978(RNA polymerase II proximal promoter sequence-specific DNA binding);GO:0003700(DNA-binding transcription factor activity);GO:0005634(nucleus);GO:0005667(transcription factor complex);GO:0042803(protein homodimerization activity);GO:0043425(bHLH transcription factor binding);GO:0045666(positive regulation of neuron differentiation);GO:0045944(positive regulation of transcription by RNA p…	NA		2.69862	5.63056	2.482	1.73671	0.787785	0.880156	3.17542	1.66695	0.0730226
MSTRG.45634	DBF4;RUNDC3B	ENSGALT00000093969;ENSGALT00000099497;ENSGALT00000093076;ENSGALT00000099580;ENSGALT00000096249;ENSGALT00000092263;ENSGALT00000014574;ENSGALT00000014563	GO:0003676(nucleic acid binding);GO:0005634(nucleus);GO:0008270(zinc ion binding);GO:0016604(nuclear body);GO:0019901(protein kinase binding);GO:0031431(Dbf4-dependent protein kinase complex);GO:0043539(protein serine/threonine kinase activator activity);GO:0045740(positive regulation of DNA replication);GO:0071902(positive regulation of protein serine/threonine kinase activity);GO:0071902(positi…	04110(Cell cycle);04110(Cell cycle)	DBF4 zinc finger [Source:NCBI gene;Acc:420536];RUN domain containing 3B [Source:NCBI gene;Acc:420535]	7.00188	4.13403	2.8537	9.49935	8.34431	6.67108	0.570661	-0.809294	0.0732948
MSTRG.7475	AEBP2	ENSGALT00000103349;ENSGALT00000070952	GO:0000122(negative regulation of transcription by RNA polymerase II);GO:0000978(RNA polymerase II proximal promoter sequence-specific DNA binding);GO:0001227(DNA-binding transcription repressor activity, RNA polymerase II-specific);GO:0003676(nucleic acid binding);GO:0003677(DNA binding);GO:0003714(transcription corepressor activity);GO:0005634(nucleus);GO:0006355(regulation of transcription, DN…	NA	AE binding protein 2 [Source:NCBI gene;Acc:418184]	5.02265	3.88718	2.84204	6.71431	7.17145	5.64292	0.601775	-0.732704	0.0733651
MSTRG.32384	TTC1	ENSGALT00000085992	GO:0005515(protein binding);GO:0005829(cytosol)	NA	tetratricopeptide repeat domain 1 [Source:NCBI gene;Acc:416152]	10.8735	9.46475	9.0484	14.5793	15.9396	18.0028	0.605641	-0.723466	0.0734881
MSTRG.39657	SLC25A25	ENSGALT00000103087;ENSGALT00000108095;ENSGALT00000008172	GO:0002021(response to dietary excess);GO:0005347(ATP transmembrane transporter activity);GO:0005509(calcium ion binding);GO:0005739(mitochondrion);GO:0005743(mitochondrial inner membrane);GO:0014823(response to activity);GO:0015867(ATP transport);GO:0016020(membrane);GO:0016021(integral component of membrane);GO:0022857(transmembrane transporter activity);GO:0032094(response to food);GO:0035264(…	NA	solute carrier family 25 member 25 [Source:NCBI gene;Acc:417230]	1.1083	2.75989	2.46879	3.27633	2.05021	7.35655	0.49964	-1.00104	0.0748084
MSTRG.53947	ARHGAP28	ENSGALT00000090158;ENSGALT00000023805	GO:0005096(GTPase activator activity);GO:0005737(cytoplasm);GO:0007165(signal transduction);GO:0016020(membrane);GO:0016021(integral component of membrane);GO:0030833(regulation of actin filament polymerization);GO:0032956(regulation of actin cytoskeleton organization);GO:0043547(positive regulation of GTPase activity);GO:0051056(regulation of small GTPase mediated signal transduction);GO:0051497…	NA	Rho GTPase activating protein 28 [Source:NCBI gene;Acc:421053]	14.0711	9.27089	8.51095	15.5228	15.434	20.0515	0.624467	-0.679302	0.0749836
MSTRG.113935	PECR	ENSGALT00000018735	GO:0005102(signaling receptor binding);GO:0005739(mitochondrion);GO:0005777(peroxisome);GO:0019166(trans-2-enoyl-CoA reductase (NADPH) activity);GO:0033306(phytol metabolic process);GO:0055114(oxidation-reduction process)	04146(Peroxisome)	peroxisomal trans-2-enoyl-CoA reductase [Source:NCBI gene;Acc:424224]	5.07831	2.88399	2.43915	8.78081	7.16138	5.08131	0.494753	-1.01522	0.0751969
MSTRG.65729	OLFML3	ENSGALT00000003025	GO:0005576(extracellular region);GO:0007275(multicellular organism development)	NA	olfactomedin like 3 [Source:NCBI gene;Acc:419882]	2.83988	8.38173	1.80262	0.833073	1.64314	2.23336	2.76548	1.46753	0.0753269
MSTRG.94158	ENSGALG00000052043;DOK7;ENSGALG00000047606	ENSGALT00000096635;ENSGALT00000025174;ENSGALT00000096843	GO:0005634(nucleus);GO:0005654(nucleoplasm);GO:0005739(mitochondrion);GO:0019901(protein kinase binding);GO:0061098(positive regulation of protein tyrosine kinase activity)	NA	docking protein 7 [Source:HGNC Symbol;Acc:HGNC:26594]	0.932725	0.0132056	0.578663	1.47707	2.32728	1.36895	0.294704	-1.76266	0.0754485
MSTRG.72027	CDC42EP3	ENSGALT00000106244;ENSGALT00000093337;ENSGALT00000017169	GO:0005737(cytoplasm);GO:0005886(plasma membrane);GO:0007266(Rho protein signal transduction);GO:0008360(regulation of cell shape);GO:0015629(actin cytoskeleton);GO:0017049(GTP-Rho binding);GO:0030838(positive regulation of actin filament polymerization);GO:0031274(positive regulation of pseudopodium assembly);GO:0031274(positive regulation of pseudopodium assembly)	NA	CDC42 effector protein 3 [Source:NCBI gene;Acc:428577]	15.3125	12.4067	19.2151	22.8374	27.4667	23.0142	0.640145	-0.64353	0.0755091
MSTRG.30132	ENSGALG00000054572	ENSGALT00000106279	GO:0030368(interleukin-17 receptor activity)	NA		0.55055	0.929293	0.678098	2.00137	2.88462	1.31252	0.348139	-1.52227	0.0755458
MSTRG.129047	PHAX	ENSGALT00000023680	GO:0005634(nucleus);GO:0005654(nucleoplasm);GO:0005737(cytoplasm);GO:0005813(centrosome);GO:0006408(snRNA export from nucleus)	03013(RNA transport)	phosphorylated adaptor for RNA export [Source:NCBI gene;Acc:427124]	6.68342	6.63967	7.06547	9.03515	11.8245	11.3002	0.633975	-0.657502	0.075566
MSTRG.224	FBH1	ENSGALT00000092270;ENSGALT00000013264	GO:0000166(nucleotide binding);GO:0000724(double-strand break repair via homologous recombination);GO:0000725(recombinational repair);GO:0000737(DNA catabolic process, endonucleolytic);GO:0000785(chromatin);GO:0001934(positive regulation of protein phosphorylation);GO:0003677(DNA binding);GO:0003678(DNA helicase activity);GO:0003690(double-stranded DNA binding);GO:0003697(single-stranded DNA bind…	NA	F-box DNA helicase 1 [Source:NCBI gene;Acc:416687]	3.17807	0.656629	0.675614	4.45364	2.70178	3.27338	0.432486	-1.20927	0.0756221
MSTRG.62432	CDC42	ENSGALT00000094662;ENSGALT00000049495;ENSGALT00000052911;ENSGALT00000034897	GO:0000166(nucleotide binding);GO:0000322(storage vacuole);GO:0003161(cardiac conduction system development);GO:0003924(GTPase activity);GO:0005525(GTP binding);GO:0005622(intracellular);GO:0005737(cytoplasm);GO:0005829(cytosol);GO:0005886(plasma membrane);GO:0005911(cell-cell junction);GO:0005912(adherens junction);GO:0005938(cell cortex);GO:0006897(endocytosis);GO:0006911(phagocytosis, engulfme…	04010(MAPK signaling pathway);04144(Endocytosis);04370(VEGF signaling pathway);04510(Focal adhesion);04520(Adherens junction);04530(Tight junction);04810(Regulation of actin cytoskeleton);04912(GnRH signaling pathway);04933(AGE-RAGE signaling pathway in diabetic complications);05132(Salmonella infection);05132(Salmonella infection)	cell division cycle 42 [Source:NCBI gene;Acc:395917]	19.3835	17.8311	26.1671	23.4816	67.1351	21.2782	0.566439	-0.820007	0.0756618
MSTRG.28913	PCBP4	ENSGALT00000044247	GO:0003676(nucleic acid binding);GO:0003723(RNA binding);GO:0003730(mRNA 3'-UTR binding);GO:0005829(cytosol);GO:0043488(regulation of mRNA stability)	NA	poly(rC)-binding protein 4-like [Source:NCBI gene;Acc:100859674]	0.545627	0.0001	0.0001	1.69984	1.67538	2.11013	0.0995064	-3.32907	0.0756637
MSTRG.93555	ENSGALG00000048496;ENSGALG00000026470	ENSGALT00000097508;ENSGALT00000092297;ENSGALT00000097008;ENSGALT00000045755	NA	NA	biorientation of chromosomes in cell division 1 like 1 [Source:NCBI gene;Acc:422838]	4.11314	6.54528	4.72794	6.81142	9.96695	7.80539	0.625875	-0.676054	0.0757081
MSTRG.54819	DTNA	ENSGALT00000049758;ENSGALT00000058454;ENSGALT00000024545;ENSGALT00000052422;ENSGALT00000082942;ENSGALT00000074821	GO:0005737(cytoplasm);GO:0008270(zinc ion binding);GO:0032991(protein-containing complex);GO:0046872(metal ion binding);GO:0046872(metal ion binding)	NA	dystrobrevin alpha [Source:NCBI gene;Acc:421104]	13.0059	11.7729	8.99172	6.96247	6.43775	7.60475	1.60774	0.685035	0.0757182
MSTRG.99262	NDUFAF1	ENSGALT00000013981	GO:0005739(mitochondrion);GO:0005747(mitochondrial respiratory chain complex I);GO:0005829(cytosol);GO:0006120(mitochondrial electron transport, NADH to ubiquinone);GO:0032981(mitochondrial respiratory chain complex I assembly);GO:0051082(unfolded protein binding)	NA	NADH:ubiquinone oxidoreductase complex assembly factor 1 [Source:NCBI gene;Acc:423214]	10.3435	7.03712	11.4037	15.2049	13.1176	18.5141	0.614568	-0.702354	0.0757638
MSTRG.67962	STON1	ENSGALT00000014803;ENSGALT00000096675;ENSGALT00000104824;ENSGALT00000103069;ENSGALT00000095612	GO:0006897(endocytosis);GO:0030100(regulation of endocytosis);GO:0030100(regulation of endocytosis)	NA	stonin 1 [Source:NCBI gene;Acc:100534590]	1.93355	2.19447	2.85599	0.64926	1.43573	1.61134	1.88944	0.917961	0.0758263
MSTRG.108579	ADGRA1	ENSGALT00000011413;ENSGALT00000096587	GO:0004888(transmembrane signaling receptor activity);GO:0004930(G protein-coupled receptor activity);GO:0005515(protein binding);GO:0007165(signal transduction);GO:0007166(cell surface receptor signaling pathway);GO:0007186(G protein-coupled receptor signaling pathway);GO:0016020(membrane);GO:0016021(integral component of membrane);GO:0016021(integral component of membrane)	NA	adhesion G protein-coupled receptor A1 [Source:NCBI gene;Acc:423825]	0.706853	0.673807	1.17633	2.45647	1.33467	1.81382	0.456201	-1.13226	0.0758958
MSTRG.106338	CCDC6	ENSGALT00000049289	GO:0005829(cytosol)	NA	coiled-coil domain containing 6 [Source:NCBI gene;Acc:423666]	3.90684	4.94785	3.92483	5.03752	11.2521	5.0124	0.59992	-0.737158	0.0762046
MSTRG.115626	GPD2	ENSGALT00000099425;ENSGALT00000020486;ENSGALT00000099269	GO:0004367(glycerol-3-phosphate dehydrogenase [NAD+] activity);GO:0004368(glycerol-3-phosphate dehydrogenase (quinone) activity);GO:0005509(calcium ion binding);GO:0005739(mitochondrion);GO:0006072(glycerol-3-phosphate metabolic process);GO:0006094(gluconeogenesis);GO:0009331(glycerol-3-phosphate dehydrogenase complex);GO:0016491(oxidoreductase activity);GO:0035264(multicellular organism growth);…	00564(Glycerophospholipid metabolism);00564(Glycerophospholipid metabolism)	glycerol-3-phosphate dehydrogenase 2 [Source:NCBI gene;Acc:424321]	13.8819	13.8981	4.55467	5.13334	8.51219	4.36493	1.79533	0.844247	0.0764406
MSTRG.1026	SEMA3E	ENSGALT00000080606	GO:0001569(branching involved in blood vessel morphogenesis);GO:0001953(negative regulation of cell-matrix adhesion);GO:0002040(sprouting angiogenesis);GO:0005515(protein binding);GO:0008360(regulation of cell shape);GO:0016525(negative regulation of angiogenesis);GO:0030215(semaphorin receptor binding);GO:0050808(synapse organization);GO:0071526(semaphorin-plexin signaling pathway);GO:2000249(re…	NA	semaphorin 3E [Source:NCBI gene;Acc:374089]	0.0001	0.0001	0.0001	0.0522709	0.290249	0.359101	0.000427581	-11.1915	0.0765724
MSTRG.121671	LAMP3;MCF2L2	ENSGALT00000014248;ENSGALT00000061761;ENSGALT00000048841	GO:0005764(lysosome);GO:0005765(lysosomal membrane);GO:0016020(membrane);GO:0016021(integral component of membrane);GO:0005085(guanyl-nucleotide exchange factor activity);GO:0005089(Rho guanyl-nucleotide exchange factor activity);GO:0005515(protein binding);GO:0035023(regulation of Rho protein signal transduction);GO:0035556(intracellular signal transduction);GO:0035556(intracellular signal trans…	04142(Lysosome)	lysosomal associated membrane protein 3 [Source:NCBI gene;Acc:424961];MCF.2 cell line derived transforming sequence-like 2 [Source:NCBI gene;Acc:424959]	1.45578	1.43131	1.37004	1.47514	2.05179	4.08965	0.558929	-0.839264	0.0767853
MSTRG.87322	TMEM184C	ENSGALT00000016272	GO:0016020(membrane);GO:0016021(integral component of membrane)	NA	transmembrane protein 184C [Source:NCBI gene;Acc:422469]	9.58609	3.0925	5.34961	10.4286	10.4499	11.6894	0.553557	-0.853197	0.0771825
MSTRG.112116	CLK1	ENSGALT00000095126;ENSGALT00000105779;ENSGALT00000044904;ENSGALT00000092299	GO:0004672(protein kinase activity);GO:0004674(protein serine/threonine kinase activity);GO:0004713(protein tyrosine kinase activity);GO:0005524(ATP binding);GO:0005634(nucleus);GO:0006468(protein phosphorylation);GO:0018105(peptidyl-serine phosphorylation);GO:0018107(peptidyl-threonine phosphorylation);GO:0018108(peptidyl-tyrosine phosphorylation);GO:0043484(regulation of RNA splicing);GO:004677…	NA	CDC like kinase 1 [Source:NCBI gene;Acc:100858576]	10.2905	3.80582	3.89405	11.7262	14.6801	7.24193	0.53466	-0.903306	0.077188
MSTRG.67191	IFI30	ENSGALT00000054220	NA	NA	IFI30, lysosomal thiol reductase [Source:NCBI gene;Acc:420129]	1.55827	0.938066	0.0001	0.0001	0.0001	0.0001	8321.47	13.0226	0.0772442
MSTRG.50442	BLOC1S5	ENSGALT00000020852;ENSGALT00000102999;ENSGALT00000087415	GO:0005634(nucleus);GO:0005737(cytoplasm);GO:0008285(negative regulation of cell population proliferation);GO:0017101(aminoacyl-tRNA synthetase multienzyme complex);GO:0030133(transport vesicle);GO:0031083(BLOC-1 complex);GO:0043065(positive regulation of apoptotic process);GO:0043517(positive regulation of DNA damage response, signal transduction by p53 class mediator);GO:1990830(cellular respon…	NA	eukaryotic translation elongation factor 1 epsilon 1 [Source:NCBI gene;Acc:420865]	9.30017	5.20312	7.55109	11.6246	10.5495	13.5754	0.616914	-0.696858	0.077438
MSTRG.68664	APLF	ENSGALT00000014234;ENSGALT00000103564	GO:0000012(single strand break repair);GO:0000166(nucleotide binding);GO:0003906(DNA-(apurinic or apyrimidinic site) endonuclease activity);GO:0004520(endodeoxyribonuclease activity);GO:0005515(protein binding);GO:0005634(nucleus);GO:0005654(nucleoplasm);GO:0006302(double-strand break repair);GO:0006974(cellular response to DNA damage stimulus);GO:0008408(3'-5' exonuclease activity);GO:0035861(si…	NA	aprataxin and PNKP like factor [Source:NCBI gene;Acc:421264]	2.44432	4.1301	1.85308	0.511712	1.57847	1.48044	2.36023	1.23893	0.0778419
MSTRG.67200	ENSGALG00000027696	ENSGALT00000044959	GO:0005515(protein binding)	NA	ectoderm-neural cortex protein 1-like [Source:NCBI gene;Acc:425795]	0.374319	0.195756	0.0001	2.06144	1.34943	1.09406	0.126567	-2.98203	0.0778882
MSTRG.52274	RPRD1A	ENSGALT00000031000;ENSGALT00000021433	GO:0016591(RNA polymerase II, holoenzyme);GO:0070940(dephosphorylation of RNA polymerase II C-terminal domain);GO:0070940(dephosphorylation of RNA polymerase II C-terminal domain)	NA	regulation of nuclear pre-mRNA domain containing 1A [Source:NCBI gene;Acc:420953]	2.7735	2.21885	2.63603	3.51795	5.61457	4.3376	0.566319	-0.820314	0.0782498
MSTRG.48548	ENSGALG00000038978	ENSGALT00000072398;ENSGALT00000091975	GO:0000030(mannosyltransferase activity);GO:0005637(nuclear inner membrane);GO:0016020(membrane);GO:0016021(integral component of membrane);GO:0018406(protein C-linked glycosylation via 2'-alpha-mannosyl-L-tryptophan);GO:0018406(protein C-linked glycosylation via 2'-alpha-mannosyl-L-tryptophan)	NA	dpy-19 like C-mannosyltransferase 1 [Source:NCBI gene;Acc:420743]	7.87874	6.11723	5.4773	6.64491	12.7069	13.463	0.593428	-0.752854	0.0787972
MSTRG.10075	CCDC80	ENSGALT00000024512;ENSGALT00000085468	NA	NA	coiled-coil domain containing 80 [Source:NCBI gene;Acc:395074]	24.2477	15.2408	14.5991	27.3262	25.8176	33.97	0.620884	-0.687603	0.0789668
MSTRG.63920	PEA15L1;ENSGALG00000054604	ENSGALT00000091112;ENSGALT00000097853	GO:0000077(DNA damage checkpoint);GO:0005515(protein binding);GO:0005634(nucleus);GO:0005829(cytosol);GO:0042981(regulation of apoptotic process);GO:0046325(negative regulation of glucose import);GO:1902042(negative regulation of extrinsic apoptotic signaling pathway via death domain receptors);GO:1902043(positive regulation of extrinsic apoptotic signaling pathway via death domain receptors);GO:…	NA	astrocytic phosphoprotein PEA-15-like 1 [Source:NCBI gene;Acc:107049501]	1.06068	1.38876	0.591953	3.38607	0.932689	3.10701	0.409572	-1.28781	0.0790109
MSTRG.63392	PTPRU	ENSGALT00000075185;ENSGALT00000092116;ENSGALT00000078187;ENSGALT00000093583	GO:0004721(phosphoprotein phosphatase activity);GO:0004725(protein tyrosine phosphatase activity);GO:0005515(protein binding);GO:0005911(cell-cell junction);GO:0006470(protein dephosphorylation);GO:0008013(beta-catenin binding);GO:0008285(negative regulation of cell population proliferation);GO:0016020(membrane);GO:0016021(integral component of membrane);GO:0016311(dephosphorylation);GO:0016787(h…	NA	protein tyrosine phosphatase, receptor type U [Source:NCBI gene;Acc:395153]	1.94415	3.68817	1.42803	0.52062	0.792555	1.94595	2.16633	1.11525	0.0792201
MSTRG.6333	NFYB	ENSGALT00000067128;ENSGALT00000101106;ENSGALT00000090973;ENSGALT00000070018;ENSGALT00000054743;ENSGALT00000065187;ENSGALT00000076295	GO:0000980(RNA polymerase II distal enhancer sequence-specific DNA binding);GO:0003677(DNA binding);GO:0003700(DNA-binding transcription factor activity);GO:0005634(nucleus);GO:0006355(regulation of transcription, DNA-templated);GO:0016602(CCAAT-binding factor complex);GO:0032993(protein-DNA complex);GO:0043565(sequence-specific DNA binding);GO:0044212(transcription regulatory region DNA binding)…	NA	Nuclear transcription factor Y subunit beta [Source:UniProtKB/Swiss-Prot;Acc:P25207]	1.94381	0.878982	1.19754	2.13073	3.49854	2.30469	0.506725	-0.980726	0.0795651
MSTRG.124669	HMGCS1	ENSGALT00000083486;ENSGALT00000080900;ENSGALT00000023982	GO:0003824(catalytic activity);GO:0004421(hydroxymethylglutaryl-CoA synthase activity);GO:0006629(lipid metabolic process);GO:0006694(steroid biosynthetic process);GO:0008202(steroid metabolic process);GO:0008299(isoprenoid biosynthetic process);GO:0016126(sterol biosynthetic process);GO:0016740(transferase activity);GO:0042803(protein homodimerization activity);GO:0042803(protein homodimerizatio…	00072(Synthesis and degradation of ketone bodies);00280(Valine, leucine and isoleucine degradation);00650(Butanoate metabolism);00900(Terpenoid backbone biosynthesis);00900(Terpenoid backbone biosynthesis)	3-hydroxy-3-methylglutaryl-CoA synthase 1 [Source:NCBI gene;Acc:396379]	49.368	85.1904	48.1733	26.1382	25.3727	56.2319	1.696	0.762137	0.0796425
MSTRG.47024	GALNT15	ENSGALT00000062515;ENSGALT00000018324	GO:0000139(Golgi membrane);GO:0005794(Golgi apparatus);GO:0006486(protein glycosylation);GO:0016020(membrane);GO:0016021(integral component of membrane);GO:0016740(transferase activity);GO:0016757(transferase activity, transferring glycosyl groups);GO:0030133(transport vesicle);GO:0030246(carbohydrate binding);GO:0030246(carbohydrate binding)	00512(Mucin type O-glycan biosynthesis);00512(Mucin type O-glycan biosynthesis)	polypeptide N-acetylgalactosaminyltransferase 15 [Source:NCBI gene;Acc:420642]	0.344846	0.0001	0.0001	1.11357	1.51032	1.25206	0.0890222	-3.48969	0.0797284
MSTRG.115502	LYPD6	ENSGALT00000020379	GO:0030548(acetylcholine receptor regulator activity);GO:0030550(acetylcholine receptor inhibitor activity);GO:0099601(regulation of neurotransmitter receptor activity);GO:2000272(negative regulation of signaling receptor activity)	NA	LY6/PLAUR domain containing 6 [Source:NCBI gene;Acc:771649]	8.45951	11.2567	4.79748	4.77018	3.69183	6.22895	1.66862	0.738656	0.0802545
MSTRG.122244	TNIK	ENSGALT00000015126;ENSGALT00000058071;ENSGALT00000093542	GO:0000165(MAPK cascade);GO:0001934(positive regulation of protein phosphorylation);GO:0004672(protein kinase activity);GO:0004674(protein serine/threonine kinase activity);GO:0005524(ATP binding);GO:0005634(nucleus);GO:0005654(nucleoplasm);GO:0005737(cytoplasm);GO:0005829(cytosol);GO:0005856(cytoskeleton);GO:0006468(protein phosphorylation);GO:0007010(cytoskeleton organization);GO:0007256(activa…	NA	TRAF2 and NCK interacting kinase [Source:HGNC Symbol;Acc:HGNC:30765]	10.9428	13.2648	2.65889	2.69122	2.22382	7.23558	2.21112	1.14478	0.0803527
MSTRG.103742	BTBD6	ENSGALT00000057576	GO:0005515(protein binding);GO:0005829(cytosol);GO:0022008(neurogenesis)	NA	BTB domain containing 6 [Source:NCBI gene;Acc:101752037]	10.1473	5.86838	9.38978	5.72928	5.44405	4.46263	1.62481	0.700268	0.0803999
MSTRG.25985	ST3GAL2	ENSGALT00000004178	GO:0003836(beta-galactoside (CMP) alpha-2,3-sialyltransferase activity);GO:0005794(Golgi apparatus);GO:0006486(protein glycosylation);GO:0008373(sialyltransferase activity);GO:0009101(glycoprotein biosynthetic process);GO:0009247(glycolipid biosynthetic process);GO:0009312(oligosaccharide biosynthetic process);GO:0016020(membrane);GO:0016021(integral component of membrane);GO:0016740(transferase …	00512(Mucin type O-glycan biosynthesis);00533(Glycosaminoglycan biosynthesis - keratan sulfate);00603(Glycosphingolipid biosynthesis - globo and isoglobo series);00604(Glycosphingolipid biosynthesis - ganglio series)	ST3 beta-galactoside alpha-2,3-sialyltransferase 2 [Source:NCBI gene;Acc:395139]	3.92933	6.66987	5.68183	8.75843	7.02376	11.7271	0.591837	-0.756729	0.0804306
MSTRG.116889	RNF2	ENSGALT00000104221;ENSGALT00000062457	GO:0000122(negative regulation of transcription by RNA polymerase II);GO:0000151(ubiquitin ligase complex);GO:0000278(mitotic cell cycle);GO:0000791(euchromatin);GO:0000792(heterochromatin);GO:0001702(gastrulation with mouth forming second);GO:0001739(sex chromatin);GO:0003682(chromatin binding);GO:0004842(ubiquitin-protein transferase activity);GO:0005634(nucleus);GO:0005654(nucleoplasm);GO:0007…	NA	ring finger protein 2 [Source:NCBI gene;Acc:424452]	1.36385	1.62477	1.66991	2.47615	0.945888	7.12678	0.441617	-1.17913	0.0804397
MSTRG.119285	WLS	ENSGALT00000018328	GO:0001707(mesoderm formation);GO:0005769(early endosome);GO:0005794(Golgi apparatus);GO:0005802(trans-Golgi network);GO:0005886(plasma membrane);GO:0006886(intracellular protein transport);GO:0009948(anterior/posterior axis specification);GO:0016020(membrane);GO:0016021(integral component of membrane);GO:0016055(Wnt signaling pathway);GO:0017147(Wnt-protein binding);GO:0030177(positive regulatio…	NA	wntless Wnt ligand secretion mediator [Source:NCBI gene;Acc:424707]	115.099	131.159	92.9655	71.0599	58.3234	89.5587	1.54938	0.631689	0.080452
MSTRG.4361	GLIPR1L	ENSGALT00000016620;ENSGALT00000108220	GO:0005576(extracellular region);GO:0005615(extracellular space);GO:0016020(membrane);GO:0016021(integral component of membrane);GO:0016021(integral component of membrane)	NA	GLI pathogenesis-related 1-like [Source:NCBI gene;Acc:417862]	2.18723	1.76316	0.607815	3.68599	3.11879	3.73432	0.432504	-1.20922	0.0804984
MSTRG.104374	DDHD1	ENSGALT00000020311	GO:0004620(phospholipase activity);GO:0046872(metal ion binding);GO:0090141(positive regulation of mitochondrial fission)	NA	DDHD domain containing 1 [Source:NCBI gene;Acc:423592]	5.9578	4.43367	2.47154	1.68021	2.19928	3.10996	1.84035	0.879978	0.0806881
MSTRG.75793	NCOA7	ENSGALT00000031745;ENSGALT00000093498	GO:0030374(nuclear receptor transcription coactivator activity);GO:0035257(nuclear hormone receptor binding);GO:0045944(positive regulation of transcription by RNA polymerase II);GO:1900408(negative regulation of cellular response to oxidative stress);GO:1902083(negative regulation of peptidyl-cysteine S-nitrosylation);GO:1903204(negative regulation of oxidative stress-induced neuron death);GO:19…	NA	nuclear receptor coactivator 7 [Source:NCBI gene;Acc:421717]	2.24026	0.230264	1.69573	2.69897	3.18044	3.68922	0.435407	-1.19956	0.0807197
MSTRG.121860	SOX2	ENSGALT00000068561	GO:0000122(negative regulation of transcription by RNA polymerase II);GO:0000981(DNA-binding transcription factor activity, RNA polymerase II-specific);GO:0001649(osteoblast differentiation);GO:0001654(eye development);GO:0001714(endodermal cell fate specification);GO:0003677(DNA binding);GO:0003700(DNA-binding transcription factor activity);GO:0005623(cell);GO:0005634(nucleus);GO:0005654(nucleop…	NA	SRY-box 2 [Source:NCBI gene;Acc:396105]	0.0001	1.5049	1.22696	7.31554	2.96619	2.37291	0.215886	-2.21166	0.0807962
MSTRG.110539	HIBCH	ENSGALT00000061142;ENSGALT00000076920	GO:0003860(3-hydroxyisobutyryl-CoA hydrolase activity);GO:0005739(mitochondrion);GO:0006574(valine catabolic process);GO:0009083(branched-chain amino acid catabolic process);GO:0016787(hydrolase activity);GO:0016787(hydrolase activity)	00280(Valine, leucine and isoleucine degradation);00410(beta-Alanine metabolism);00640(Propanoate metabolism);00640(Propanoate metabolism)	3-hydroxyisobutyryl-CoA hydrolase [Source:NCBI gene;Acc:423979]	5.5559	5.55077	3.65291	10.3096	8.43084	6.71317	0.579863	-0.786216	0.0809216
MSTRG.99310	JMJD7;ENSGALG00000008752	ENSGALT00000044740;ENSGALT00000014241;ENSGALT00000100455	GO:0004175(endopeptidase activity);GO:0004177(aminopeptidase activity);GO:0004497(monooxygenase activity);GO:0005634(nucleus);GO:0005737(cytoplasm);GO:0006508(proteolysis);GO:0016706(2-oxoglutarate-dependent dioxygenase activity);GO:0018126(protein hydroxylation);GO:0035064(methylated histone binding);GO:0055114(oxidation-reduction process);GO:0006631(fatty acid metabolic process);GO:0006637(acyl…	00062(Fatty acid elongation);01040(Biosynthesis of unsaturated fatty acids);01040(Biosynthesis of unsaturated fatty acids)	jumonji domain containing 7 [Source:NCBI gene;Acc:423221];acyl-CoA thioesterase 1-like [Source:NCBI gene;Acc:423222]	2.26375	2.47193	1.39751	0.92849	0.746692	1.30228	2.05987	1.04255	0.0813328
MSTRG.7015	BICD1	ENSGALT00000102886;ENSGALT00000095513;ENSGALT00000105797;ENSGALT00000021097;ENSGALT00000101371	GO:0008093(cytoskeletal adaptor activity);GO:0031871(proteinase activated receptor binding);GO:0034063(stress granule assembly);GO:0070840(dynein complex binding);GO:0072393(microtubule anchoring at microtubule organizing center);GO:1900275(negative regulation of phospholipase C activity);GO:1900276(regulation of proteinase activated receptor activity);GO:1900737(negative regulation of phospholip…	NA	BICD cargo adaptor 1 [Source:NCBI gene;Acc:427919]	3.58499	2.59003	3.14757	1.77837	1.28193	2.22082	1.76527	0.819889	0.0815526
MSTRG.63961	VPS11	ENSGALT00000048630;ENSGALT00000066516;ENSGALT00000102003;ENSGALT00000095162;ENSGALT00000102330	GO:0005515(protein binding);GO:0005764(lysosome);GO:0005765(lysosomal membrane);GO:0005768(endosome);GO:0005769(early endosome);GO:0005776(autophagosome);GO:0005884(actin filament);GO:0006886(intracellular protein transport);GO:0006904(vesicle docking involved in exocytosis);GO:0006914(autophagy);GO:0007032(endosome organization);GO:0007033(vacuole organization);GO:0015031(protein transport);GO:0…	NA	VPS11, CORVET/HOPS core subunit [Source:NCBI gene;Acc:419702]	3.72548	4.59465	1.62255	6.60149	6.14784	5.02013	0.559537	-0.837694	0.0815908
MSTRG.25226	KBTBD13	ENSGALT00000011869	GO:0005515(protein binding)	NA	kelch repeat and BTB domain containing 13 [Source:HGNC Symbol;Acc:HGNC:37227]	0.0001	0.0001	0.0001	1.6209	0.0001	0.840483	0.000121878	-13.0023	0.0817043
MSTRG.28834	IP6K1;CDHR4	ENSGALT00000090971;ENSGALT00000099014;ENSGALT00000100510;ENSGALT00000091561;ENSGALT00000099903;ENSGALT00000003959;ENSGALT00000103230	GO:0000828(inositol hexakisphosphate kinase activity);GO:0001650(fibrillar center);GO:0005634(nucleus);GO:0005737(cytoplasm);GO:0005829(cytosol);GO:0016301(kinase activity);GO:0016310(phosphorylation);GO:0016740(transferase activity);GO:0032958(inositol phosphate biosynthetic process);GO:0046854(phosphatidylinositol phosphorylation);GO:0120163(negative regulation of cold-induced thermogenesis);GO…	04070(Phosphatidylinositol signaling system);04070(Phosphatidylinositol signaling system)	inositol hexakisphosphate kinase 1 [Source:NCBI gene;Acc:100857294];cadherin related family member 4 [Source:NCBI gene;Acc:101749086]	4.61061	6.37978	4.4698	8.58814	7.72271	7.75767	0.642341	-0.638589	0.0818229
MSTRG.41636	ENSGALG00000038671	ENSGALT00000047977	NA	NA	uncharacterized LOC422090 [Source:NCBI gene;Acc:422090]	0.086242	0.16824	0.39373	0.944267	0.716189	1.95335	0.179371	-2.47898	0.0821689
MSTRG.70759	TRERF1	ENSGALT00000060730;ENSGALT00000016090	GO:0000118(histone deacetylase complex);GO:0003676(nucleic acid binding);GO:0003677(DNA binding);GO:0003700(DNA-binding transcription factor activity);GO:0005634(nucleus);GO:0005654(nucleoplasm);GO:0005667(transcription factor complex);GO:0005730(nucleolus);GO:0005829(cytosol);GO:0006355(regulation of transcription, DNA-templated);GO:0008134(transcription factor binding);GO:0044212(transcription …	NA	transcriptional regulating factor 1 [Source:NCBI gene;Acc:421386]	2.19418	1.58402	1.78214	2.29936	3.22462	4.30617	0.565642	-0.822039	0.0823132
MSTRG.67318	ENSGALG00000004252	ENSGALT00000101791;ENSGALT00000078854;ENSGALT00000047711;ENSGALT00000006765	GO:0004197(cysteine-type endopeptidase activity);GO:0005615(extracellular space);GO:0005764(lysosome);GO:0006508(proteolysis);GO:0008233(peptidase activity);GO:0008234(cysteine-type peptidase activity);GO:0016787(hydrolase activity);GO:0051603(proteolysis involved in cellular protein catabolic process);GO:0051603(proteolysis involved in cellular protein catabolic process)	04140(Autophagy - animal);04142(Lysosome);04145(Phagosome);04210(Apoptosis);04210(Apoptosis)	cathepsin L1-like [Source:NCBI gene;Acc:420160]	0.943109	0.212281	1.0528	2.56308	1.80918	2.01754	0.34558	-1.53291	0.0826111
MSTRG.1971	FAM19A5	ENSGALT00000100388;ENSGALT00000061566;ENSGALT00000082066;ENSGALT00000039228;ENSGALT00000099094	GO:0016020(membrane);GO:0016021(integral component of membrane);GO:0016021(integral component of membrane)	NA	family with sequence similarity 19 member A5, C-C motif chemokine like [Source:NCBI gene;Acc:768638]	2.96706	1.31068	0.964718	3.07579	4.36915	3.22966	0.491115	-1.02587	0.0828044
MSTRG.73040	SIPA1L2	ENSGALT00000076101;ENSGALT00000075800	GO:0005096(GTPase activator activity);GO:0005515(protein binding);GO:0043547(positive regulation of GTPase activity);GO:0051056(regulation of small GTPase mediated signal transduction);GO:0051056(regulation of small GTPase mediated signal transduction)	NA	signal induced proliferation associated 1 like 2 [Source:NCBI gene;Acc:421523]	16.0143	13.5261	12.2098	7.70043	7.64434	11.3632	1.56321	0.644512	0.0829092
MSTRG.71798	BTBD9	ENSGALT00000038190;ENSGALT00000104883	GO:0005515(protein binding);GO:0007616(long-term memory);GO:0008344(adult locomotory behavior);GO:0042428(serotonin metabolic process);GO:0042748(circadian sleep/wake cycle, non-REM sleep);GO:0048512(circadian behavior);GO:0050951(sensory perception of temperature stimulus);GO:0060586(multicellular organismal iron ion homeostasis);GO:1900242(regulation of synaptic vesicle endocytosis);GO:1900242(…	NA	BTB domain containing 9 [Source:NCBI gene;Acc:421429]	15.1613	11.9054	13.4745	19.897	27.4009	16.4445	0.636016	-0.652865	0.0830768
MSTRG.64244	UBASH3B	ENSGALT00000076950	GO:0004725(protein tyrosine phosphatase activity);GO:0005515(protein binding);GO:0006469(negative regulation of protein kinase activity);GO:0009968(negative regulation of signal transduction);GO:0016791(phosphatase activity);GO:0030168(platelet activation);GO:0035335(peptidyl-tyrosine dephosphorylation);GO:0038063(collagen-activated tyrosine kinase receptor signaling pathway);GO:0038065(collagen-…	NA	ubiquitin associated and SH3 domain containing B [Source:NCBI gene;Acc:419748]	4.32826	1.36198	2.56313	6.70113	4.36744	6.0034	0.483446	-1.04857	0.0831759
MSTRG.81339	TRAM2	ENSGALT00000026905	GO:0005791(rough endoplasmic reticulum);GO:0006616(SRP-dependent cotranslational protein targeting to membrane, translocation);GO:0016020(membrane);GO:0016021(integral component of membrane);GO:0032964(collagen biosynthetic process);GO:0045048(protein insertion into ER membrane)	NA	translocation associated membrane protein 2 [Source:NCBI gene;Acc:422040]	3.42134	2.48758	0.850562	4.17408	4.68242	4.89563	0.491523	-1.02467	0.0832508
MSTRG.107693	ENSGALG00000005156	ENSGALT00000008280	GO:0004252(serine-type endopeptidase activity);GO:0005044(scavenger receptor activity);GO:0006508(proteolysis);GO:0006898(receptor-mediated endocytosis);GO:0008233(peptidase activity);GO:0008236(serine-type peptidase activity);GO:0016020(membrane);GO:0016787(hydrolase activity)	NA	neurotrypsin-like [Source:NCBI gene;Acc:423740]	0.286585	0.719301	0.512394	1.38917	1.20667	2.07808	0.324841	-1.62219	0.0833971
MSTRG.87899	ETNPPL	ENSGALT00000066078	GO:0003824(catalytic activity);GO:0008483(transaminase activity);GO:0030170(pyridoxal phosphate binding);GO:0050459(ethanolamine-phosphate phospho-lyase activity)	00564(Glycerophospholipid metabolism)	ethanolamine-phosphate phospho-lyase [Source:NCBI gene;Acc:428743]	1.66527	3.04582	2.63187	0.928095	1.11112	1.46055	2.09813	1.0691	0.0834203
MSTRG.39273	CLIC3	ENSGALT00000073089	GO:0005254(chloride channel activity);GO:0005515(protein binding);GO:0005634(nucleus);GO:0005737(cytoplasm);GO:0006821(chloride transport);GO:0016604(nuclear body);GO:1902476(chloride transmembrane transport)	NA	chloride intracellular channel 3 [Source:NCBI gene;Acc:417293]	1.04712	0.52956	0.412594	1.24324	1.79712	3.43761	0.307083	-1.7033	0.0836209
MSTRG.39754	ENSGALG00000042325	ENSGALT00000098117;ENSGALT00000097711;ENSGALT00000054954	GO:0003676(nucleic acid binding);GO:0005634(nucleus);GO:0008270(zinc ion binding);GO:0030332(cyclin binding);GO:0032298(positive regulation of DNA-dependent DNA replication initiation);GO:0046872(metal ion binding);GO:0051457(maintenance of protein location in nucleus);GO:0051457(maintenance of protein location in nucleus)	NA	CDKN1A interacting zinc finger protein 1 [Source:NCBI gene;Acc:417216]	5.16709	6.12972	5.1653	8.39958	8.54841	9.25874	0.628164	-0.670787	0.083712
MSTRG.52523	PTPN3	ENSGALT00000068708;ENSGALT00000030996	GO:0001784(phosphotyrosine residue binding);GO:0004721(phosphoprotein phosphatase activity);GO:0004725(protein tyrosine phosphatase activity);GO:0005515(protein binding);GO:0005737(cytoplasm);GO:0005856(cytoskeleton);GO:0006470(protein dephosphorylation);GO:0008092(cytoskeletal protein binding);GO:0009898(cytoplasmic side of plasma membrane);GO:0016311(dephosphorylation);GO:0016787(hydrolase acti…	NA	protein tyrosine phosphatase, non-receptor type 3 [Source:NCBI gene;Acc:420963]	2.10687	1.32163	2.00428	3.00734	3.76578	3.37712	0.535237	-0.90175	0.0837593
MSTRG.75958	SMPDL3A	ENSGALT00000105817	GO:0004767(sphingomyelin phosphodiesterase activity);GO:0005576(extracellular region);GO:0005615(extracellular space);GO:0006685(sphingomyelin catabolic process);GO:0008081(phosphoric diester hydrolase activity);GO:0008270(zinc ion binding);GO:0009143(nucleoside triphosphate catabolic process);GO:0016787(hydrolase activity);GO:0046872(metal ion binding)	NA	sphingomyelin phosphodiesterase acid like 3A [Source:NCBI gene;Acc:776223]	2.00827	1.26647	2.08777	3.81812	3.67536	2.02492	0.563383	-0.827812	0.083803
MSTRG.65759	AMPD1	ENSGALT00000003247	GO:0003876(AMP deaminase activity);GO:0005829(cytosol);GO:0006188(IMP biosynthetic process);GO:0009168(purine ribonucleoside monophosphate biosynthetic process);GO:0016787(hydrolase activity);GO:0019239(deaminase activity);GO:0032264(IMP salvage);GO:0046033(AMP metabolic process);GO:0046872(metal ion binding)	00230(Purine metabolism)	adenosine monophosphate deaminase 1 [Source:NCBI gene;Acc:772125]	0.34801	0.0113837	0.264622	0.996379	1.35644	0.876976	0.193206	-2.37179	0.0838271
MSTRG.107608	KAT6B	ENSGALT00000008074	GO:0000123(histone acetyltransferase complex);GO:0000786(nucleosome);GO:0000790(nuclear chromatin);GO:0003677(DNA binding);GO:0004402(histone acetyltransferase activity);GO:0005634(nucleus);GO:0006334(nucleosome assembly);GO:0006355(regulation of transcription, DNA-templated);GO:0008134(transcription factor binding);GO:0010485(H4 histone acetyltransferase activity);GO:0016407(acetyltransferase ac…	NA	lysine acetyltransferase 6B [Source:NCBI gene;Acc:423734]	3.27106	1.21064	1.48574	2.8967	3.41544	4.95511	0.529627	-0.916952	0.084027
MSTRG.34524	ENSGALG00000003026	ENSGALT00000098477;ENSGALT00000059632;ENSGALT00000004784	GO:0051145(smooth muscle cell differentiation);GO:0051145(smooth muscle cell differentiation)	NA		4.18819	7.02097	6.49892	11.339	10.8218	6.91232	0.609086	-0.715281	0.0840922
MSTRG.76161	RWDD1	ENSGALT00000031721;ENSGALT00000087121	GO:0002181(cytoplasmic translation);GO:0005515(protein binding);GO:0005737(cytoplasm);GO:0005844(polysome);GO:0007569(cell aging);GO:0030521(androgen receptor signaling pathway);GO:0034599(cellular response to oxidative stress);GO:0071394(cellular response to testosterone stimulus);GO:2000825(positive regulation of androgen receptor activity);GO:2000825(positive regulation of androgen receptor ac…	NA	RWD domain containing 1 [Source:NCBI gene;Acc:421741]	7.88989	5.84788	9.53894	2.25109	2.97874	7.03208	1.89829	0.924703	0.0842682
[truncated: 16,566 more rows]
